# Supplementary material for: Pentaphosphorylated magic spot nucleotides: chemoenzymatic synthesis and disassembly-based sensing
Source: Royal Society of Chemistry journal article supplement (doi:10.1039/d6ob00328a), 2026-04-14
Supplement: d6ob00328a1.pdf [file d6ob00328a1.pdf]

# Pentaphosphorylated Magic Spot Nucleotides: Chemoenzymatic Synthesis and Disassembly-Based Sensing

Patrick Moser, Subhra Kanti Roy, Marvin Herzog, Felix Bauer, Felix Wollensack, Bernhard Breit, and  
Henning J. Jessen

## Supporting Information

### Contents

|                                                                                       |    |
|---------------------------------------------------------------------------------------|----|
| 1. Abbreviations .....                                                                | 2  |
| 2. Synthetic methods and analysis .....                                               | 4  |
| 3. Experimental procedures .....                                                      | 5  |
| 3.1. Synthesis of Fmoc-G, ppNpp and P-amedites .....                                  | 5  |
| 3.2. Synthesis of ppAp and ppGp .....                                                 | 6  |
| 3.3. Synthesis of pppApp and pppGpp .....                                             | 7  |
| 3.4. Synthesis of ppNp from regioisomeric ppNpp mixtures .....                        | 9  |
| 3.5. Synthesis of clickable pppApp .....                                              | 10 |
| 3.6. Synthesis of Fe-Sal complex .....                                                | 13 |
| 4. Spectroscopic studies .....                                                        | 14 |
| 4.1. Materials and Methods .....                                                      | 14 |
| 4.2. Time-Dependent Fluorescence Response .....                                       | 15 |
| 4.3. Fluorescence Titration and Concentration Dependence .....                        | 16 |
| 4.4. Selectivity toward Phosphate Species .....                                       | 17 |
| 4.5. Fluorescence intensity of Salen complex with different phosphate compounds ..... | 18 |
| 5. DFT studies .....                                                                  | 19 |
| 6. NMR spectra .....                                                                  | 35 |
| 7. HRMS analysis .....                                                                | 67 |
| 8. References .....                                                                   | 69 |

## 1. Abbreviations

Äkta<sup>®</sup>: chromatography system (GE Healthcare)  
Aq.: aqueous  
br s: broad singlet  
calcd: calculated  
cPyPA: cyclic pyrophosphoryl phosphoramidite  
CuAAC: copper-catalyzed azide–alkyne cycloaddition  
D<sub>2</sub>O: deuterium oxide  
DBU: 1,8-diazabicyclo[5.4.0]undec-7-ene  
DIPEA: N,N-diisopropylethylamine  
DMF: N,N-dimethylformamide  
DMSO: dimethyl sulfoxide  
d: doublet  
dd: doublet of doublets  
ddd: doublet of doublet of doublets  
eq: equivalents  
ESI: electrospray ionization  
Et<sub>2</sub>O: diethyl ether  
ETT: 5-(ethylthio)-1H-tetrazole  
Fmoc: 9-fluorenylmethoxycarbonyl  
g: gram  
h: hour(s)  
HCl: hydrochloric acid  
HEPES: 4-(2-hydroxyethyl)-1-piperazineethanesulfonic acid  
HPLC: high-performance liquid chromatography  
HRMS: high-resolution mass spectrometry  
Hz: Hertz  
IP<sub>6</sub> = myo-Inositol hexakisphosphate  
IP<sub>7</sub> = myo-Inositol heptakisphosphate  
IEFPCM: integral equation formalism polarizable continuum model  
*J*: coupling constant  
ku: kilo unit(s) (enzyme activity)  
LC-MS: liquid chromatography–mass spectrometry  
m: multiplet  
mCPBA: meta-chloroperbenzoic acid  
MeCN: acetonitrile  
MeOH: methanol  
MHz: Megahertz  
MPLC: medium-pressure liquid chromatography  
MS: mass spectrometry  
n: number of replicates  
NMR: nuclear magnetic resonance  
ON: overnight

PBS: phosphate-buffered saline  
PPC (or IEFPCM=water): implicit solvent model (water)  
ppApp: adenosine-3',5'-bis(diphosphate)  
ppAp: adenosine-3'-phosphate-5'-diphosphate  
ppGpp: guanosine-3',5'-bis(diphosphate)  
ppGp: guanosine-3'-phosphate-5'-diphosphate  
pppApp: adenosine-3'-diphosphate-5'-triphosphate  
pppGpp: guanosine-3'-diphosphate-5'-triphosphate  
q: quartet  
Q-Sepharose: strong anion-exchange resin  
quant.: quantitative  
RP-MPLC: reversed-phase medium-pressure liquid chromatography  
rt: room temperature  
s: singlet  
SD: standard deviation  
scf=xqc: quadratic convergence option in self-consistent field calculations  
SDD: Stuttgart/Dresden effective core potential  
SI: Supporting Information  
t: triplet  
TBA: tetrabutylammonium  
TBA-Br: tetrabutylammonium bromide  
TEAA: triethylammonium acetate  
THPTA: tris(3-hydroxypropyltriazolylmethyl)amine  
Tris: tris(hydroxymethyl)aminomethane  
UB3LYP: unrestricted B3LYP functional  
UV/Vis: ultraviolet/visible  
v/v: volume/volume  
vac.: vacuum  
 $\zeta$  (zvp): zero-point vibrational energy  
 $\lambda_{\text{ex}}$ : excitation wavelength

## 2. Synthetic methods & analyses

### General remarks

**Reactions** were carried out using flame-dried glassware under an atmosphere of dry N<sub>2</sub> and magnetically stirred, unless noted otherwise. Air- and moisture-sensitive liquids and solutions were transferred via syringe or stainless steel cannula.

**Reagents** were purchased from commercial suppliers (Acros, Aldrich, Fluka, TCI) and used without further purification, unless noted otherwise. DBU (1-8-diazabicyclo[5.4.0]undec-7-en) was distilled under high vacuum and stored over molecular sieves before usage.

**Solvents** were obtained in analytical grade and used as received for extractions, precipitation and solid washing. Dry DMF, DMSO and MeCN for reactions were purchased in a dry form from Sigma and stored over molecular sieves as well as under an atmosphere of dry N<sub>2</sub>. Dry Et<sub>2</sub>O for reactions was purified by filtration and dried by passage over activated anhydrous neutral A-2 alumina (MBraun solvent purification system) under an atmosphere of dry N<sub>2</sub>.

**Ribonuclease T2** from *Aspergillus oryzae* (50 ku) was purchased from Worthington Biochemical Corporation as lyophilized powder and dissolved in a storage buffer [glycerol / NaH<sub>2</sub>PO<sub>4</sub> (10 mM, pH 6.8), 1/1]. The stock solution was stored at -20 °C.

**Deuterated solvents** for NMR and reactions were obtained from Armar Chemicals, Switzerland and euriso-top, Germany, in the indicated purity grade and used as received for NMR spectroscopy.

**Strong ion-exchange chromatography** was performed using an automated Äkta<sup>®</sup>-system. Q-Sepharose was purchased from Aldrich. Buffer solutions were produced manually using milliQ H<sub>2</sub>O.

**Preparative RP-MPLC** was performed using an automated Interchim<sup>®</sup>-system. The AQ- solid phase was purchased from Interchim. Lyophilizations were done with Christ Freeze Dryer Alpha 1-4 LDplus and Christ Freeze Dryer Alpha 1-2 LDplus.

**<sup>1</sup>H-NMR** spectra were recorded on Bruker 300 MHz spectrometers, Bruker 400 MHz (with cryoprobe) and Bruker 500 MHz spectrometers in the indicated deuterated solvent. Data are reported as follows: chemical shift ( $\delta$ , ppm), multiplicity (s, singlet; d, doublet; t, triplet; q, quartet; m, multiplet; br. s, broad signal), coupling constant(s) ( $J$ , Hz), integration. All signals were referenced to the internal solvent signal as standard (D<sub>2</sub>O,  $\delta$  4.70; DMF-d<sub>7</sub>,  $\delta$  2.94).

**<sup>13</sup>C{<sup>1</sup>H}-NMR** spectra were recorded with <sup>1</sup>H-decoupling on Bruker 126 MHz, Bruker 101 MHz (with cryoprobe) spectrometers at 298 K in the indicated deuterated solvent.

**<sup>31</sup>P{<sup>1</sup>H}-NMR** spectra and **<sup>31</sup>P-NMR** spectra were recorded with <sup>1</sup>H-decoupling or 1H coupling, respectively, on Bruker 202 MHz, 162 MHz (with cryoprobe) and Bruker 122 MHz spectrometers in the indicated deuterated solvent. All signals were referenced to an internal standard (PPP).

**Mass spectra** were recorded by C. Warth (Mass spectrometry service of the University of Freiburg) on a Thermo LCQ Advantage [spray voltage: 2.5 - 4.0 kV, spray current: 5  $\mu$ A, ion transfer tube: 250 (150)  $^{\circ}$ C, evaporation temperature: 50 - 400  $^{\circ}$ C.

### 3. Experimental Procedures

#### 3.1. Synthesis of Fmoc-G, ppApp, ppGpp & P-amidites

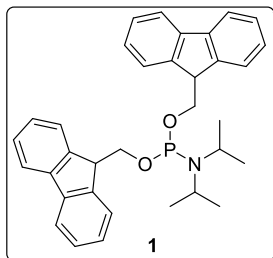

(FmO)<sub>2</sub>P-N(*i*Pr)<sub>2</sub> **1** was synthesized in two steps starting from PCl<sub>3</sub> as reported previously. Analytical data were identical to literature.<sup>1</sup> The compound was stored at -20  $^{\circ}$ C.

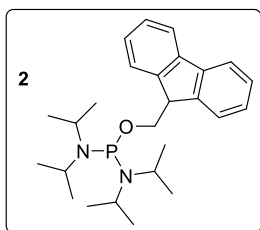

(FmO)P-N[(*i*Pr)<sub>2</sub>]<sub>2</sub> **2** was synthesized as reported previously. Analytical data were identical to literature.<sup>2</sup> The compound was stored at -20  $^{\circ}$ C.

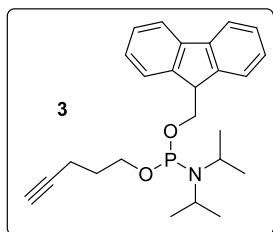

(PentynylO)(FmO)P-N(*i*Pr) **3** was synthesized as reported previously. Analytical data were identical to literature.<sup>3</sup> The compound was stored at -20  $^{\circ}$ C.

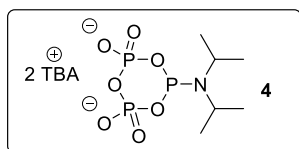

Cyclic pyrophosphoryl-*P*-amidite (cPyPA,**4**) was synthesized according to literature<sup>4</sup> and stored over molecular sieves at -20  $^{\circ}$ C.

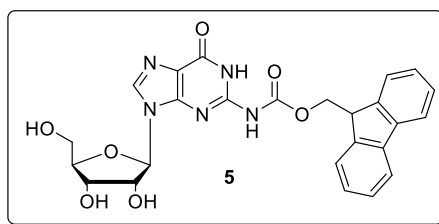

2-*N*-(9-Fluorenylmethoxycarbonyl)guanosine (**5**) was synthesized in one step from guanosine according to Quaedflieg et al. Analytical data were identical to literature.<sup>5</sup>

### 3.2. Synthesis of nucleotide 3'-phosphate 5'-diphosphates ppAp & ppGp

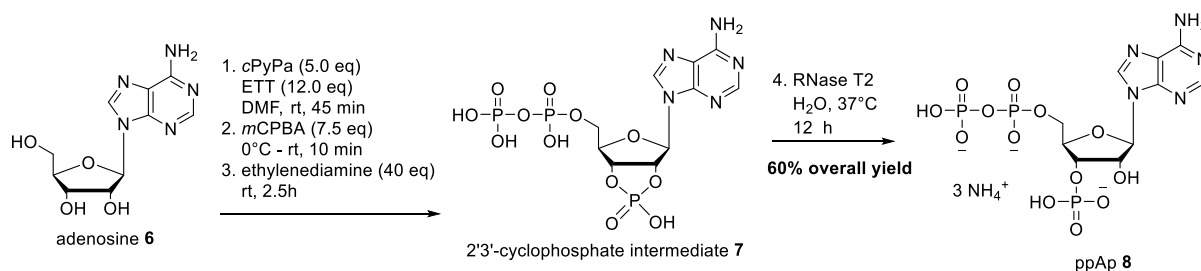

Adenosine (**6**, 500 mg, 2.00 mmol) and ETT (2.92 g, 24.0 mmol, 12.0 eq) were coevaporated together with dry MeCN ( $2 \times 4.0$  mL) in a flame dried roundbottom flask. The residue was dissolved in dry DMF (30.0 mL). Then *c*PyPA (0.4 M in DMF, 25.0 mL, 9.0 mL, 5.0 eq) was added dropwise within 5 min, and the resulting solution was stirred for 45 min at rt. The solution was cooled to 0 °C, and *m*CPBA (77%, 3.15 g, 7.0 mmol, 7.5 eq) was added within 5 min in portions. The mixture was stirred at 0 °C for 10 min. To the reaction mixture was added ethylenediamine (5.0 mL, 37.5 mmol, 40.0 eq) and the resulting solution was stirred for 2.5 h at rt, before being precipitated by the addition of Et<sub>2</sub>O (200 mL). The resulting solid was dissolved in H<sub>2</sub>O (50 mL), and RNase T2 (500 u) was added. The solution was incubated at 37 °C for 12h. Afterwards the solution was directly applied to a strong ion-exchange column (Q-Sepharose). The product was eluted using NH<sub>4</sub>HCO<sub>3</sub> – buffer (350 mM). Lyophilization of the product containing fractions (analyzed via <sup>31</sup>P NMR) afforded the desired product (**8**, 791 mg, 1.28 mmol, 64 %) as white solid.

<sup>1</sup>H NMR (400 MHz, D<sub>2</sub>O, δ/ppm) 8.55 (d, *J* = 1.4 Hz, 1H), 8.30 – 8.24 (m, 1H), 6.24 – 6.16 (m, 1H), 4.91 – 4.85 (m, 2H), 4.63 (t, *J* = 2.6 Hz, 1H), 4.28 (dd, *J* = 5.4, 2.8 Hz, 2H).

<sup>13</sup>C NMR (101 MHz, D<sub>2</sub>O, δ/ppm) δ 154.93, 152.01, 149.08, 140.06, 118.52, 86.52, 83.35 (dd, *J* = 9.1, 3.7 Hz), 73.75 (d, *J* = 4.8 Hz), 65.02 (d, *J* = 5.4 Hz), 36.71.

<sup>31</sup>P NMR (162 MHz, D<sub>2</sub>O, δ/ppm) δ 4.09, -5.91 (d, *J* = 16.4 Hz), -10.50 (d, *J* = 16.4 Hz).

HRMS (ESI): *m/z* calcd for C<sub>10</sub>H<sub>15</sub>N<sub>5</sub>O<sub>13</sub>P<sub>3</sub> [M-H]<sup>-</sup> 505.9884; found: 505.9884.

The compounds were previously characterized, and the analytical data matched those reported in the literature.<sup>6</sup>

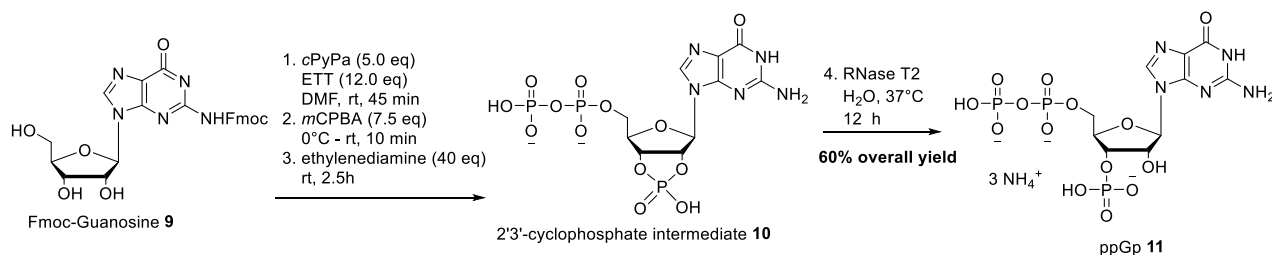

Fmoc-guanosine (**9**, 500 mg, 1.00 mmol) and ETT (1.46 g, 12.0 mmol, 12.0 eq) were coevaporated together with dry MeCN ( $2 \times 4.0$  mL) in a flame dried roundbottom flask. The residue was dissolved in dry DMF (15.0 mL). Then cPyPA (0.4 M in DMF, 12.5 mL, 4.5 mL, 5.0 eq) was added dropwise within 5 min, and the resulting solution was stirred for 45 min at rt. The solution was cooled to 0 °C, and mCPBA (77%, 1.57 g, 3.5 mmol, 7.5 eq) was added within 5 min in portions. The mixture was stirred at 0 °C for 10 min. To the reaction mixture was added diethylamine (2.5 mL, 18.8 mmol, 40.0 eq) and the resulting solution was stirred for 2.5 h at rt, before being precipitated by the addition of Et<sub>2</sub>O (100 mL). The resulting solid was dissolved in H<sub>2</sub>O (35 mL), and RNase T2 (300 u) was added. The solution was incubated at 37 °C for 12h. Afterwards the solution was directly applied to a strong ion-exchange column (Q-Sepharose). The product was eluted using NH<sub>4</sub>HCO<sub>3</sub> – buffer (350 mM). Lyophilization of the product containing fractions (analyzed via <sup>31</sup>P NMR) afforded the desired product (**11**, 201 mg, 0.42 mmol, 42 %) as white solid.

<sup>1</sup>H-NMR (400 MHz, D<sub>2</sub>O, δ/ppm): 8.17 (s, 1H), 5.99 (d,  $J = 6.7$  Hz, 1H), 4.89 – 4.74 (m, 2H), 4.64 – 4.53 (m, 1H), 4.32 – 4.21 (m, 2H).

<sup>13</sup>C{<sup>1</sup>H}-NMR (101 MHz, D<sub>2</sub>O, δ/ppm): 153.1, 154.0, 152.0, 137.8, 116.3, 86.5, 83.6 (dd,  $J = 9.4, 4.2$  Hz), 73.7 (d,  $J = 4.9$  Hz), 73.3 (d,  $J = 4.4$  Hz), 65.2 (d,  $J = 5.3$  Hz).

<sup>31</sup>P{<sup>1</sup>H}-NMR (162 MHz, D<sub>2</sub>O, δ/ppm): 1.95, -9.63 (d,  $J = 21.0$  Hz), -11.06 (d,  $J = 20.8$  Hz).

HRMS (ESI)  $m/z$  for C<sub>10</sub>H<sub>15</sub>N<sub>5</sub>O<sub>14</sub>P<sub>3</sub> [M-H]<sup>-</sup>: calcd 521.9829, found 521.9832.

The compounds were previously characterized, and the analytical data matched those reported in the literature.<sup>3</sup>

### 3.3. Synthesis of pppGpp and pppApp

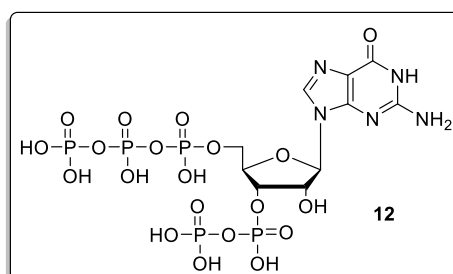

To a solution of ppGp x 3.0 TBA (747 mg, 600 μmol) in dry DMF (10 ml) was added ETT (468 mg, 3.60 mmol, 6.0 eq.). Afterwards, a solution of **1** (1.17 g, 1.80 mmol, 3.0 eq.) in DMF (6.5 ml) was added in one portion and the resulting mixture was stirred for 15 min at room temperature. Afterwards, the solution was cooled to -20 °C and mCPBA (77%, 488 mg, 1.98 mmol, 3.3 eq.) was added. The solution was stirred for 5 min at -20 °C and for 10 min at 0 °C.

Afterwards, distilled DBU (1.6 mL) was added at 0 °C. The solution was stirred for 5 min at 0 °C and 25 min at room temperature before precipitation was induced by addition of Et<sub>2</sub>O (100 mL). The precipitate was separated by centrifugation, washed with Et<sub>2</sub>O (3 x 10 mL) and dried under high vac. The crude product was purified by strong ion-exchange chromatography (Q-Sepharose) using an Äkta-system and NaClO<sub>4</sub> – buffer (100 mM). The product containing fractions (analyzed via <sup>31</sup>P NMR) were precipitated using an 8-fold volume of NaClO<sub>4</sub> – solution (–20 °C, 500 mM in acetone). The resulting solid was washed with acetone (–20 °C, 3 x 10 mL) and dried under high vac for 2 h. The product (**12**) (429 mg, 516 μmol, 89%) was isolated as a white solid.

<sup>1</sup>H-NMR (400 MHz, D<sub>2</sub>O, δ/ppm): 8.08 (s, 1H), 5.94 (d, *J* = 6.5 Hz, 1H), 4.89 (ddd, *J* = 8.4, 5.0, 2.9 Hz, 1H), 4.92 – 4.86 (m, 1H), 4.51 – 4.44 (m, 1H), 4.24 – 4.14 (m, 2H).

<sup>13</sup>C{<sup>1</sup>H}-NMR (101 MHz, D<sub>2</sub>O, δ/ppm): 159.2, 154.0, 152.0, 138.0, 116.3, 86.9, 83.3 (dd, *J* = 9.1, 4.3 Hz), 74.9 (d, *J* = 5.1 Hz), 73.1 (d, *J* = 4.2 Hz), 65.5 (d, *J* = 5.2 Hz).

<sup>31</sup>P{<sup>1</sup>H}-NMR (162 MHz, D<sub>2</sub>O, δ/ppm): -5.60 (d, *J* = 21.9 Hz), -10.70 (d, *J* = 16.0 Hz), -10.85 (d, *J* = 13.9 Hz), -10.97 (d, *J* = 10.0 Hz), -21.09 (dd, *J* = 18.9 Hz).

HRMS (ESI) *m/z* for C<sub>10</sub>H<sub>16</sub>N<sub>5</sub>O<sub>20</sub>P<sub>5</sub> [M-H]<sup>-</sup>: calcd 681.90088, found 681.9161.

The compounds were previously characterized, and the analytical data matched those reported in the literature.<sup>6</sup>

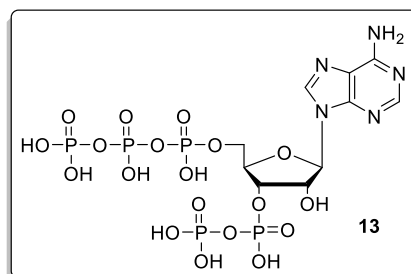

To a solution of ppAp x 3.0 TBA (1.37 g, 0.11 mmol) in dry DMF (20 ml) was added ETT (859 mg, 0.66 μmol, 6.0 eq.). Afterwards, a solution of **1** (2.15 mg, 3.30 mmol, 3.0 eq.) in DMF (10 ml) was added in one portion and the resulting mixture was stirred for 15 min at room temperature. Afterwards, the solution was cooled to –20 °C and *m*CPBA (77%, 895 mg, 3.63 mmol, 3.3 eq.) was added. The solution was stirred for 5 min at –20 °C and for 10 min at 0 °C. Afterwards, distilled DBU (3 mL) was added at 0 °C. The solution was stirred for 5 min at 0 °C and 25 min at room temperature before precipitation was induced by addition of Et<sub>2</sub>O (300 ml). The precipitate was separated by centrifugation, washed with Et<sub>2</sub>O (3 x 10 ml) and dried under high vac. The crude product was purified by strong ion-exchange chromatography (Q-Sepharose) using an Äkta-system and NaClO<sub>4</sub> – buffer (100 mM). The product containing fractions (analyzed via <sup>31</sup>P NMR) were precipitated using an 8-fold volume of NaClO<sub>4</sub> – solution (–20 °C, 500 mM in acetone). The resulting solid was washed with acetone (–20 °C, 3 x 10 ml) and dried under high vac for 2 h. The product (**13**) (59.3 mg, 70.8 μmol, 64%) was isolated as a white solid.

**<sup>1</sup>H-NMR** (400 MHz, D<sub>2</sub>O, δ/ppm): 8.53 (s, 1H), 8.20 (s, 1H), 6.11 (d, *J* = 6.5 Hz, 1H), 4.76 (ddd, *J* = 8.4, 5.0, 2.9 Hz, 1H), 4.82 – 4.76 (m, 1H), 4.41 – 4.34 (m, 1H), 4.14 – 4.04 (m, 2H).

**<sup>13</sup>C{<sup>1</sup>H}-NMR** (101 MHz, D<sub>2</sub>O, δ/ppm): 155.7, 152.9, 149.5, 140.1, 118.7, 86.4, 84.4 (dd, *J* = 9.1, 4.3 Hz), 73.7 (d, *J* = 5.1 Hz), 73.7 (d, *J* = 4.2 Hz), 65.3 (d, *J* = 5.2 Hz).

**<sup>31</sup>P{<sup>1</sup>H}-NMR** (162 MHz, D<sub>2</sub>O, δ/ppm): -6.53 (d, *J* = 21.9 Hz), -7.91 (d, *J* = 16.0 Hz), -10.85 (d, *J* = 13.9 Hz), -10.97 (d, *J* = 10.0 Hz), -21.77 (dd, *J* = 18.9 Hz).

**HRMS** (ESI) *m/z* for C<sub>10</sub>H<sub>16</sub>N<sub>5</sub>O<sub>20</sub>P<sub>5</sub> [M-H]<sup>-</sup>: calcd 607.935644, found 607.9368.

The compounds were previously characterized, and the analytical data matched those reported in the literature.<sup>6</sup>

### 3.4. Synthesis of ppAp & ppGp from regioisomeric ppApp & ppGpp mixtures

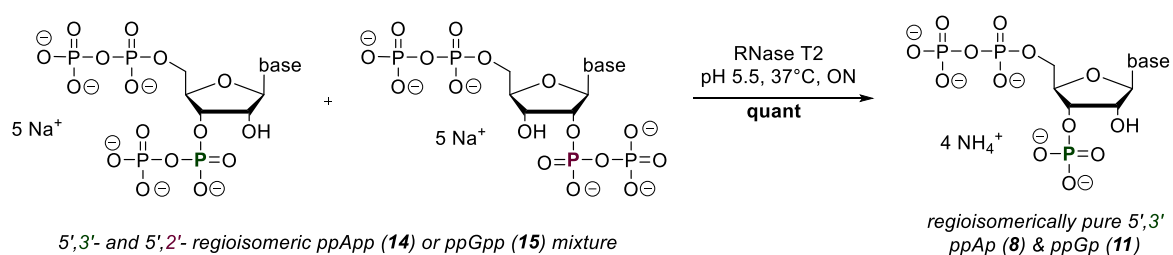

The 5',3'- and 5',2'-regioisomeric ppNpp mixture (2.00 mmol, 1.36 g for **14**, 1.39 g for **15**) was dissolved in H<sub>2</sub>O (50 mL) and acidified to pH = 5.5 using 1 M HCl. Subsequently, ribonuclease T2 (500 U) was added and the solution was incubated at 37 °C for 12 h. The progress of the reaction was monitored by <sup>31</sup>P NMR spectroscopy, indicating complete conversion to a single regioisomer (Fig S1 & S2). The reaction mixture was then applied to a strong anion-exchange column (Q-Sepharose). ppNp was eluted using NH<sub>4</sub>HCO<sub>3</sub> buffer (350 mM). Lyophilization of the product-containing fractions (analyzed via <sup>31</sup>P NMR) afforded the desired product (2.00 mmol, quantitative yield, 1.16 g for **8**, 1.39 g for **11**) as a white solid. The analytical data are consistent with those of ppGp and ppAp obtained via the alternative synthetic routes described above.

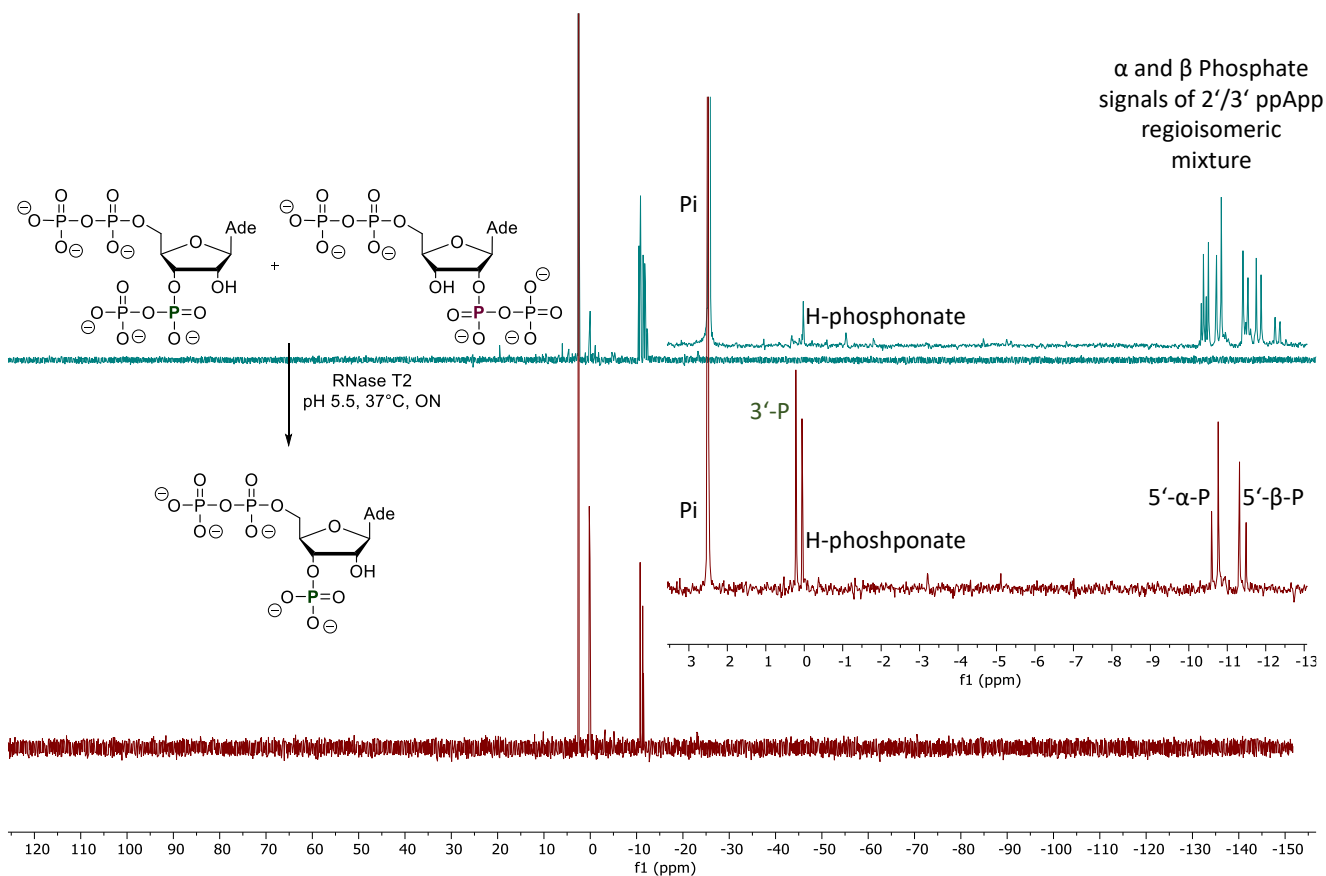

**Figure S1.**  $^{31}\text{P}$  NMR monitoring of the RNase T2-mediated conversion of a regiosomeric ppGpp mixture to ppGp (pH 5.5, 37 °C, 12 h).

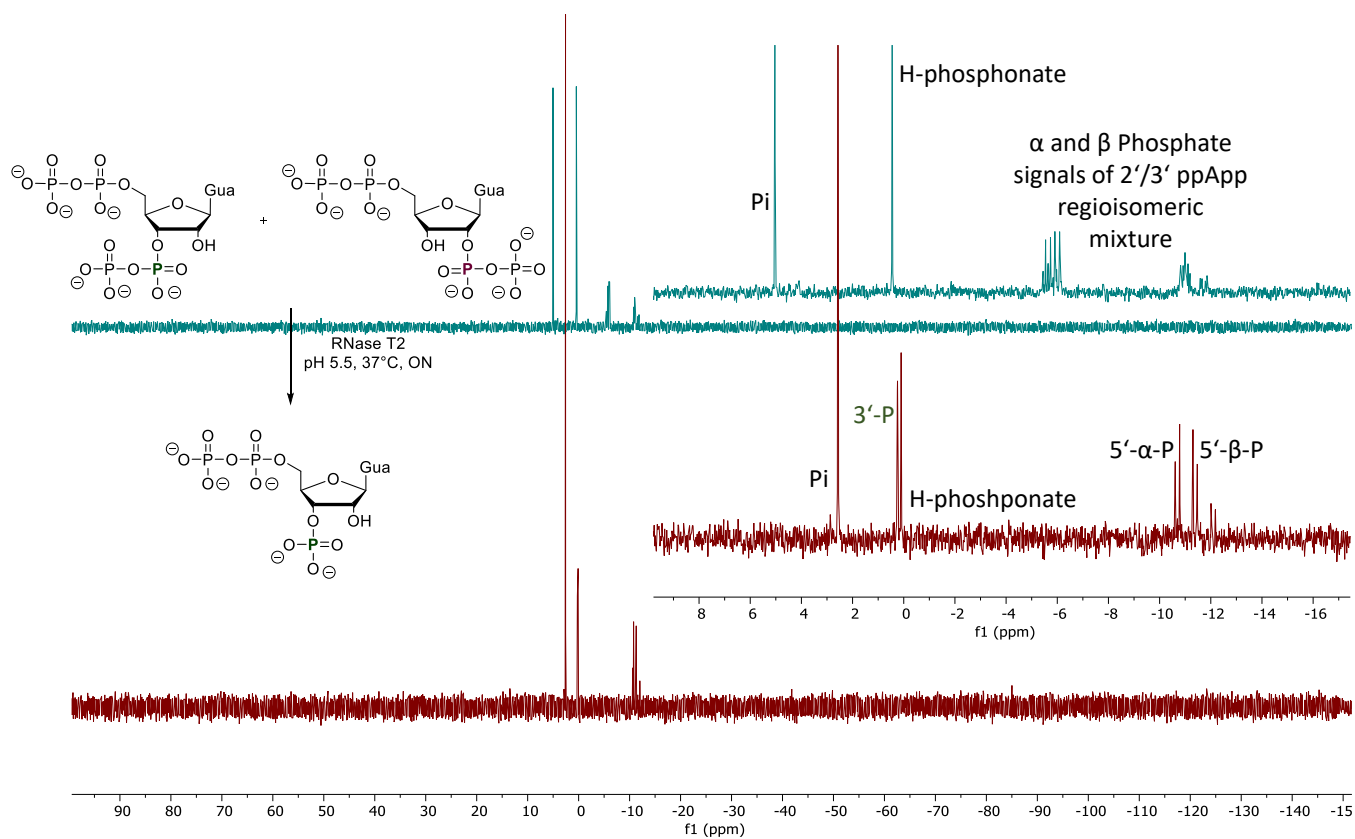

**Figure S2.**  $^{31}\text{P}$  NMR monitoring of the RNase T2-mediated conversion of a regiosomeric ppApp mixture to ppAp (pH 5.5, 37 °C, 12 h)

### 3.5. Synthesis of clickable pppApp

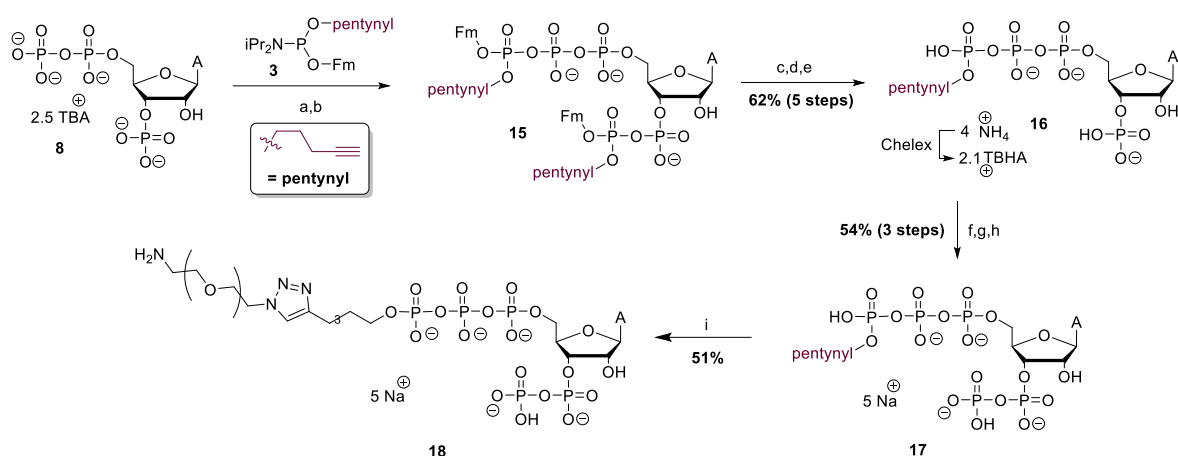

Scheme S1 Synthesis of 5'-Amino-pppApp (**18**): (a) **3** (2.2 eq.), ETT (5.0 eq.), DMF, rt, 15 min. (b) *m*CPBA (2.2 eq.), 0°C, 15 min. (c) MeOH, sonication for 5 min. (d) Piperidine, DMF, rt, 30 min. (e) RNase T2, H<sub>2</sub>O, 12 h. (f) **1** (1.3 eq.), ETT (3.0 eq.), rt, 15 min. (g) *m*CPBA (1.3 eq.), 0°C, 15 min. (h) DBU, 0°C – rt, 30 min. (i) 1-amino-11-azido-3,6,9-trioxa-undecane (1.5 eq.), sodium ascorbate (10 eq.), CuSO<sub>4</sub> (0.1 eq.) THPTA (0.5 eq.), 1x PBS – buffer, rt, 3 h.

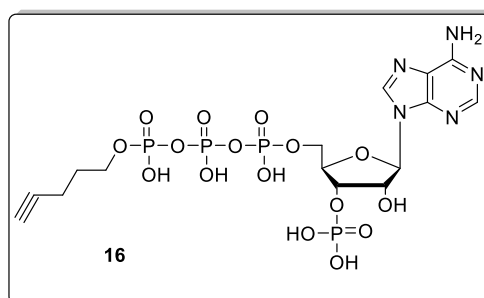

ppAp (**8**) × 2.0 TBA (294 mg, 297 μmol, 1.0 eq.) was dissolved in DMF (8.5 ml), and ETT (135 mg, 1.04 mmol, 3.5 eq.) was added. Afterwards, a solution of phosphoramidite **1** (304 mg, 742 μmol, 2.5 eq.) in DMF (5.5 ml) was added, and the resulting solution was stirred for 15 min at room temperature. The solution was cooled to –5 °C, and *m*CPBA (77%, 166 mg, 742 μmol, 2.5 eq.) was added. After stirring for 10 min at –5 °C, precipitation was induced by adding Et<sub>2</sub>O (40 ml). The resulting solid was washed with ether (2 × 15 ml) and dried under high vacuum before being dissolved in MeOH (14 ml). The resulting solution was stirred for 1 h at room temperature. The solvent was removed under reduced pressure, and the residue was dissolved in DMF (14 ml). Piperidine (708 μl) was added at room temperature. After stirring at room temperature for 30 min, precipitation was induced by the addition of Et<sub>2</sub>O (40 ml). The resulting precipitate was washed with Et<sub>2</sub>O (2 × 20 ml) and dried under high vacuum. The solid was redissolved in H<sub>2</sub>O (20 ml) and acidified with HCl to pH = 5.3. Afterwards, RNase T2 (150 μl) was added, and the solution was incubated at 37 °C overnight. The crude product was purified by strong ion-exchange chromatography (Q-Sepharose) using an Äkta system and a NaClO<sub>4</sub> buffer (110-130 mM). The product-containing fractions (analyzed via <sup>31</sup>P NMR) were precipitated using an 8- fold volume of NaClO<sub>4</sub> solution (–20 °C, 500 mM in acetone). The resulting solid was washed with acetone (–20 °C, 3 × 10 ml) and dried under high vacuum for 2 h. The product **16** (62.0 mg, 81.3 μmol, 27%) was isolated as a white solid. It was converted

into its TBA salt by cation exchange on a Chelex column, loaded with TBA-Br followed by lyophilization.

**$^1\text{H-NMR}$  (400 MHz,  $\text{D}_2\text{O}$ )**  $\delta$  = 8.60 (s, 1H), 8.29 (s, 1H), 6.20 (d,  $J$  = 7.2 Hz, 1H), 4.84 (mc, 1H), 4.78-4.75 (m, 1H), 4.27 (mc, 2H), 4.60 (ddd,  $J$  = 2.9, 2.9, 2.8 Hz, 1H), AB-Signal ( $\delta\text{A}$  = 3.96,  $\delta\text{B}$  = 3.94,  $J\text{AB}$  = 6.5 Hz, 2H), 2.25 – 2.22 (m, 1H), 2.17 (ddd,  $J$  = 7.5, 6.9, 2.5 Hz, 2H), 1.76-1.61 (m, 2H) ppm.

**$^{31}\text{P}\{^1\text{H}\}\text{-NMR}$  (162 MHz,  $\text{D}_2\text{O}$ )**  $\delta$  = 4.07 (s), -10.79 (d,  $J$  = 18.7 Hz), -11.20 (d,  $J$  = 17.9 Hz), -22.70 (dd,  $J$  = 18.3, 18.3 Hz) ppm.

**$^{13}\text{C}\{^1\text{H}\}\text{-NMR}$  (101 MHz,  $\text{D}_2\text{O}$ )**  $\delta$  = 155.7, 153.0, 149.5, 140.0, 118.7, 86.4, 84.9, 84.1 (dd,  $J$  = 9.3, 4.2 Hz), 74.9 (d,  $J$  = 5.2 Hz), 73.7, 69.1, 65.5 (d,  $J$  = 5.4 Hz), 65.2 (d,  $J$  = 5.9 Hz), 28.7 (d,  $J$  = 7.2 Hz), 14.1 (d,  $J$  = 2.9 Hz) ppm.

**HRMS (ESI-):**  $m/z$  for  $\text{C}_{15}\text{H}_{21}\text{N}_5\text{NaO}_{16}\text{P}_4^-$  [ $\text{M-H}$ ] $^-$  calcd. 673.9836, found 673.9836.

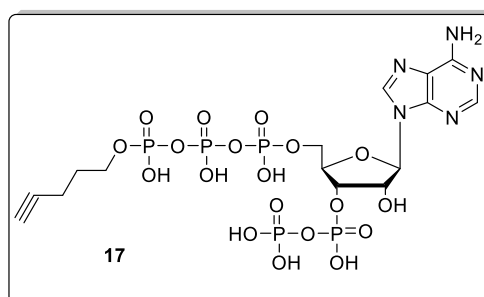

Pentynyl-pppAp (**16**)  $\times$  3.0 TBA (111 mg, 81.0  $\mu\text{mol}$ , 1.0 eq.) was dissolved in DMF (4.0 ml), and ETT (31.6 mg, 243  $\mu\text{mol}$ , 3.0 eq.) was added. Afterwards, a solution of phosphoramidite **1** (63.4 mg, 122  $\mu\text{mol}$ , 1.5 eq.) in DMF (4.0 ml) was added, and the resulting solution was stirred for 15 min at room temperature. The solution was cooled to  $-5$   $^\circ\text{C}$ , and *m*CPBA (77%, 27.3 mg, 122  $\mu\text{mol}$ , 1.5 eq.) was added. The solution was stirred for 15 min at  $-5$   $^\circ\text{C}$ . Subsequently, DBU (158  $\mu\text{l}$ ) was added at  $0$   $^\circ\text{C}$ , and the reaction mixture was stirred for 5 min at  $0$   $^\circ\text{C}$  and for 25 min at room temperature. After stirring for 10 min at  $-20$   $^\circ\text{C}$ , precipitation was induced by the addition of  $\text{Et}_2\text{O}$  (40 ml). The resulting solid was washed with  $\text{Et}_2\text{O}$  ( $2 \times 15$  ml) and dried under high vacuum. The crude product was purified by strong ion-exchange chromatography (Q-Sepharose) using an Äkta system and a  $\text{NaClO}_4$  buffer (130-150 mM). The product-containing fractions (analyzed via  $^{31}\text{P}$  NMR) were precipitated using a  $\text{NaClO}_4$  solution (0.5 M in acetone,  $-20$   $^\circ\text{C}$ , 40 ml), and the precipitate was separated by centrifugation, washed with acetone ( $-20$   $^\circ\text{C}$ ,  $3 \times 10$  ml), and dried under high vacuum. The product **17** (40.0 mg, 46.2  $\mu\text{mol}$ , 57%) was isolated as a white solid.

**$^1\text{H-NMR}$  (400 MHz,  $\text{D}_2\text{O}$ )**  $\delta$  = 8.59 (s, 1H), 8.31 (s, 1H), 6.24 (d,  $J$  = 6.4 Hz, 1H), 4.99 (ddd,  $J$  = 8.5, 5.0, 3.0 Hz, 1H), 4.89 (ddd,  $J$  = 6.3, 5.1, 1.2 Hz, 1H), 4.62 (ddd,  $J$  = 2.9, 2.9, 2.9 Hz, 1H), 4.30 (mc, 2H), AB-Signal ( $\delta\text{A}$  = 3.97,  $\delta\text{B}$  = 3.94,  $J\text{AB}$  = 6.4 Hz, 2H), 2.27-2.23 (m, 1H), 2.18 (ddd,  $J$  = 7.3, 7.3, 2.6 Hz, 2H), 1.75-1.62 (m, 2H) ppm.

**$^{31}\text{P}\{^1\text{H}\}$ -NMR (162 MHz,  $\text{D}_2\text{O}$ )**  $\delta = -5.45$  (d,  $J = 22.0$  Hz),  $-10.62$  (d,  $J = 21.3$  Hz),  $-10.76$  (d,  $J = 18.2$  Hz),  $-11.18$  (d,  $J = 17.4$  Hz),  $-22.55$  (dd,  $J = 18.3, 18.3$  Hz) ppm.

**$^{13}\text{C}\{^1\text{H}\}$ -NMR (101 MHz,  $\text{D}_2\text{O}$ )**  $\delta = 155.7, 153.0, 149.4, 140.0, 118.7, 86.7, 84.9, 83.5$  (dd,  $J = 9.3, 4.2$  Hz),  $74.9$  (d,  $J = 5.2$  Hz),  $73.8, 69.1, 65.5$  (d,  $J = 5.4$  Hz),  $65.2$  (d,  $J = 5.9$  Hz),  $28.8$  (d,  $J = 7.2$  Hz),  $14.1$  (d,  $J = 2.9$  Hz) ppm.

**HRMS (ESI-):**  $m/z$  for  $\text{C}_{15}\text{H}_{23}\text{N}_5\text{O}_{19}\text{P}_5^-$   $[\text{M}-\text{H}]^-$  calcd. 731.9680, found 731.9679.

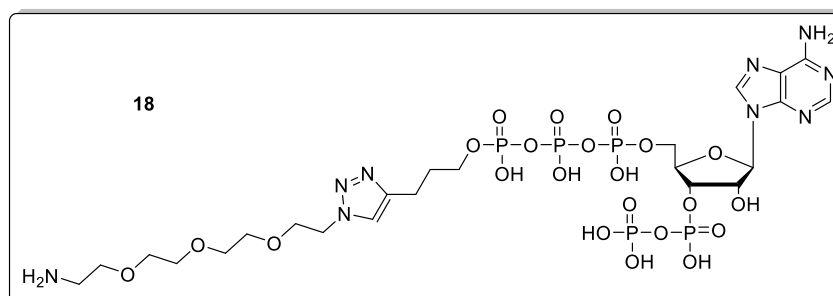

The sodium salt of pentynyl-pppApp (**27**) (20.0 mg, 23.1  $\mu\text{mol}$ , 1.0 eq.) sodium ascorbate (46.0 mg, 231  $\mu\text{mol}$ , 10 eq.) and 1-amino-11-azido-3,6,9-trioxaundecane (11.4  $\mu\text{l}$ , 10.1 mg, 46.2  $\mu\text{mol}$ , 2.0 eq.) were dissolved in water (1.5 ml) and PBS 10 $\times$  buffer (200  $\mu\text{l}$ ) and degassed for 10 min. A premixed solution of tris((1-hydroxy-propyl-1*H*-1,2,3-triazol-4-yl)methyl)amine (THPTA) (5.0 mg, 11.6  $\mu\text{mol}$ , 0.5 eq.) and  $\text{CuSO}_4$  (115  $\mu\text{l}$  of a 20 mM stock solution) was added, and the mixture was stirred for 1 h at room temperature. A small spatula tip of Chelex 100 was added. Afterwards,  $\text{H}_2\text{O}$  (35 ml) was added. The crude product was purified by strong ion-exchange chromatography (Q-Sepharose) using an Äkta system and a  $\text{NaClO}_4$  buffer (110–130 mM). The product-containing fractions (analyzed via HPLC-UV) were precipitated using an 8-fold volume of  $\text{NaClO}_4$  solution ( $-20$   $^\circ\text{C}$ , 500 mM in acetone). The resulting solid was separated by centrifugation, washed with acetone ( $-20$   $^\circ\text{C}$ ,  $3 \times 10$  ml), and dried under high vacuum for 2 h. The product **18** (7.7 mg, 7.1  $\mu\text{mol}$ , 31%) was isolated as a white solid.

**$^1\text{H}$  NMR (400 MHz,  $\text{D}_2\text{O}$ )**  $\delta = 8.55$  (s, 1H), 8.23 (s, 1H), 7.66 (s, 1H), 6.17 (d,  $J = 6.4$  Hz, 1H), 5.04–4.93 (m, 1H), 4.61 (mc, 1H), 4.53 (dd,  $J = 5.0, 5.0$  Hz, 2H), 4.30 (mc, 2H), 3.99 – 3.89 (m, 4H), 3.74 (dd,  $J = 5.2, 5.2$  Hz, 2H), 3.66–3.58 (m, 6H), 3.58–3.50 (m, 2H), 3.21 (dd,  $J = 5.8, 4.6$  Hz, 2H), 2.58 (dd,  $J = 6.5, 6.5$  Hz, 2H), 1.77 (dddd,  $J = 6.5, 6.5, 6.5, 6.4$  Hz, 2H) ppm.

**$^{31}\text{P}\{^1\text{H}\}$ -NMR (162 MHz,  $\text{D}_2\text{O}$ )**  $\delta = -5.60$  (d,  $J = 21.9$  Hz),  $-10.76$  (d,  $J = 21.9$  Hz),  $-10.83$  (d,  $J = 18.2$  Hz),  $-11.24$  (d,  $J = 17.1$  Hz),  $-22.70$  (dd,  $J = 18.2, 18.2$  Hz) ppm.

**$^{13}\text{C}\{^1\text{H}\}$ -NMR (101 MHz,  $\text{D}_2\text{O}$ )**  $\delta = 155.5, 152.8, 149.2, 147.4, 139.9, 123.2, 118.4, 86.6, 83.5$  (dd,  $J = 9.3, 4.2$  Hz),  $74.9$  (d,  $J = 5.2$  Hz),  $73.9$  (d,  $J = 4.3$  Hz),  $69.7, 69.5, 69.5, 69.4, 68.7, 66.5, 65.6$  (d,  $J = 5.4$  Hz),  $65.5$  (d,  $J = 5.9$  Hz),  $49.8, 39.0, 29.2$  (d,  $J = 7.7$  Hz),  $20.9$  ppm.

**HRMS (ESI-):**  $m/z$  for  $\text{C}_{23}\text{H}_{41}\text{N}_9\text{O}_{22}\text{P}_5^-$   $[\text{M}-\text{H}]^-$  calcd. 950.1060, found 950.1055.

### 3.6. Synthesis of fluorescence sensor probe

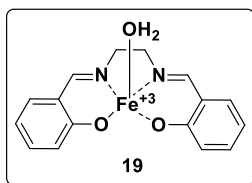

Fe-Sal Complex **19** was prepared according to the reported procedure. Analytical data were identical to literature.<sup>7</sup>

## 4. Spectroscopic studies- MSN sensing

### 4.1. Materials and Methods

#### General Spectroscopic Methods

UV/Vis absorption spectra were recorded on a Shimadzu UV-1900i spectrophotometer using quartz cuvettes with a path length of 1 cm. Fluorescence emission spectra were recorded on a JASCO FP-8200 spectrofluorometer or, where indicated, on a Tecan Spark 10M microplate reader using black 96-well plates (Thermo Fisher Scientific, Nunclon). All measurements were performed at room temperature unless stated otherwise. Tris buffer (10 mM, pH 7.4) was used for all spectroscopic experiments. Stock solutions of probe 1 and analytes were prepared in water and diluted immediately prior to use.

#### UV/Vis Absorption Measurements

UV/Vis absorption experiments were performed using a stock solution of probe **19** (100  $\mu\text{M}$ ). The final concentration of 1 in the measurement solution was 100  $\mu\text{M}$  in Tris buffer (10 mM, pH 7.4). Sodium salts of the respective alarmone nucleotides were added from aqueous stock solutions to afford the indicated equivalents. After incubation for 40 min, absorption spectra were recorded in the range of 250–600 nm.

#### Fluorescence Emission Measurements

Fluorescence measurements were performed using a stock solution of probe **19** (100  $\mu\text{M}$ ). The final concentration of 1 in the measurement solution was 50  $\mu\text{M}$  in Tris buffer (10 mM, pH 7.4). Alarmone nucleotides were added from aqueous stock solutions to afford the indicated equivalents. After incubation for 40 min, fluorescence emission spectra were recorded upon excitation at  $\lambda_{\text{ex}} = 375$  nm.

#### Time-resolved Fluorescence Measurements

For time-resolved fluorescence experiments, probe **19** (50  $\mu\text{M}$ ) was incubated with 10 equivalents of the respective alarmone nucleotide in Tris buffer (10 mM, pH 7.4). Fluorescence emission spectra were recorded at defined time points over a period of up to 70 min with excitation at  $\lambda_{\text{ex}} = 375$  nm and  $\lambda_{\text{em}} = 510$  nm.

#### Fluorescence Titration Experiments

Fluorescence titration experiments were conducted by incremental addition of alarmone nucleotides (1–10 equivalents) to a solution of probe **19** (50  $\mu\text{M}$ ) in Tris buffer (10 mM, pH 7.4). After incubation for 40 min, fluorescence emission spectra were recorded at  $\lambda_{\text{ex}} = 375$  nm and  $\lambda_{\text{em}} = 510$  nm.

#### Selectivity Experiments

Selectivity studies were performed by incubating probe **19** (80  $\mu\text{M}$ ) with various phosphate species and nucleotides (5.0 equivalents each) in Tris buffer (10 mM, pH 7.4). Measurements were conducted in black 96-well plates with a total volume of 200  $\mu\text{L}$  per well. Fluorescence emission intensities at 520 nm were recorded after 40 min incubation ( $\lambda_{\text{ex}} = 375$  nm). All measurements were performed in triplicate, and data are reported as mean  $\pm$  standard deviation.

#### Plate-Reader Measurements

Plate-reader-based fluorescence measurements were performed using a Tecan Spark 10M microplate reader. Emission spectra and fluorescence intensities were recorded in black 96-well plates at  $\lambda_{\text{ex}} = 375$  nm under otherwise identical buffer and concentration conditions as described above.

## 4.2. Time-Dependent Fluorescence Response

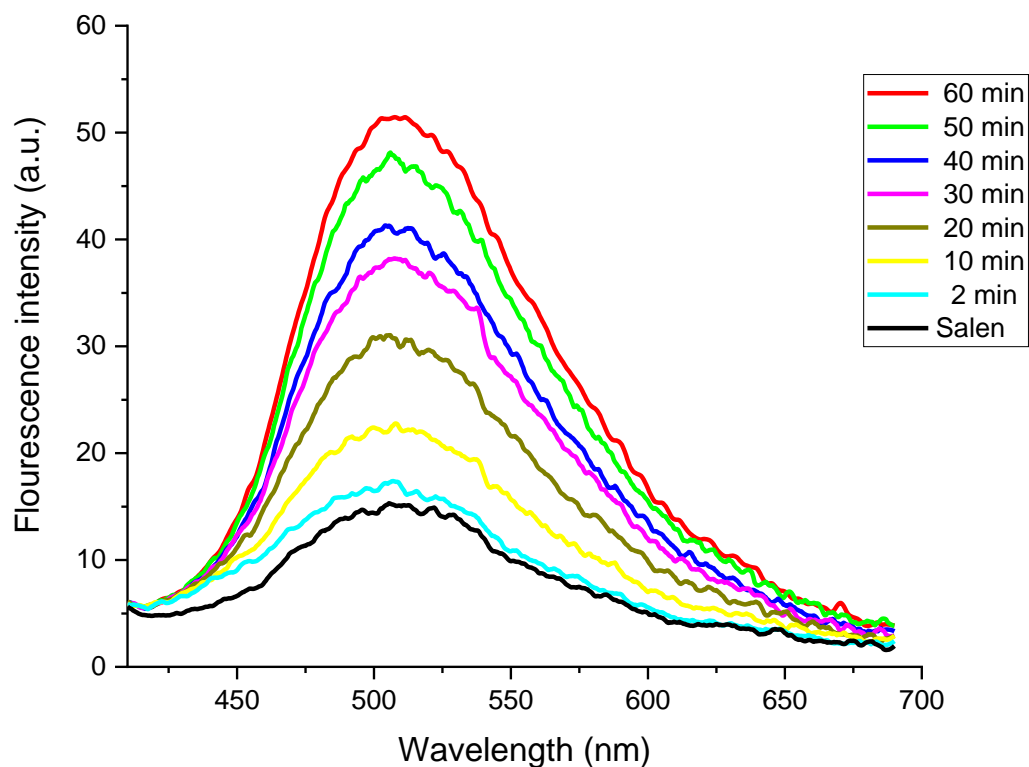

**Figure S3.** Time-dependent fluorescence emission spectra of probe **19** (50  $\mu\text{M}$ ) recorded after incubation with ppGpp (10 equiv) in Tris buffer (10 mM, pH 7.4). Emission spectra were recorded at the indicated time points (2–60 min) upon excitation at  $\lambda_{\text{ex}} = 375$  nm and  $\lambda_{\text{em}} = 510$  nm.

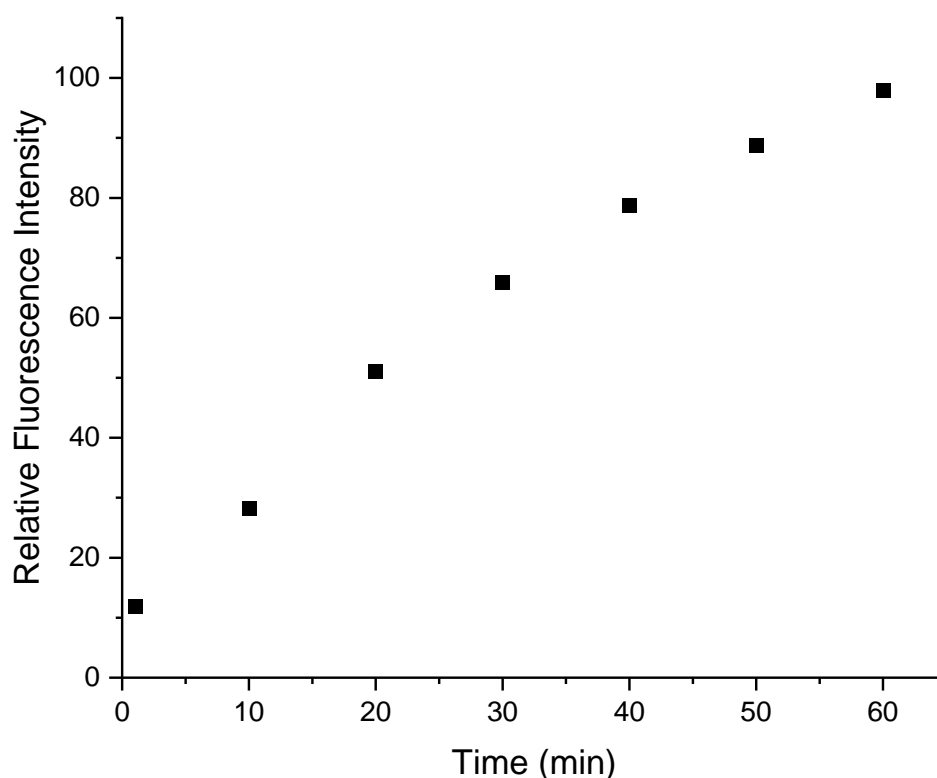

**Figure S4.** Time-dependent fluorescence emission spectra of probe **19** (50  $\mu\text{M}$ ) in the presence of pppApp (10 equiv) in Tris buffer (10 mM, pH 7.4). Spectra were recorded at the indicated time points (2–70 min) upon excitation at  $\lambda_{\text{ex}} = 375$  nm and  $\lambda_{\text{em}} = 510$  nm.

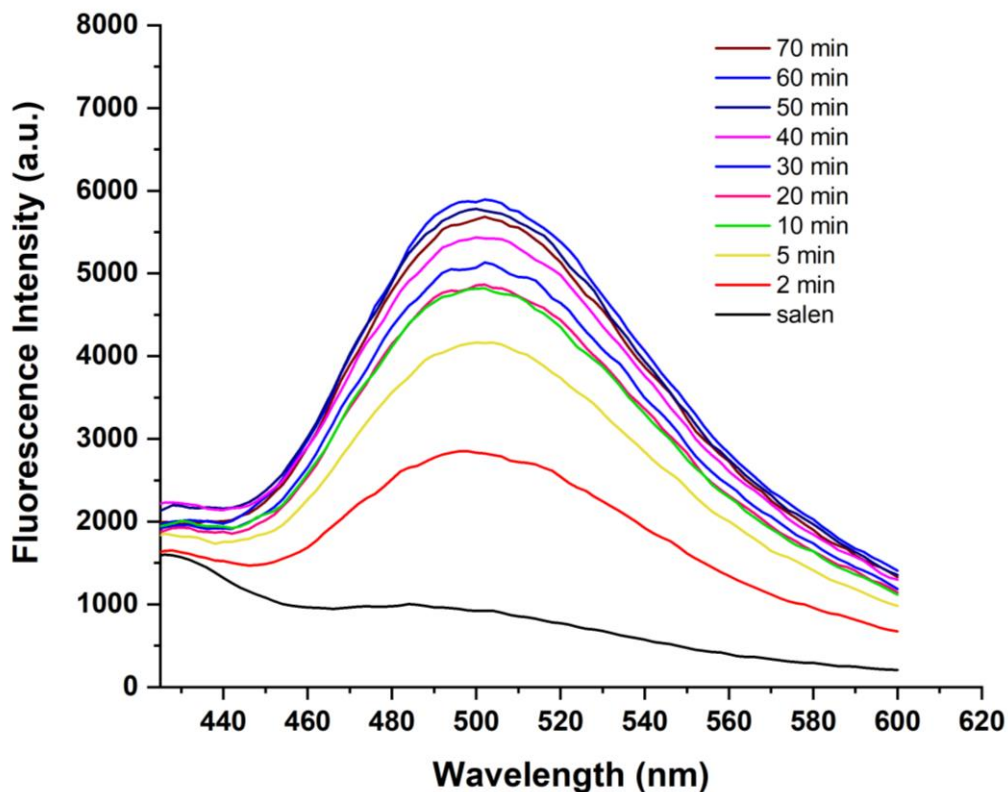

**Figure S5.** Time-dependent evolution of the fluorescence emission profile of probe **19** (50  $\mu\text{M}$ ) in the presence of ppApp (10 equiv), recorded using a plate-reader setup. Emission spectra were collected at the indicated time points ( $\lambda_{\text{ex}} = 375$  nm and  $\lambda_{\text{em}} = 510$  nm).

#### 4.3. Fluorescence Titration and Concentration Dependence

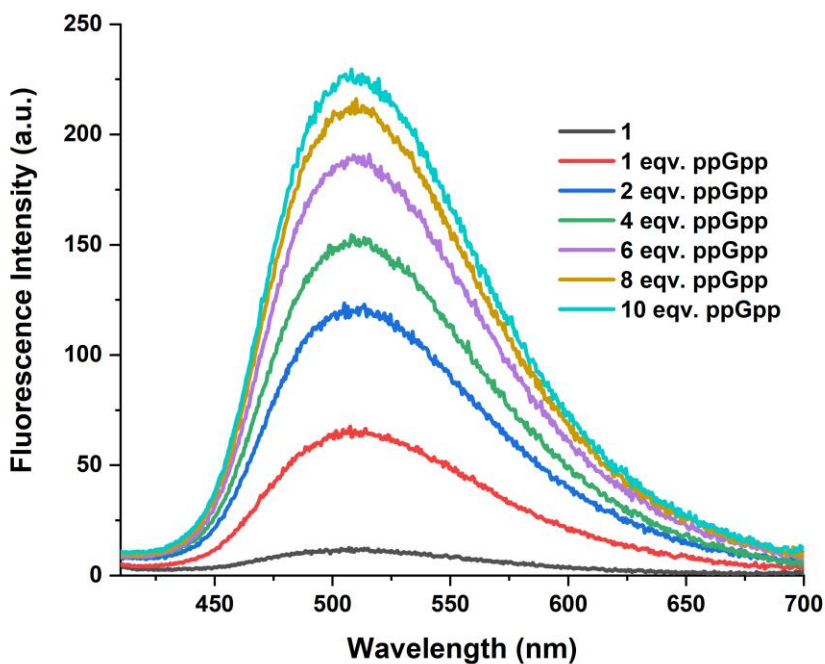

**Figure S6.** Fluorescence titration of probe **19** (50  $\mu\text{M}$ ) with increasing equivalents of ppGpp (1–10 equiv) in Tris buffer (10 mM, pH 7.4). Emission spectra were recorded after 40 min incubation ( $\lambda_{\text{ex}} = 375$  nm and  $\lambda_{\text{em}} = 510$  nm).

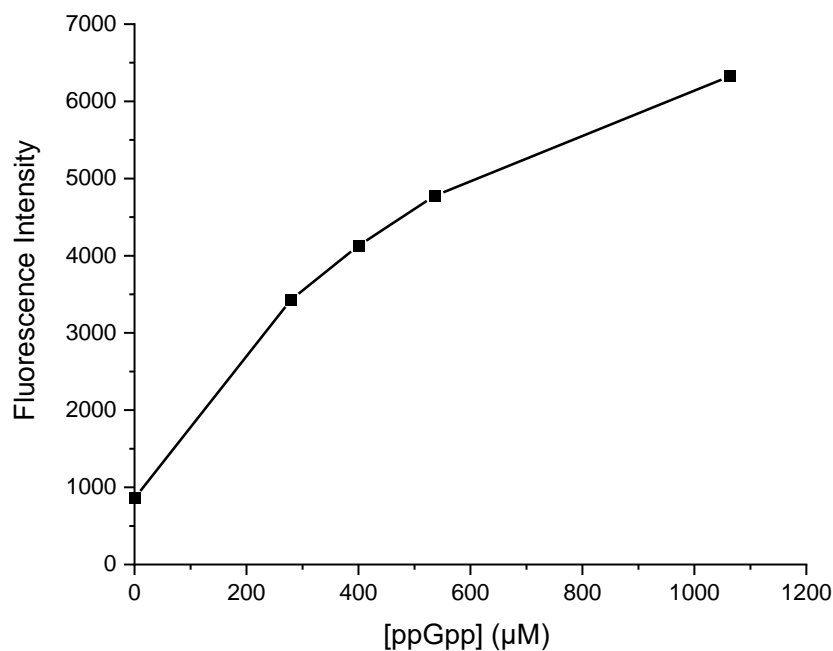

**Figure S7.** Concentration-dependent fluorescence response of probe **19** (50  $\mu\text{M}$ ) toward ppGpp. Fluorescence intensity at 510 nm is plotted as a function of ppGpp concentration after 40 min incubation in Tris buffer (10 mM, pH 7.4) ( $\lambda_{\text{ex}} = 375$  nm and  $\lambda_{\text{em}} = 510$  nm).

#### 4.4. Selectivity toward Phosphate Species

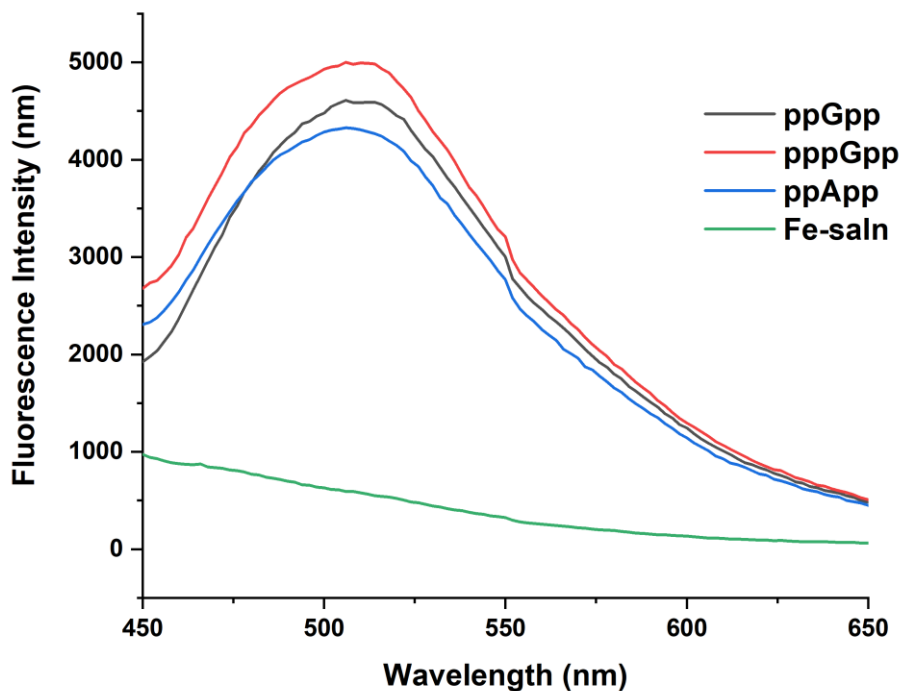

**Figure S8.** Comparison of fluorescence emission spectra of probe **19** (50  $\mu\text{M}$ ) in the presence of ppGpp, pppGpp, and ppApp (10 equiv each) in Tris buffer (10 mM, pH 7.4). The emission spectrum of Fe-Sal alone is shown for comparison ( $\lambda_{\text{ex}} = 375$  nm and  $\lambda_{\text{em}} = 510$  nm).

#### 4.5. Relative fluorescence intensity of Salen complex with different phosphate compounds

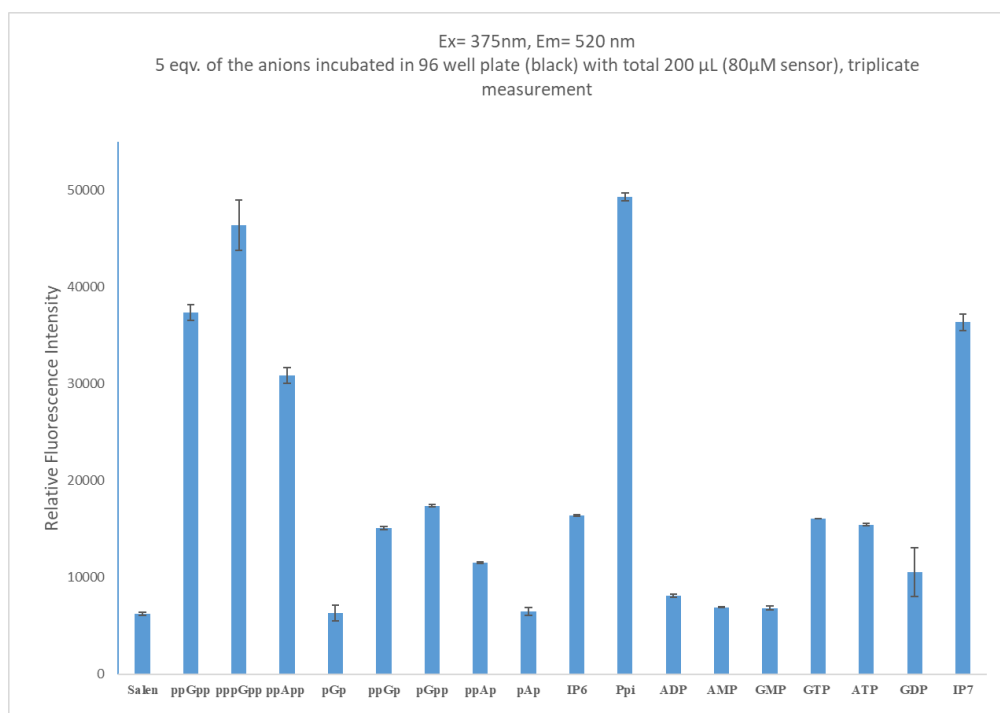

**Figure S9.** Selectivity of probe **19** toward different analytes. Normalized fluorescence emission intensity at 520 nm of **19** (80  $\mu$ M) after incubation with various anions (5.0 equiv) in Tris buffer (10 mM, pH 7.4) for 40 min. Measurements were performed in a 96-well plate format (n = 3; mean  $\pm$  SD).

## 5. DFT-Studies

### General remarks

All DFT calculations have been carried out using Gaussian16.<sup>8</sup> All geometries were optimized in the gas phase using the UB3LYP<sup>9</sup> functional in combination with the def2SVP basis set<sup>10</sup> for all atoms except iron for which the SDD<sup>11</sup> pseudopotentials were applied. High and low spin complexes of iron(III) were considered by a multiplicity of 6 and 2 for all iron complexes in separate calculations. In all cases the ultrafine integral grid was employed (int=grid=ultrafine), moreover, we used the scf=xqc keyword for all structures. During the geometry optimization we considered the solvent water by the use of the IEFPCM model<sup>12</sup> and the dispersion energies were considered by the use of the Grimme D3 correction together with Becke-Johnson damping (keyword EmpiricalDispersion=GD3BJ).<sup>13</sup> Frequency calculations were performed in order to obtain thermal corrections at 298 K. All optimized species showed no imaginary frequencies during vibrational analysis.

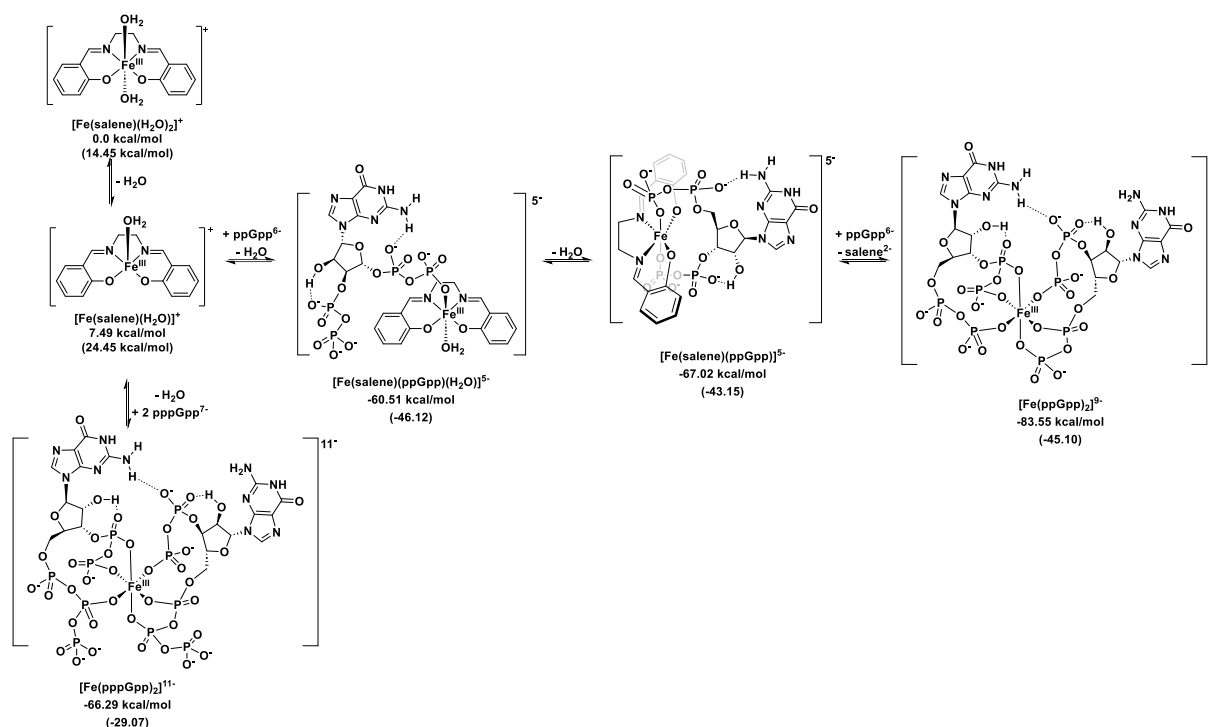

**Figure S11** Relative  $\Delta G$  values (UB3LYP/def2SVP/SDD/D3BJ/IEFPCM=water) of all considered species in kcal/mol. First the  $\Delta G$  values of the high spin complex is listed and the  $\Delta G$  values for the low spin complex is reported in brackets.

## Atomic coordinates

[Fe(salene)(H<sub>2</sub>O)<sub>2</sub>]<sup>+</sup> (multiplicity = 6)

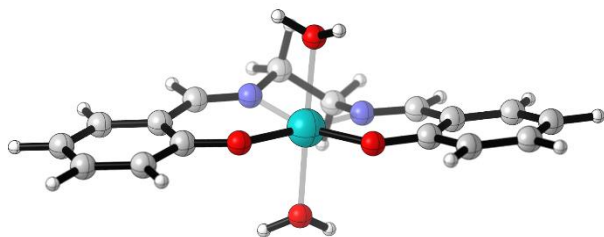

|   |            |            |            |
|---|------------|------------|------------|
| C | -5.0831880 | -2.1106693 | -0.1131952 |
| C | -3.7069040 | -2.2900803 | -0.0561092 |
| C | -2.8325340 | -1.1833543 | 0.0448448  |
| C | -3.4020500 | 0.1302687  | 0.0930388  |
| C | -4.8070880 | 0.2766247  | 0.0332538  |
| C | -5.6465220 | -0.8225903 | -0.0700772 |
| H | -5.7340690 | -2.9848643 | -0.1933702 |
| H | -3.2645090 | -3.2873733 | -0.0898902 |
| H | -5.2272850 | 1.2848547  | 0.0716128  |
| H | -6.7286800 | -0.6902523 | -0.1159502 |
| O | -1.5360410 | -1.3902093 | 0.0927898  |
| C | -2.6055610 | 1.3292027  | 0.2148838  |
| H | -3.1728020 | 2.2726947  | 0.2617588  |
| N | -1.3178640 | 1.3830927  | 0.2786358  |
| C | -0.6337830 | 2.6621247  | 0.4256688  |
| H | -1.2896440 | 3.5091587  | 0.1696198  |
| H | -0.3262740 | 2.7759327  | 1.4792048  |
| C | 0.6098570  | 2.6450867  | -0.4617872 |
| H | 1.2633310  | 3.5044677  | -0.2434432 |
| H | 0.3012090  | 2.7079147  | -1.5190252 |
| C | 2.5890230  | 1.3242637  | -0.2365492 |

|    |            |            |            |
|----|------------|------------|------------|
| H  | 3.1532650  | 2.2657937  | -0.3329202 |
| N  | 1.2992440  | 1.3757627  | -0.2631652 |
| C  | 3.3889720  | 0.1296307  | -0.1005062 |
| C  | 4.7949000  | 0.2777487  | -0.0640642 |
| C  | 2.8205090  | -1.1837393 | -0.0241522 |
| C  | 5.6360190  | -0.8191753 | 0.0457408  |
| H  | 5.2137850  | 1.2853597  | -0.1258282 |
| C  | 3.6973570  | -2.2883163 | 0.0815158  |
| C  | 5.0738770  | -2.1068943 | 0.1172578  |
| H  | 6.7186630  | -0.6859973 | 0.0741288  |
| H  | 3.2561430  | -3.2851603 | 0.1366428  |
| H  | 5.7265900  | -2.9792793 | 0.2022798  |
| O  | 1.5242970  | -1.3908873 | -0.0528932 |
| Fe | -0.0057420 | -0.2728533 | 0.0302098  |
| O  | 0.2233040  | -0.2492283 | 2.1831728  |
| H  | -0.4343880 | 0.2305527  | 2.7101578  |
| H  | 1.0874240  | -0.0523103 | 2.5769588  |
| H  | 0.5231940  | -0.2212583 | -2.6643442 |
| H  | -0.8616710 | -0.8888363 | -2.4688632 |
| O  | -0.2843660 | -0.1872073 | -2.1272442 |

|                      |          |
|----------------------|----------|
| <b>E/hartree</b>     | -1154.22 |
| <b>E+zvp/hartree</b> | -1153.89 |
| <b>G/hartree</b>     | -1153.95 |

[Fe(salene)(H<sub>2</sub>O)<sub>2</sub>]<sup>+</sup> (multiplicity = 2)

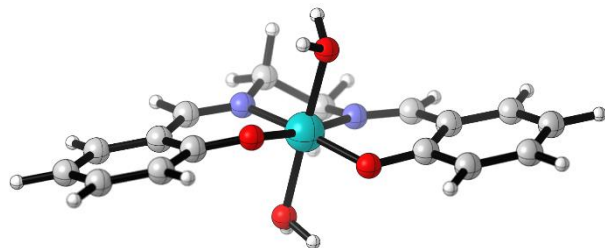

|   |            |            |            |
|---|------------|------------|------------|
| C | -4.7250725 | -2.2854344 | 0.0081309  |
| C | -3.3538285 | -2.3406134 | 0.2016479  |
| C | -2.5687955 | -1.1593544 | 0.2212689  |
| C | -3.2447905 | 0.0955806  | 0.0590259  |
| C | -4.6507295 | 0.1164526  | -0.1225851 |
| C | -5.3890975 | -1.0523754 | -0.1593831 |
| H | -5.2992555 | -3.2152414 | -0.0135801 |
| H | -2.8395675 | -3.2940934 | 0.3355579  |
| H | -5.1460005 | 1.0843356  | -0.2342941 |
| H | -6.4696775 | -1.0224934 | -0.3080271 |
| O | -1.2796565 | -1.2606314 | 0.4254949  |
| C | -2.5522925 | 1.3484766  | 0.1519459  |
| H | -3.1716695 | 2.2562076  | 0.1800039  |
| N | -1.2670475 | 1.4875216  | 0.2291809  |
| C | -0.6435955 | 2.7982206  | 0.4099909  |
| H | -1.3206815 | 3.6105476  | 0.1069749  |
| H | -0.4068865 | 2.9353036  | 1.4787259  |
| C | 0.6436835  | 2.7981216  | -0.4098691 |
| H | 1.3207525  | 3.6104656  | -0.1068611 |
| H | 0.4071365  | 2.9350346  | -1.4786571 |
| C | 2.5523565  | 1.3484376  | -0.1518771 |

|    |            |            |            |
|----|------------|------------|------------|
| H  | 3.1716555  | 2.2562116  | -0.1802651 |
| N  | 1.2670775  | 1.4874066  | -0.2287631 |
| C  | 3.2449555  | 0.0956166  | -0.0590111 |
| C  | 4.6509405  | 0.1165136  | 0.1222229  |
| C  | 2.5688805  | -1.1593234 | -0.2209991 |
| C  | 5.3893055  | -1.0523174 | 0.1589319  |
| H  | 5.1462355  | 1.0844096  | 0.2337309  |
| C  | 3.3539365  | -2.3405884 | -0.2015211 |
| C  | 4.7252235  | -2.2853834 | -0.0083511 |
| H  | 6.4699245  | -1.0224454 | 0.3072979  |
| H  | 2.8396595  | -3.2940864 | -0.3352501 |
| H  | 5.2994115  | -3.2151904 | 0.0132859  |
| O  | 1.2797485  | -1.2605504 | -0.4249641 |
| Fe | -0.0000745 | 0.0477016  | 0.0002109  |
| O  | 0.5529645  | -0.0743444 | 1.9237229  |
| H  | -0.0146995 | -0.7640034 | 2.3118279  |
| H  | 0.4437125  | 0.7113556  | 2.4832339  |
| H  | -0.4462235 | 0.7116836  | -2.4829731 |
| H  | 0.0151285  | -0.7629884 | -2.3119551 |
| O  | -0.5530475 | -0.0741444 | -1.9232261 |

|                      |          |
|----------------------|----------|
| <b>E/hartree</b>     | -1154.20 |
| <b>E+zvp/hartree</b> | -1153.88 |
| <b>G/hartree</b>     | -1153.92 |

[Fe(salene)(H<sub>2</sub>O)]<sup>+</sup> (multiplicity = 6)

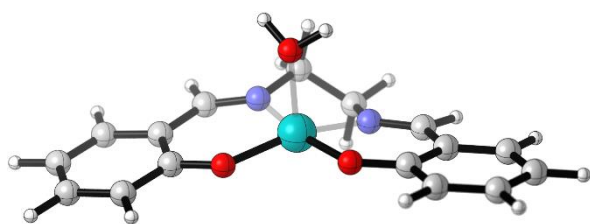

|                      |          |
|----------------------|----------|
| <b>E/hartree</b>     | -1077.82 |
| <b>E+zvp/hartree</b> | -1077.52 |
| <b>G/hartree</b>     | -1077.57 |

|   |            |            |            |    |            |            |            |
|---|------------|------------|------------|----|------------|------------|------------|
| C | 4.9970999  | -2.1924309 | 0.4441483  | H  | -0.2699981 | 2.6421061  | 1.6669463  |
| C | 3.6190359  | -2.3368549 | 0.3455763  | C  | -2.5528041 | 1.2877521  | 0.4516983  |
| C | 2.7829809  | -1.2094209 | 0.1837273  | H  | -3.1046311 | 2.2151071  | 0.6727173  |
| C | 3.3884869  | 0.0869681  | 0.1305053  | N  | -1.2639891 | 1.3501911  | 0.3606993  |
| C | 4.7940099  | 0.1987911  | 0.2410183  | C  | -3.3614121 | 0.1030901  | 0.3071423  |
| C | 5.5972999  | -0.9210029 | 0.3924053  | C  | -4.7628391 | 0.2338321  | 0.4425933  |
| H | 5.6209009  | -3.0813939 | 0.5653323  | C  | -2.7997301 | -1.1914219 | 0.0662473  |
| H | 3.1481309  | -3.3205449 | 0.3869023  | C  | -5.6020311 | -0.8660839 | 0.3469503  |
| H | 5.2420339  | 1.1948091  | 0.2023843  | H  | -5.1790801 | 1.2267961  | 0.6296883  |
| H | 6.6806169  | -0.8179989 | 0.4724313  | C  | -3.6712261 | -2.3000929 | -0.0215587 |
| O | 1.4826309  | -1.3826349 | 0.0855683  | C  | -5.0440091 | -2.1365839 | 0.1147743  |
| C | 2.6230529  | 1.2999691  | -0.0158947 | H  | -6.6815241 | -0.7486579 | 0.4540663  |
| H | 3.2017179  | 2.2368671  | 0.0053423  | H  | -3.2322441 | -3.2830609 | -0.2008807 |
| N | 1.3409379  | 1.3731821  | -0.1631637 | H  | -5.6969331 | -3.0096979 | 0.0414773  |
| C | 0.6721329  | 2.6640761  | -0.2735927 | O  | -1.5055711 | -1.3737389 | -0.0703877 |
| H | 1.3321039  | 3.4947191  | 0.0208243  | Fe | 0.0040539  | -0.2550589 | -0.1783927 |
| H | 0.3748779  | 2.8183261  | -1.3248037 | O  | -0.0647711 | -0.2217179 | -2.2744837 |
| C | -0.5744741 | 2.6152911  | 0.6068783  | H  | 0.6074759  | 0.2468081  | -2.7941437 |
| H | -1.2304111 | 3.4789791  | 0.4162633  | H  | -0.9119001 | -0.1192639 | -2.7370077 |

[Fe(salene)(H<sub>2</sub>O)]<sup>+</sup> (multiplicity = 2)

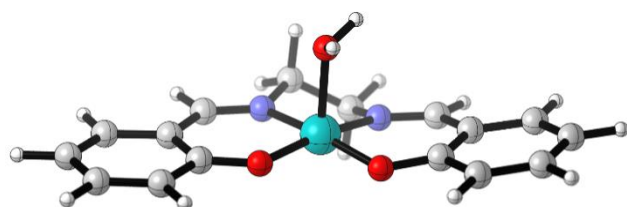

|                      |          |
|----------------------|----------|
| <b>E/hartree</b>     | -1077.80 |
| <b>E+zvp/hartree</b> | -1077.50 |
| <b>G/hartree</b>     | -1077.55 |

|   |            |            |            |    |            |            |            |
|---|------------|------------|------------|----|------------|------------|------------|
| C | -4.8042265 | -2.2656975 | -0.1915156 | H  | 0.4757645  | 2.8597055  | -1.7321596 |
| C | -3.4218135 | -2.3295815 | -0.2545276 | C  | 2.5478205  | 1.3498495  | -0.3099896 |
| C | -2.6379185 | -1.1488735 | -0.2156076 | H  | 3.1577895  | 2.2613115  | -0.3771566 |
| C | -3.3160955 | 0.1081615  | -0.1121316 | N  | 1.2578125  | 1.4767655  | -0.3734986 |
| C | -4.7331905 | 0.1380245  | -0.0539506 | C  | 3.2471305  | 0.1063725  | -0.1873506 |
| C | -5.4747245 | -1.0277285 | -0.0909416 | C  | 4.6550335  | 0.1267055  | -0.0229726 |
| H | -5.3835435 | -3.1919585 | -0.2187276 | C  | 2.5652815  | -1.1483925 | -0.3021506 |
| H | -2.9006265 | -3.2851725 | -0.3331106 | C  | 5.3828865  | -1.0470045 | 0.0431584  |
| H | -5.2311875 | 1.1075605  | 0.0244054  | H  | 5.1579315  | 1.0939225  | 0.0505954  |
| H | -6.5641905 | -0.9939435 | -0.0417736 | C  | 3.3364055  | -2.3357335 | -0.2489826 |
| O | -1.3348355 | -1.2567265 | -0.2879156 | C  | 4.7099075  | -2.2816845 | -0.0731236 |
| C | -2.6020545 | 1.3458325  | -0.0611136 | H  | 6.4653935  | -1.0207035 | 0.1772204  |
| H | -3.2063405 | 2.2600455  | 0.0173854  | H  | 2.8131305  | -3.2886465 | -0.3438826 |
| N | -1.3105505 | 1.4784875  | -0.0852166 | H  | 5.2796365  | -3.2129545 | -0.0254336 |
| C | -0.6975275 | 2.8009635  | 0.0815514  | O  | 1.2691005  | -1.2440995 | -0.4816746 |
| H | -1.3536275 | 3.5952325  | -0.3027316 | Fe | -0.0215495 | 0.0494425  | -0.1672076 |
| H | -0.5407425 | 2.9769405  | 1.1590164  | O  | 0.1559365  | -0.0335575 | 1.8532154  |
| C | 0.6373915  | 2.7779925  | -0.6447236 | H  | 0.8210225  | 0.5304415  | 2.2811324  |
| H | 1.2902485  | 3.6046165  | -0.3283406 | H  | 0.3091205  | -0.9359165 | 2.1802314  |

[Fe(salene)(ppGpp)(H<sub>2</sub>O)]<sup>5-</sup> (multiplicity = 6)

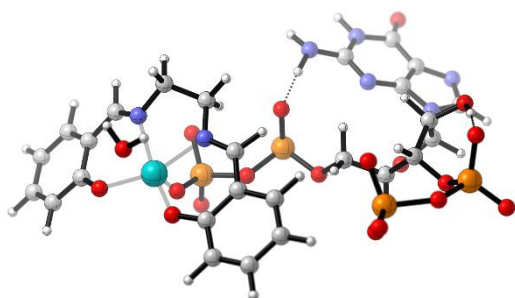

|                      |          |
|----------------------|----------|
| <b>E/hartree</b>     | -4383.10 |
| <b>E+zvp/hartree</b> | -4382.51 |
| <b>G/hartree</b>     | -4382.60 |

|    |            |            |            |   |            |            |            |
|----|------------|------------|------------|---|------------|------------|------------|
| C  | 8.5532244  | 1.2887438  | 1.6644977  | H | -6.2523256 | 0.7874538  | 1.5368797  |
| C  | 7.8270254  | 0.1287158  | 1.4336527  | H | -3.5065416 | -1.1203892 | 2.1721807  |
| C  | 6.7265124  | 0.1060208  | 0.5354537  | H | -4.0685336 | -1.6655062 | -0.4375563 |
| C  | 6.4041994  | 1.3305178  | -0.1453853 | H | -4.5088436 | 0.6937018  | -0.9460873 |
| C  | 7.1709384  | 2.4905918  | 0.1073757  | O | -5.5556906 | -1.8161172 | 1.0174977  |
| C  | 8.2298574  | 2.4885398  | 1.0032617  | O | -6.4763856 | 0.0430338  | -0.8984673 |
| H  | 9.3878474  | 1.2667308  | 2.3707547  | H | -6.5930416 | -0.9426842 | -1.0772893 |
| H  | 8.0774184  | -0.8028842 | 1.9460977  | C | -2.2301396 | -0.2592512 | 0.6659997  |
| H  | 6.9088094  | 3.4090978  | -0.4257313 | H | -2.3181686 | 0.3242828  | -0.2596563 |
| H  | 8.8048394  | 3.3977918  | 1.1881367  | H | -1.8634406 | -1.2688102 | 0.4211147  |
| O  | 6.0709764  | -1.0075642 | 0.3466857  | C | -4.5363756 | 3.3254578  | 0.1242187  |
| C  | 5.3508884  | 1.4251778  | -1.1330763 | C | -6.5064416 | 3.3122118  | 1.1296627  |
| H  | 5.2783754  | 2.3896578  | -1.6623053 | C | -5.1161466 | 4.6035678  | 0.1569077  |
| N  | 4.5354554  | 0.4825778  | -1.4474923 | H | -7.3643526 | 2.8915108  | 1.6551357  |
| C  | 3.5299414  | 0.6688078  | -2.4781283 | C | -4.3904986 | 5.7021878  | -0.4178553 |
| H  | 3.4852454  | 1.7164268  | -2.8206463 | C | -2.6555466 | 3.9651588  | -0.9101663 |
| H  | 3.8043884  | 0.0437888  | -3.3469783 | H | -2.5750666 | 5.9949358  | -1.3336553 |
| C  | 2.1750404  | 0.2279268  | -1.9287633 | N | -5.4453926 | 2.5036468  | 0.7541397  |
| H  | 1.4324944  | 0.1390328  | -2.7390513 | N | -6.3481226 | 4.5658618  | 0.7867687  |
| H  | 1.8077794  | 0.9758138  | -1.2115323 | N | -3.3522136 | 2.9637268  | -0.3957523 |
| C  | 1.3513484  | -1.8464642 | -1.0861133 | N | -3.1456146 | 5.2578858  | -0.9273583 |
| H  | 0.3938524  | -1.5971342 | -1.5726853 | N | -1.4498066 | 3.7316978  | -1.4585943 |
| N  | 2.3394014  | -1.0313022 | -1.2170873 | H | -0.9717626 | 2.8440918  | -1.1486603 |
| C  | 1.3593024  | -3.0907132 | -0.3457333 | H | -0.8604346 | 4.5265148  | -1.6767033 |
| C  | 0.1742254  | -3.8627882 | -0.3638353 | O | -4.6990336 | 6.8869448  | -0.5041983 |
| C  | 2.5002104  | -3.5650262 | 0.3878467  | O | -1.3340616 | 0.3959408  | 1.5567357  |
| C  | 0.0804014  | -5.0792042 | 0.3021567  | P | -0.1923226 | 1.4527848  | 1.0018097  |
| H  | -0.7139796 | -3.4891962 | -0.8878343 | O | 1.1388094  | 0.5924778  | 1.4358217  |
| C  | 2.3823134  | -4.8133162 | 1.0492357  | P | -6.2766096 | -3.0803742 | 0.2057167  |
| C  | 1.2021504  | -5.5478872 | 1.0065697  | O | -7.3997356 | -3.5549052 | 1.0930717  |
| H  | -0.8722156 | -5.6170992 | 0.2814997  | O | -5.1462376 | -4.2129762 | 0.0875987  |
| H  | 3.2531274  | -5.1737962 | 1.6020687  | O | -6.6169506 | -2.5328412 | -1.1917813 |
| H  | 1.1516374  | -6.5028382 | 1.5389237  | O | 2.8981564  | 2.2853048  | 0.5478337  |
| O  | 3.6278674  | -2.9043972 | 0.4708377  | O | -0.2861596 | 2.7310398  | 1.7918177  |
| Fe | 4.1602414  | -1.1336662 | -0.1015113 | P | 2.6915564  | 1.2393628  | 1.6290487  |
| O  | 4.9741474  | -2.3606052 | -1.9309413 | O | 2.8639914  | 1.6188228  | 3.0830657  |
| H  | 5.4536114  | -1.7494342 | -2.5101283 | P | -3.3730476 | -4.2118232 | 0.1138567  |
| H  | 4.2329064  | -2.6831902 | -2.4655643 | O | -3.0225296 | -3.6142392 | 1.4773557  |
| C  | -5.3341806 | 1.0779028  | 0.9935107  | O | -3.1058966 | -5.7146412 | -0.0505373 |
| O  | -4.1750666 | 0.8054648  | 1.7431717  | O | -2.9938176 | -3.3569102 | -1.1171243 |
| C  | -3.5931366 | -0.4496012 | 1.3077227  | O | -0.2778486 | 1.4935628  | -0.5255413 |
| C  | -4.5837676 | -1.0471692 | 0.3135767  | O | 3.5395784  | -0.0972312 | 1.3326957  |
| C  | -5.2426106 | 0.2114828  | -0.2724603 |   |            |            |            |

[Fe(salene)(ppGpp)(H<sub>2</sub>O)]<sup>5-</sup> (multiplicity = 2)

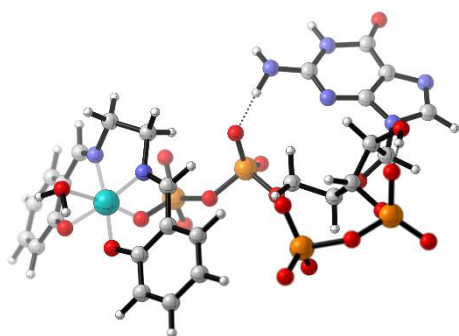

|                      |              |
|----------------------|--------------|
| <b>E/hartree</b>     | -4383.08455  |
| <b>E+zvp/hartree</b> | -4382.494343 |
| <b>G/hartree</b>     | -4382.580775 |

|    |            |            |            |   |            |            |            |
|----|------------|------------|------------|---|------------|------------|------------|
| C  | -8.4969596 | 0.8247193  | -1.9673212 | H | 6.2989364  | 0.6565843  | -1.5735812 |
| C  | -7.7032076 | -0.2310747 | -1.5464212 | H | 3.4665214  | -1.2147117 | -2.0678452 |
| C  | -6.6360426 | -0.0423907 | -0.6232482 | H | 4.1417934  | -1.7439497 | 0.4961168  |
| C  | -6.4322296 | 1.2906243  | -0.1227992 | H | 4.6573904  | 0.6097573  | 0.9788528  |
| C  | -7.2699536 | 2.3423313  | -0.5625302 | O | 5.5648434  | -1.9244447 | -1.0177212 |
| C  | -8.2853536 | 2.1308883  | -1.4815182 | O | 6.6032184  | -0.0960537 | 0.8484638  |
| H  | -9.2977906 | 0.6385933  | -2.6885002 | H | 6.6926904  | -1.0826287 | 1.0308338  |
| H  | -7.8673116 | -1.2431307 | -1.9233292 | C | 2.2932084  | -0.2877877 | -0.5241202 |
| H  | -7.0977766 | 3.3440303  | -0.1583092 | H | 2.4319814  | 0.3671203  | 0.3459328  |
| H  | -8.9144726 | 2.9573283  | -1.8173712 | H | 1.9410454  | -1.2734117 | -0.1794892 |
| O  | -5.9240636 | -1.0682007 | -0.2556692 | C | 4.6708434  | 3.2330283  | -0.1258482 |
| C  | -5.4473726 | 1.5812593  | 0.8878478  | C | 6.6250894  | 3.1692773  | -1.1601232 |
| H  | -5.4951206 | 2.5768583  | 1.3528408  | C | 5.2845704  | 4.4951723  | -0.1648142 |
| N  | -4.5461446 | 0.7591313  | 1.2968068  | H | 7.4636504  | 2.7267003  | -1.6986542 |
| C  | -3.6365326 | 1.0820803  | 2.3864938  | C | 4.5989414  | 5.6120723  | 0.4234508  |
| H  | -3.6073386 | 2.1663553  | 2.5749698  | C | 2.8217554  | 3.9238533  | 0.9335928  |
| H  | -4.0130226 | 0.5851733  | 3.2972068  | H | 2.8042644  | 5.9539833  | 1.3630988  |
| C  | -2.2563276 | 0.5480213  | 2.0248748  | N | 5.5480854  | 2.3888303  | -0.7711832 |
| H  | -1.6312906 | 0.4236283  | 2.9231108  | N | 6.5054864  | 4.4259553  | -0.8127612 |
| H  | -1.7460896 | 1.2351183  | 1.3380268  | N | 3.4839004  | 2.9035603  | 0.4100898  |
| C  | -1.4373776 | -1.5468137 | 1.2080028  | N | 3.3492224  | 5.2018533  | 0.9494908  |
| H  | -0.4815986 | -1.2646557 | 1.6717488  | N | 1.6133914  | 3.7243623  | 1.4882098  |
| N  | -2.4302106 | -0.7304097 | 1.3327218  | H | 1.1072234  | 2.8463063  | 1.1961378  |
| C  | -1.4556256 | -2.8103717 | 0.5158868  | H | 1.0518674  | 4.5333303  | 1.7260708  |
| C  | -0.2618876 | -3.5749887 | 0.5014698  | O | 4.9428574  | 6.7871283  | 0.5086248  |
| C  | -2.6389466 | -3.3309167 | -0.1119472 | O | 1.3523724  | 0.2991283  | -1.4181162 |
| C  | -0.2005546 | -4.8237967 | -0.1010022 | P | 0.2255294  | 1.3860553  | -0.8955482 |
| H  | 0.6567904  | -3.1869627 | 0.9580848  | O | -1.1154836 | 0.5075673  | -1.2470472 |
| C  | -2.5472766 | -4.6140537 | -0.7166502 | P | 6.2549844  | -3.2191287 | -0.2320312 |
| C  | -1.3618526 | -5.3355697 | -0.7108852 | O | 7.3335864  | -3.7387197 | -1.1488052 |
| H  | 0.7486424  | -5.3693607 | -0.1037232 | O | 5.0770064  | -4.2996177 | -0.0819252 |
| H  | -3.4490216 | -5.0103537 | -1.1897362 | O | 6.6535934  | -2.6890957 | 1.1571228  |
| H  | -1.3349886 | -6.3175947 | -1.1936532 | O | -2.8427676 | 2.2983473  | -0.5133092 |
| O  | -3.7879326 | -2.7082837 | -0.1373092 | O | 0.3073854  | 2.6198273  | -1.7547662 |
| Fe | -4.1220746 | -0.9026937 | 0.4389248  | P | -2.6640196 | 1.1519133  | -1.4928842 |
| O  | -4.9455066 | -1.9139747 | 2.1219358  | O | -2.8233176 | 1.4073023  | -2.9766792 |
| H  | -4.7265836 | -2.8121337 | 1.8133558  | P | 3.3065104  | -4.2344267 | -0.1698932 |
| H  | -5.8873506 | -1.8217447 | 1.8937638  | O | 3.0216884  | -3.6194777 | -1.5411232 |
| C  | 5.4049874  | 0.9635783  | -1.0001192 | O | 2.9763004  | -5.7273697 | -0.0258122 |
| O  | 4.2171044  | 0.7037953  | -1.7084362 | O | 2.9189084  | -3.3728007 | 1.0543438  |
| C  | 3.6168024  | -0.5275327 | -1.2258092 | O | 0.3454004  | 1.5077053  | 0.6266678  |
| C  | 4.6379054  | -1.1368267 | -0.2749632 | O | -3.5475476 | -0.1491607 | -1.1352432 |
| C  | 5.3480484  | 0.1063803  | 0.2754038  |   |            |            |            |

[Fe(salene)(ppGpp)]<sup>5-</sup> (multiplicity = 6)

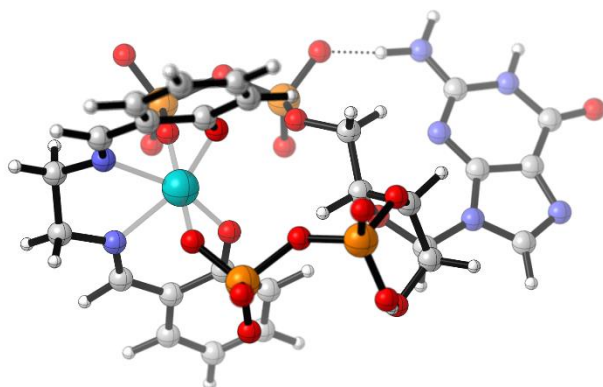

|                      |          |
|----------------------|----------|
| <b>E/hartree</b>     | -4306.73 |
| <b>E+zvp/hartree</b> | -4306.17 |
| <b>G/hartree</b>     | -4306.25 |

|   |            |            |            |    |            |            |            |
|---|------------|------------|------------|----|------------|------------|------------|
| C | 3.4840431  | 1.0220411  | 1.4383818  | O  | -3.1321629 | 1.1768261  | 0.6784278  |
| O | 2.6321501  | 0.0688821  | 0.8847438  | O  | -1.8691869 | 2.0690911  | 2.7493248  |
| C | 1.6819911  | 0.6772711  | -0.0273282 | O  | -3.1009889 | 3.6975811  | 1.1275478  |
| C | 2.1862281  | 2.1173521  | -0.1690432 | O  | 2.2738421  | -2.9050809 | -2.4809732 |
| C | 2.8065751  | 2.3865641  | 1.2195568  | O  | -2.4154859 | -4.4077139 | -2.2193462 |
| H | 3.5940171  | 0.8341531  | 2.5182988  | Fe | -2.6200499 | -0.5799059 | -0.0432562 |
| H | 0.6912431  | 0.6570741  | 0.4461678  | C  | -3.4257369 | 3.1398931  | -3.9050512 |
| H | 3.0324891  | 2.1125521  | -0.8810122 | C  | -2.6007479 | 2.2743401  | -3.2056722 |
| O | 1.2586501  | 3.0221261  | -0.7124672 | C  | -3.1220059 | 1.2052121  | -2.4134472 |
| O | 1.8892321  | 2.5419071  | 2.2580328  | C  | -4.5588459 | 1.0677741  | -2.3869142 |
| H | 1.2811291  | 3.3084731  | 2.0047408  | C  | -5.3681449 | 1.9569411  | -3.1303122 |
| C | 1.6130941  | -0.0424639 | -1.3617922 | C  | -4.8277129 | 2.9913451  | -3.8795442 |
| H | 2.6275071  | -0.3130319 | -1.6888012 | H  | -2.9787589 | 3.9528631  | -4.4852242 |
| H | 1.1849171  | 0.6836491  | -2.0759212 | H  | -1.5175109 | 2.4067861  | -3.2130642 |
| C | 5.3559461  | 0.1267181  | -0.1370252 | H  | -6.4530549 | 1.8136561  | -3.1011682 |
| C | 5.8935681  | 1.7461691  | 1.2758568  | H  | -5.4714229 | 3.6734401  | -4.4385892 |
| C | 6.7114711  | 0.4923851  | -0.2384912 | O  | -2.3196499 | 0.3969051  | -1.8103552 |
| H | 5.7507471  | 2.4833371  | 2.0661988  | C  | -5.2159229 | -0.0003599 | -1.6687052 |
| C | 7.5480961  | -0.1865539 | -1.1888992 | H  | -6.2944859 | -0.1260029 | -1.8781652 |
| C | 5.4674381  | -1.4571659 | -1.7316292 | N  | -4.6504359 | -0.7993839 | -0.8379552 |
| H | 7.3493601  | -1.6779909 | -2.5874422 | C  | -5.3835839 | -1.8693419 | -0.2007292 |
| N | 4.8382011  | 0.9549521  | 0.8420098  | H  | -6.4588339 | -1.8535889 | -0.4543002 |
| N | 7.0188211  | 1.5010651  | 0.6537438  | H  | -4.9546709 | -2.8261749 | -0.5434712 |
| N | 4.7195521  | -0.8212649 | -0.8438522 | C  | -5.1827389 | -1.7398639 | 1.3084368  |
| N | 6.8088981  | -1.1632899 | -1.8970062 | H  | -5.6066729 | -2.6110499 | 1.8385808  |
| N | 4.9247991  | -2.4158749 | -2.4948582 | H  | -5.7234039 | -0.8402429 | 1.6550378  |
| H | 3.8885941  | -2.6091739 | -2.4373332 | C  | -3.2946889 | -1.9627649 | 2.7172528  |
| H | 5.4800271  | -2.8703939 | -3.2079452 | H  | -3.9789619 | -2.4655339 | 3.4256518  |
| O | 8.7401831  | -0.0240599 | -1.4346752 | N  | -3.7669669 | -1.5678929 | 1.5872658  |
| O | 0.7560041  | -1.1635159 | -1.3504432 | C  | -1.9405499 | -1.8115319 | 3.1911488  |
| P | 1.2720351  | -2.7332319 | -1.3378702 | C  | -1.6439549 | -2.3157699 | 4.4810518  |
| O | -0.1153239 | -3.4242539 | -1.8404552 | C  | -0.9084019 | -1.1635029 | 2.4201468  |
| P | -0.0572059 | 3.7581071  | 0.0094968  | C  | -0.3810859 | -2.2096409 | 5.0396708  |
| O | 0.4258821  | 4.4071641  | 1.3106708  | H  | -2.4497419 | -2.8002099 | 5.0417728  |
| O | -0.9670569 | 2.4575111  | 0.3363098  | C  | 0.3870581  | -1.0766919 | 3.0217768  |
| O | -0.6276649 | 4.6306361  | -1.0721212 | C  | 0.6347261  | -1.5819999 | 4.2859268  |
| O | -1.4099619 | -4.4582129 | 0.1892358  | H  | -0.1743229 | -2.6043759 | 6.0365438  |
| O | 1.6743481  | -3.1719309 | 0.0470508  | H  | 1.1819151  | -0.6170239 | 2.4336228  |
| P | -1.6348009 | -3.7130879 | -1.1159162 | H  | 1.6416441  | -1.4959509 | 4.7064368  |
| O | -2.1908729 | -2.2498209 | -0.8789672 | O  | -1.0952259 | -0.6881229 | 1.2412558  |
| P | -2.3584019 | 2.3883311  | 1.3465878  | H  | 3.5409811  | 3.2139651  | 1.1735758  |

[Fe(salene)(ppGpp)]<sup>5-</sup> (multiplicity = 2)

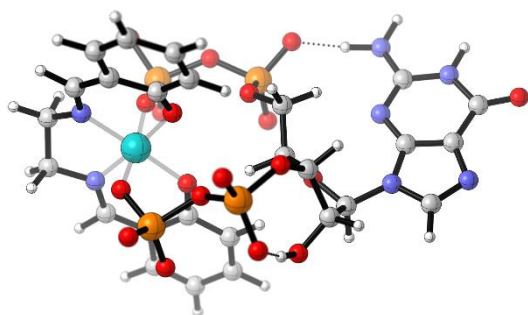

|                      |              |
|----------------------|--------------|
| <b>E/hartree</b>     | -4306.70029  |
| <b>E+zvp/hartree</b> | -4306.135215 |
| <b>G/hartree</b>     | -4306.214071 |

|   |            |            |            |    |            |            |            |
|---|------------|------------|------------|----|------------|------------|------------|
| C | 3.2389268  | 1.0727743  | 1.5148979  | O  | -3.3818962 | 1.2315703  | 0.5356599  |
| O | 2.3811008  | 0.0976223  | 1.0230169  | O  | -2.2090512 | 2.2388383  | 2.6282109  |
| C | 1.4773748  | 0.6365483  | 0.0158189  | O  | -3.3757352 | 3.7508683  | 0.8601749  |
| C | 1.9770318  | 2.0753583  | -0.1817691 | O  | 2.1699118  | -3.2541467 | -1.9817811 |
| C | 2.5649078  | 2.4185923  | 1.2074329  | O  | -2.6006852 | -4.4717787 | -1.8331011 |
| H | 3.3465198  | 0.9484483  | 2.6043319  | Fe | -2.7926742 | -0.5025377 | 0.0137639  |
| H | 0.4550308  | 0.6228063  | 0.4166509  | C  | -1.8682372 | 2.5797273  | -4.2262051 |
| H | 2.8402088  | 2.0467693  | -0.8731711 | C  | -1.4129212 | 1.8860263  | -3.1222981 |
| O | 1.0683158  | 2.9693643  | -0.7787461 | C  | -2.2602802 | 0.9892863  | -2.3863231 |
| O | 1.6262418  | 2.6225563  | 2.2178799  | C  | -3.6272132 | 0.8812153  | -2.8519621 |
| H | 1.0368738  | 3.3904363  | 1.9198859  | C  | -4.0512242 | 1.6018633  | -3.9966561 |
| C | 1.5072488  | -0.1987237 | -1.2529961 | C  | -3.1993042 | 2.4451233  | -4.6870591 |
| H | 2.5452358  | -0.4895757 | -1.4776921 | H  | -1.1860272 | 3.2600283  | -4.7458071 |
| H | 1.1291718  | 0.4472083  | -2.0622651 | H  | -0.3993142 | 2.0315543  | -2.7489441 |
| C | 5.1565628  | -0.0022777 | 0.1147889  | H  | -5.0864202 | 1.4758363  | -4.3302411 |
| C | 5.6261388  | 1.8530853  | 1.2283489  | H  | -3.5446422 | 2.9966703  | -5.5640831 |
| C | 6.5038348  | 0.3787503  | -0.0326111 | O  | -1.7685962 | 0.3240543  | -1.4104581 |
| H | 5.4533058  | 2.7109103  | 1.8778599  | C  | -4.5676872 | -0.0047277 | -2.2250151 |
| C | 7.3741588  | -0.4311377 | -0.8393921 | H  | -5.5299032 | -0.1525737 | -2.7427921 |
| C | 5.3327658  | -1.8270357 | -1.1896941 | N  | -4.3617872 | -0.6440517 | -1.1267551 |
| H | 7.2328928  | -2.1378237 | -1.9745371 | C  | -5.3034252 | -1.6180687 | -0.6086881 |
| N | 4.5979988  | 0.9703153  | 0.9242319  | H  | -6.3034222 | -1.5125587 | -1.0613421 |
| N | 6.7688388  | 1.5355933  | 0.6738519  | H  | -4.9031452 | -2.6193417 | -0.8385271 |
| N | 4.5577698  | -1.0758887 | -0.4245031 | C  | -5.3442032 | -1.4242297 | 0.9021329  |
| N | 6.6708698  | -1.5319257 | -1.3821681 | H  | -5.8532282 | -2.2621427 | 1.4061579  |
| N | 4.8241638  | -2.9117127 | -1.7926821 | H  | -5.8972502 | -0.4970657 | 1.1345409  |
| H | 3.7734798  | -3.0518017 | -1.8027391 | C  | -3.6521712 | -1.5672257 | 2.5782839  |
| H | 5.3946038  | -3.4268657 | -2.4510521 | H  | -4.4351842 | -1.9853207 | 3.2317639  |
| O | 8.5671638  | -0.2827227 | -1.0911061 | N  | -3.9687672 | -1.2750337 | 1.3620219  |
| O | 0.6584538  | -1.3227707 | -1.2017371 | C  | -2.3602542 | -1.3887177 | 3.1745999  |
| P | 1.1100688  | -2.8800317 | -0.9389561 | C  | -2.1981442 | -1.7746027 | 4.5300879  |
| O | -0.2685082 | -3.5967037 | -1.4209121 | C  | -1.2514462 | -0.8173947 | 2.4467729  |
| P | -0.2392722 | 3.7714133  | -0.1119371 | C  | -0.9955942 | -1.6248797 | 5.1954809  |
| O | 0.2413748  | 4.4703533  | 1.1676069  | H  | -3.0626172 | -2.1997537 | 5.0501629  |
| O | -1.1825112 | 2.5194053  | 0.2687329  | C  | -0.0174972 | -0.6849217 | 3.1677219  |
| O | -0.7649572 | 4.6276253  | -1.2282731 | C  | 0.0989498  | -1.0727477 | 4.4877309  |
| O | -1.7041472 | -4.3971587 | 0.6115599  | H  | -0.8903592 | -1.9260057 | 6.2398769  |
| O | 1.4217278  | -3.1398017 | 0.5145059  | H  | 0.8310538  | -0.2718697 | 2.6220169  |
| P | -1.8427022 | -3.7177117 | -0.7458401 | H  | 1.0604418  | -0.9501927 | 4.9966209  |
| O | -2.3383162 | -2.2363897 | -0.6575471 | O  | -1.2946762 | -0.4412387 | 1.2218969  |
| P | -2.6155722 | 2.4709623  | 1.1823399  | H  | 3.2902548  | 3.2516233  | 1.1309429  |

[Fe(ppGpp)<sub>2</sub>]<sup>9-</sup> (multiplicity = 6)

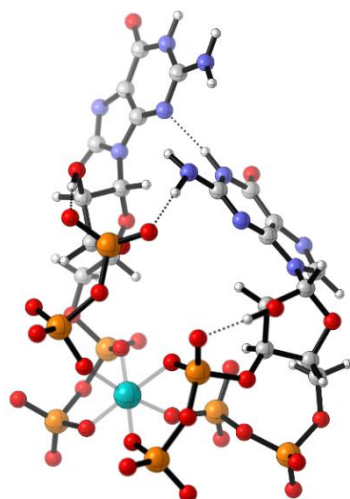

|                      |          |
|----------------------|----------|
| <b>E/hartree</b>     | -6734.19 |
| <b>E+zvp/hartree</b> | -6733.60 |
| <b>G/hartree</b>     | -6733.70 |

|   |            |            |            |   |            |            |            |
|---|------------|------------|------------|---|------------|------------|------------|
| C | 1.3825572  | 4.1704655  | 0.8791480  | O | 7.4305172  | -0.5405425 | 1.2240350  |
| O | 2.4833342  | 4.8052585  | 0.3033210  | O | 7.1774142  | 2.4413765  | -2.6262280 |
| C | 3.5692482  | 3.8689005  | 0.0431360  | O | 2.8711552  | 1.0316515  | -2.2250360 |
| C | 3.0905202  | 2.5263275  | 0.6318540  | C | -3.4631258 | -1.5133275 | -0.5547650 |
| C | 1.9077602  | 2.9150045  | 1.5568700  | O | -2.6255838 | -1.6394545 | -1.6729760 |
| H | 0.9205942  | 4.8451645  | 1.6171550  | C | -1.3941048 | -2.2708825 | -1.2442650 |
| H | 4.4673752  | 4.2136765  | 0.5773330  | C | -1.5721428 | -2.6347095 | 0.2374910  |
| H | 2.7593452  | 1.8705175  | -0.1883680 | C | -3.1086208 | -2.6937075 | 0.3548340  |
| H | 1.1442422  | 2.1256575  | 1.5961170  | H | -3.2602668 | -0.5907635 | 0.0049090  |
| O | 4.1211402  | 1.8866445  | 1.3622560  | H | -0.5701028 | -1.5498635 | -1.3318210 |
| O | 2.3337162  | 3.2709565  | 2.8481370  | H | -1.0492738 | -3.5645165 | 0.5089060  |
| H | 2.6296212  | 2.4052835  | 3.2394030  | H | -3.4449878 | -3.6197345 | -0.1589120 |
| C | 3.8144562  | 3.9031165  | -1.4776930 | O | -1.0637458 | -1.5503475 | 1.0162350  |
| H | 3.4981622  | 4.9061445  | -1.8098120 | O | -3.6868508 | -2.5719065 | 1.6108040  |
| H | 3.1790612  | 3.1390655  | -1.9544320 | H | -2.9655098 | -2.6900365 | 2.3083290  |
| C | -0.7934958 | 3.1523325  | 0.0226050  | C | -1.1366458 | -3.4407175 | -2.1905970 |
| C | 0.3045512  | 4.4081745  | -1.4282250 | H | -1.3021998 | -3.0714675 | -3.2171990 |
| C | -1.5047298 | 3.3003895  | -1.1774190 | H | -1.8556138 | -4.2529875 | -1.9944210 |
| H | 1.1117622  | 5.0293445  | -1.8079170 | C | -5.7797328 | -0.5818405 | -0.4637350 |
| C | -2.8041618 | 2.6912175  | -1.2861000 | C | -5.5249758 | -2.2970695 | -1.8295360 |
| C | -2.3325668 | 1.8680525  | 1.0185240  | C | -6.9925998 | -0.9511805 | -1.0526130 |
| H | -4.0318358 | 1.5109675  | -0.0843250 | H | -4.9979078 | -3.0783155 | -2.3749400 |
| N | 0.3720952  | 3.8652305  | -0.1549310 | C | -8.1794588 | -0.2154055 | -0.7081530 |
| N | -0.7952138 | 4.0854585  | -2.0666690 | C | -6.6360688 | 1.1088295  | 0.7445230  |
| N | -1.1606838 | 2.4690785  | 1.1252700  | H | -8.6762698 | 1.3606585  | 0.5250420  |
| N | -3.1234108 | 1.9944615  | -0.1016800 | N | -4.8455828 | -1.4475615 | -0.9686950 |
| N | -2.8124198 | 1.1152745  | 2.0399760  | N | -6.8044118 | -2.0228055 | -1.9060660 |
| H | -3.6082298 | 0.5224455  | 1.8128060  | N | -5.5516598 | 0.4246795  | 0.4107400  |
| H | -2.0641478 | 0.6417635  | 2.5987880  | N | -7.8719068 | 0.8112895  | 0.2319090  |
| O | -3.6011708 | 2.7153095  | -2.2207180 | N | -6.5309768 | 2.1415665  | 1.6019970  |
| O | 5.1490022  | 3.7614095  | -1.9218710 | H | -5.6428038 | 2.2938335  | 2.0644840  |
| P | 6.2243502  | 2.5679975  | -1.4603640 | H | -7.3372398 | 2.6574675  | 1.9285340  |
| O | 5.2656242  | 1.2621615  | -1.2879060 | O | -9.3312148 | -0.3579265 | -1.0905590 |
| P | 3.7712412  | 0.4520265  | 2.0874390  | O | 0.1594992  | -3.9835055 | -2.0564310 |
| O | 2.9906822  | 0.7690575  | 3.3610450  | P | 1.4610382  | -2.9813385 | -2.3610530 |
| O | 5.2388292  | -0.0307105 | 2.4802260  | O | 2.5578362  | -4.0625185 | -2.8017190 |
| O | 3.0781002  | -0.4584815 | 1.0744440  | P | -0.7214288 | -1.7220855 | 2.6333540  |
| O | 4.2728482  | -1.0398175 | -1.5002690 | O | -0.7595898 | -0.3096005 | 3.1920810  |
| O | 6.7724532  | 2.9321235  | -0.0978860 | O | 0.7876402  | -2.2355565 | 2.6912050  |
| P | 4.2357842  | 0.3340735  | -2.2695800 | O | -1.6954358 | -2.7539155 | 3.2055210  |
| O | 4.8841932  | 0.2081885  | -3.6403810 | O | 4.3126512  | -3.8329995 | -0.9231790 |
| P | 6.3084622  | -1.2791835 | 1.9300710  | O | 1.8246202  | -2.3397465 | -1.0134120 |
| O | 6.6329722  | -2.0433065 | 3.2015710  | P | 3.7116342  | -4.9505605 | -1.8565120 |
| O | 5.4134622  | -2.1144845 | 0.9447480  | O | 4.7058532  | -5.4154465 | -2.9034240 |

|   |           |            |           |    |           |            |            |
|---|-----------|------------|-----------|----|-----------|------------|------------|
| P | 1.5889512 | -3.7363795 | 2.3649580 | O  | 1.0967272 | -2.0837145 | -3.5151900 |
| O | 2.8135352 | -3.2375115 | 1.5258420 | O  | 2.9132662 | -5.9987745 | -1.1001420 |
| O | 2.0159452 | -4.2305815 | 3.7375140 | Fe | 3.6600532 | -2.1962355 | 0.0112490  |
| O | 0.5942192 | -4.5965515 | 1.5913840 |    |           |            |            |

[Fe(ppGpp)<sub>2</sub>]<sup>9-</sup> (multiplicity = 2)

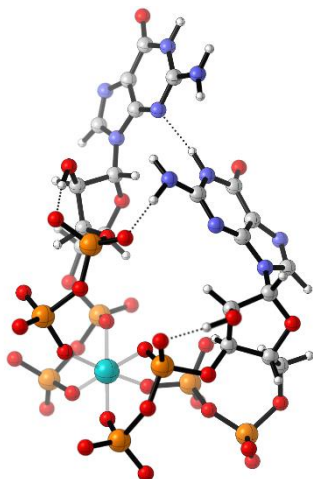

|                      |          |
|----------------------|----------|
| <b>E/hartree</b>     | -6734.13 |
| <b>E+zvp/hartree</b> | -6733.54 |
| <b>G/hartree</b>     | -6733.64 |

|   |            |            |            |   |            |            |            |
|---|------------|------------|------------|---|------------|------------|------------|
| C | 1.3945177  | 4.1821083  | 0.8780193  | O | 2.8179717  | 1.0420333  | -2.1764627 |
| O | 2.4963557  | 4.8189143  | 0.3062063  | C | -3.4891543 | -1.5600447 | -0.4743637 |
| C | 3.5851867  | 3.8839183  | 0.0526913  | O | -2.6666743 | -1.6503937 | -1.6076107 |
| C | 3.1118917  | 2.5451783  | 0.6515193  | C | -1.4210623 | -2.2742087 | -1.2159717 |
| C | 1.9197647  | 2.9323233  | 1.5651723  | C | -1.5581123 | -2.6468557 | 0.2671153  |
| H | 0.9241407  | 4.8595713  | 1.6081003  | C | -3.0909853 | -2.7394987 | 0.4187273  |
| H | 4.4826777  | 4.2398193  | 0.5805953  | H | -3.3001253 | -0.6409857 | 0.0953633  |
| H | 2.7874967  | 1.8816103  | -0.1647527 | H | -0.6073663 | -1.5446227 | -1.3201307 |
| H | 1.1591617  | 2.1402833  | 1.5993583  | H | -1.0133683 | -3.5676487 | 0.5248423  |
| O | 4.1383847  | 1.9124263  | 1.3957223  | H | -3.4201473 | -3.6712167 | -0.0890137 |
| O | 2.3319117  | 3.2908303  | 2.8604463  | O | -1.0589213 | -1.5529917 | 1.0356033  |
| H | 2.6266097  | 2.4258153  | 3.2527413  | O | -3.6393223 | -2.6337437 | 1.6897623  |
| C | 3.8180227  | 3.9038333  | -1.4697057 | H | -2.8977733 | -2.7380857 | 2.3675163  |
| H | 3.5282077  | 4.9144333  | -1.8035727 | C | -1.1789453 | -3.4362967 | -2.1751697 |
| H | 3.1525487  | 3.1578683  | -1.9341937 | H | -1.3635093 | -3.0603127 | -3.1960857 |
| C | -0.7698513 | 3.1447913  | 0.0175593  | H | -1.8921963 | -4.2519147 | -1.9721577 |
| C | 0.3272397  | 4.3954813  | -1.4383547 | C | -5.7979663 | -0.6056957 | -0.4269517 |
| C | -1.4771553 | 3.2790783  | -1.1861457 | C | -5.5594353 | -2.3900917 | -1.7047097 |
| H | 1.1320297  | 5.0187933  | -1.8195737 | C | -7.0093443 | -0.9781077 | -1.0168817 |
| C | -2.7730923 | 2.6618323  | -1.2943337 | H | -5.0418583 | -3.2074207 | -2.2047687 |
| C | -2.3052523 | 1.8594803  | 1.0183703  | C | -8.1831643 | -0.1965137 | -0.7349947 |
| H | -3.9997683 | 1.4843253  | -0.0899017 | C | -6.6331903 | 1.1633013  | 0.6778493  |
| N | 0.3920437  | 3.8636633  | -0.1602137 | H | -8.6613963 | 1.4549343  | 0.4024603  |
| N | -0.7681363 | 4.0612073  | -2.0787017 | N | -4.8758313 | -1.5154447 | -0.8726827 |
| N | -1.1371923 | 2.4677373  | 1.1237843  | N | -6.8313533 | -2.0940677 | -1.8141157 |
| N | -3.0930103 | 1.9713383  | -0.1056657 | N | -5.5595323 | 0.4379683  | 0.3998823  |
| N | -2.7817353 | 1.1132483  | 2.0462943  | N | -7.8663533 | 0.8701063  | 0.1562103  |
| H | -3.5856913 | 0.5279203  | 1.8312163  | N | -6.5194303 | 2.2352253  | 1.4844223  |
| H | -2.0329243 | 0.6381583  | 2.6029783  | H | -5.6371223 | 2.3902133  | 1.9568143  |
| O | -3.5670683 | 2.6749993  | -2.2316167 | H | -7.3196063 | 2.7835533  | 1.7706853  |
| O | 5.1405917  | 3.7179613  | -1.9302907 | O | -9.3305903 | -0.3292187 | -1.1335447 |
| P | 6.2062827  | 2.5113273  | -1.4831527 | O | 0.1204137  | -3.9757337 | -2.0666127 |
| O | 5.2415387  | 1.2083533  | -1.3017607 | P | 1.4113937  | -2.9603687 | -2.3741947 |
| P | 3.7626577  | 0.4664023  | 2.0906793  | O | 2.5107777  | -4.0250277 | -2.8461477 |
| O | 2.9861167  | 0.7798503  | 3.3667193  | P | -0.6622463 | -1.7237507 | 2.6407783  |
| O | 5.2181467  | -0.0561227 | 2.4805013  | O | -0.7209213 | -0.3125407 | 3.2022613  |
| O | 3.0562557  | -0.4048467 | 1.0527413  | O | 0.8575067  | -2.2040947 | 2.6497703  |
| O | 4.2083167  | -1.0932207 | -1.5950107 | O | -1.5985103 | -2.7789557 | 3.2333223  |
| O | 6.7752447  | 2.8596383  | -0.1259047 | O | 4.2875837  | -3.7774467 | -0.9729907 |
| P | 4.1704487  | 0.3286103  | -2.2817107 | O | 1.7732517  | -2.3371197 | -1.0144837 |
| O | 4.7829247  | 0.2393633  | -3.6718537 | P | 3.6637967  | -4.8994487 | -1.8930557 |
| P | 6.2453377  | -1.3128287 | 1.8865143  | O | 4.6673377  | -5.3714157 | -2.9287767 |
| O | 6.4512467  | -2.2068457 | 3.0963573  | P | 1.7030677  | -3.6941957 | 2.3802833  |
| O | 5.4033197  | -2.0152987 | 0.7541593  | O | 2.9532397  | -3.2152677 | 1.5574553  |
| O | 7.4427477  | -0.5797477 | 1.3111613  | O | 2.1220097  | -4.1343087 | 3.7745583  |
| O | 7.1423597  | 2.3828943  | -2.6621117 | O | 0.7299547  | -4.5995117 | 1.6311853  |

|   |           |            |            |
|---|-----------|------------|------------|
| O | 1.0235157 | -2.0492017 | -3.5091517 |
| O | 2.8624947 | -5.9465157 | -1.1384147 |

|    |           |            |            |
|----|-----------|------------|------------|
| Fe | 3.6503487 | -2.1635277 | -0.0385067 |
|----|-----------|------------|------------|

[Fe(pppGpp)<sub>2</sub>]<sup>11-</sup> (multiplicity = 6)

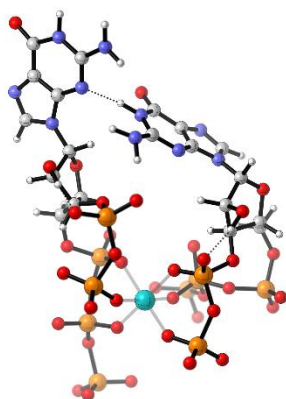

|                      |          |
|----------------------|----------|
| <b>E/hartree</b>     | -7868.17 |
| <b>E+zvp/hartree</b> | -7867.55 |
| <b>G/hartree</b>     | -7867.66 |

|   |            |            |            |    |            |            |            |
|---|------------|------------|------------|----|------------|------------|------------|
| C | -0.0550396 | 4.5491350  | -0.4975439 | O  | 2.6812314  | -1.9450650 | 1.5083271  |
| O | -1.1236736 | 5.2462050  | 0.0756371  | C  | 1.4271134  | -2.2739390 | 0.8674501  |
| C | -2.3910206 | 4.5712720  | -0.1324609 | C  | 1.7321934  | -2.5377510 | -0.6150199 |
| C | -2.0217546 | 3.2385360  | -0.7999119 | C  | 3.2361734  | -2.8770970 | -0.5621979 |
| C | -0.6423346 | 3.5114980  | -1.4471669 | H  | 3.7257644  | -0.8937250 | 0.0523511  |
| H | 0.5877154  | 5.2504080  | -1.0541679 | H  | 0.7563714  | -1.4061780 | 0.9363901  |
| H | -3.0057456 | 5.1673740  | -0.8257379 | H  | 1.0935904  | -3.3274550 | -1.0402139 |
| H | -1.9462436 | 2.4537530  | -0.0311179 | H  | 3.3264354  | -3.8978640 | -0.1326959 |
| H | -0.0107976 | 2.6121050  | -1.4867399 | O  | 1.5179084  | -1.3155020 | -1.3259679 |
| O | -2.9944536 | 2.8865590  | -1.7564429 | O  | 3.9938424  | -2.7447610 | -1.7176319 |
| O | -0.7671866 | 4.0971150  | -2.7187879 | H  | 3.3680414  | -2.6530310 | -2.5051189 |
| H | -1.1319306 | 3.3620390  | -3.2784549 | C  | 0.8291064  | -3.4507310 | 1.6320561  |
| C | -3.0789426 | 4.4824730  | 1.2384781  | H  | 0.8882034  | -3.2162730 | 2.7078761  |
| H | -2.7159406 | 5.3458120  | 1.8200901  | H  | 1.4166854  | -4.3625290 | 1.4402191  |
| H | -2.7673266 | 3.5518590  | 1.7402941  | C  | 6.1036444  | -1.4033620 | 0.8622471  |
| C | 1.8347734  | 3.0947120  | 0.3848571  | C  | 5.3517774  | -3.1926320 | 1.9154121  |
| C | 0.7354484  | 4.2500450  | 1.9161901  | C  | 7.1275284  | -2.0611390 | 1.5504651  |
| C | 2.4072964  | 2.9430650  | 1.6557581  | H  | 4.6217534  | -3.9209710 | 2.2652601  |
| H | -0.0304966 | 4.9109680  | 2.3157251  | C  | 8.4593624  | -1.5230370 | 1.4868851  |
| C | 3.5920654  | 2.1338340  | 1.7799441  | C  | 7.4125104  | 0.2295770  | 0.0447231  |
| C | 3.2827684  | 1.7497020  | -0.6632119 | H  | 9.4016524  | 0.0734850  | 0.5864711  |
| H | 4.7798844  | 0.9740690  | 0.5210281  | N  | 4.9704184  | -2.1350210 | 1.1026331  |
| N | 0.7585914  | 3.9343000  | 0.5667721  | N  | 6.6298514  | -3.1730510 | 2.2041021  |
| N | 1.6989264  | 3.6715370  | 2.5937831  | N  | 6.1896584  | -0.2748180 | 0.1204451  |
| N | 2.2336744  | 2.5438830  | -0.7780279 | N  | 8.4819094  | -0.3519510 | 0.6749991  |
| N | 3.9495924  | 1.5840550  | 0.5293401  | N  | 7.6237264  | 1.3623000  | -0.6536799 |
| N | 3.7557764  | 1.0828020  | -1.7460919 | H  | 6.8659564  | 1.7210520  | -1.2218469 |
| H | 4.4249494  | 0.3410030  | -1.5544259 | H  | 8.5541354  | 1.7222280  | -0.8223579 |
| H | 3.0225244  | 0.8333570  | -2.4466679 | O  | 9.4934524  | -1.9214570 | 2.0016201  |
| O | 4.2720524  | 1.8925670  | 2.7739121  | O  | -0.5044796 | -3.7262610 | 1.2530981  |
| O | -4.4901596 | 4.5834680  | 1.2446431  | P  | -1.6679076 | -2.5885550 | 1.5837231  |
| P | -5.5872916 | 3.6674160  | 0.3864011  | O  | -2.9537956 | -3.5604180 | 1.7508871  |
| O | -4.8587806 | 2.1896530  | 0.3291471  | P  | 1.3717114  | -1.2736620 | -2.9794899 |
| P | -2.7800976 | 1.5132420  | -2.6236089 | O  | 1.6672174  | 0.1651620  | -3.3589639 |
| O | -1.7605926 | 1.8302380  | -3.7096379 | O  | -0.1755686 | -1.5560690 | -3.2801029 |
| O | -4.2293426 | 1.3469980  | -3.2603749 | O  | 2.2554114  | -2.3802390 | -3.5556089 |
| O | -2.4236856 | 0.3879360  | -1.6432059 | O  | -4.3380246 | -2.9983990 | -0.3489009 |
| O | -4.3510256 | -0.2732180 | 0.4877941  | O  | -1.8375596 | -1.7272550 | 0.3282121  |
| O | -5.6589486 | 4.1771770  | -1.0311789 | P  | -3.9478646 | -4.2028720 | 0.5403231  |
| P | -4.3167136 | 1.0099660  | 1.3486441  | O  | -5.1523076 | -4.6268620 | 1.4664981  |
| O | -5.4968676 | 0.9530230  | 2.4073561  | P  | -1.1813056 | -2.9524480 | -3.1667599 |
| P | -5.4595496 | 0.1224090  | -3.2419219 | O  | -2.4266186 | -2.3720810 | -2.4031589 |
| O | -5.4815556 | -0.3897660 | -4.6684299 | O  | -1.5196026 | -3.2874010 | -4.6074999 |
| O | -4.8889946 | -0.9555310 | -2.2405509 | O  | -0.4082076 | -3.9821980 | -2.3527079 |
| O | -6.6757526 | 0.8370900  | -2.6908819 | O  | -1.3229026 | -1.9178340 | 2.8810741  |
| O | -6.8269966 | 3.6460070  | 1.2430471  | O  | -3.2127626 | -5.3323680 | -0.1297489 |
| O | -2.9717886 | 1.4150400  | 1.9169401  | Fe | -3.4058586 | -1.3447560 | -1.0303429 |
| C | 3.6742754  | -1.8853750 | 0.5185841  | P  | -5.5458886 | 0.2872000  | 4.0753621  |

|   |            |            |            |
|---|------------|------------|------------|
| P | -6.8701176 | -4.9132700 | 0.9100401  |
| O | -7.5119306 | -3.5374180 | 1.1013021  |
| O | -7.2841446 | -5.9906820 | 1.9115021  |
| O | -6.6746736 | -5.3759380 | -0.5372149 |

|   |            |            |           |
|---|------------|------------|-----------|
| O | -7.0608426 | 0.1964330  | 4.2769781 |
| O | -4.8099156 | -1.0504760 | 3.9351461 |
| O | -4.8313416 | 1.3575550  | 4.9055371 |

[Fe(pppGpp)<sub>2</sub>]<sup>11-</sup> (multiplicity = 2)

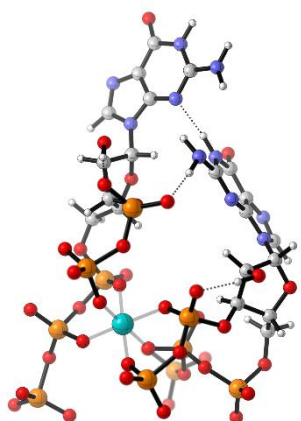

|                      |          |
|----------------------|----------|
| <b>E/hartree</b>     | -7868.11 |
| <b>E+zvp/hartree</b> | -7867.49 |
| <b>G/hartree</b>     | -7867.60 |

|   |            |            |            |    |            |            |            |
|---|------------|------------|------------|----|------------|------------|------------|
| C | 0.0994069  | 4.4995654  | 0.8050107  | O  | -2.6754301 | -1.8251646 | -1.6505413 |
| O | 1.1812959  | 5.2306164  | 0.3034957  | C  | -1.4157891 | -2.1953116 | -1.0411823 |
| C | 2.4381019  | 4.5168274  | 0.4475567  | C  | -1.7169081 | -2.5627806 | 0.4189807  |
| C | 2.0459369  | 3.1438434  | 1.0115167  | C  | -3.2101691 | -2.9390266 | 0.3340967  |
| C | 0.6675419  | 3.3854604  | 1.6737597  | H  | -3.7190451 | -0.9161396 | -0.1019323 |
| H | -0.5444811 | 5.1620044  | 1.4059767  | H  | -0.7476391 | -1.3229776 | -1.0524993 |
| H | 3.0706749  | 5.0474014  | 1.1764877  | H  | -1.0588941 | -3.3574326 | 0.8024707  |
| H | 1.9671019  | 2.4217964  | 0.1848537  | H  | -3.2768961 | -3.9199326 | -0.1830873 |
| H | 0.0289779  | 2.4913054  | 1.6468217  | O  | -1.5560721 | -1.3790316 | 1.2040887  |
| O | 3.0042599  | 2.6988244  | 1.9457467  | O  | -3.9689161 | -2.9276076 | 1.4959137  |
| O | 0.7935579  | 3.8659144  | 2.9888237  | H  | -3.3439391 | -2.8758236 | 2.2871107  |
| H | 1.1203989  | 3.0706714  | 3.4835387  | C  | -0.8216001 | -3.3140316 | -1.8925563 |
| C | 3.1034849  | 4.5197554  | -0.9368883 | H  | -0.8538591 | -2.9856776 | -2.9448223 |
| H | 2.7808479  | 5.4526164  | -1.4286093 | H  | -1.4312471 | -4.2259976 | -1.7937053 |
| H | 2.7319169  | 3.6559614  | -1.5105933 | C  | -6.0890801 | -1.3439476 | -0.9264613 |
| C | -1.7835661 | 3.1212284  | -0.2109643 | C  | -5.3790381 | -3.0729896 | -2.1017313 |
| C | -0.6676621 | 4.3962454  | -1.6319323 | C  | -7.1365071 | -1.9548296 | -1.6215283 |
| C | -2.3398681 | 3.0717774  | -1.4974503 | H  | -4.6653931 | -3.7857276 | -2.5124013 |
| H | 0.1019539  | 5.0875344  | -1.9678903 | C  | -8.4635631 | -1.4192306 | -1.4798083 |
| C | -3.5219171 | 2.2757514  | -1.7034823 | C  | -7.3622261 | 0.2417484  | 0.0293097  |
| C | -3.2590301 | 1.7136334  | 0.7111977  | H  | -9.3699891 | 0.1176894  | -0.4477213 |
| H | -4.7334591 | 1.0325774  | -0.5512903 | N  | -4.9674041 | -2.0658716 | -1.2406393 |
| N | -0.7058191 | 3.9732834  | -0.3127693 | N  | -6.6644911 | -3.0294726 | -2.3527163 |
| N | -1.6218031 | 3.8733494  | -2.3654913 | N  | -6.1447821 | -0.2604626 | -0.1181873 |
| N | -2.1985321 | 2.4794214  | 0.8994147  | N  | -8.4543501 | -0.2988716 | -0.5982673 |
| N | -3.9004551 | 1.6338994  | -0.5048573 | N  | -7.5441761 | 1.3271554  | 0.8052077  |
| N | -3.7760511 | 0.9922044  | 1.7364127  | H  | -6.7613711 | 1.6626714  | 1.3533567  |
| H | -4.4613551 | 0.2862944  | 1.4753457  | H  | -8.4629351 | 1.7008024  | 1.0041467  |
| H | -3.0686741 | 0.6746924  | 2.4387507  | O  | -9.5165881 | -1.7849916 | -1.9799633 |
| O | -4.1840421 | 2.1118274  | -2.7247763 | O  | 0.4977819  | -3.6558896 | -1.5145963 |
| O | 4.5176349  | 4.5386064  | -0.9695813 | P  | 1.6882879  | -2.5108726 | -1.6685483 |
| P | 5.5920799  | 3.5408834  | -0.1758633 | O  | 2.9692549  | -3.4752286 | -1.8842283 |
| O | 4.8562989  | 2.0666314  | -0.2386773 | P  | -1.4111261 | -1.4488296 | 2.8581627  |
| P | 2.7564609  | 1.2548564  | 2.6727697  | O  | -1.7961771 | -0.0621046 | 3.3412447  |
| O | 1.6650349  | 1.4588364  | 3.7115127  | O  | 0.1522269  | -1.6552466 | 3.1263027  |
| O | 4.1660149  | 1.0368194  | 3.3768697  | O  | -2.2264601 | -2.6457066 | 3.3477957  |
| O | 2.4821059  | 0.2283654  | 1.5586407  | O  | 4.2624329  | -3.0579396 | 0.3180797  |
| O | 4.3297809  | -0.3614546 | -0.7931053 | O  | 1.7960329  | -1.8089986 | -0.3018983 |
| O | 5.6628509  | 3.9461944  | 1.2757667  | P  | 3.9279709  | -4.1909106 | -0.6924373 |
| P | 4.2431499  | 1.0513634  | -1.4018283 | O  | 5.1782649  | -4.5168926 | -1.5933563 |
| O | 5.3470019  | 1.2044304  | -2.5386963 | P  | 1.1843119  | -3.0352536 | 3.0768317  |
| P | 5.3986689  | -0.1700646 | 3.2225457  | O  | 2.5125419  | -2.4054326 | 2.5029197  |
| O | 5.3364539  | -0.9364446 | 4.5288087  | O  | 1.3794349  | -3.4186416 | 4.5330897  |
| O | 4.9279759  | -1.0333796 | 1.9779827  | O  | 0.5107009  | -4.0460796 | 2.1604267  |
| O | 6.6450189  | 0.6225034  | 2.8877847  | O  | 1.4076239  | -1.6930676 | -2.8929613 |
| O | 6.8406859  | 3.5757844  | -1.0194223 | O  | 3.1953929  | -5.3873436 | -0.1496863 |
| O | 2.8691019  | 1.5522964  | -1.8128983 | Fe | 3.3625809  | -1.4550906 | 0.9784157  |
| C | -3.6652001 | -1.8621546 | -0.6544093 | P  | 5.3496379  | 0.7786284  | -4.2768793 |

P 6.8878139 -4.7895266 -1.0104563  
 O 7.4909169 -3.3884256 -1.1293783  
 O 7.3546579 -5.8100236 -2.0471443  
 O 6.6700059 -5.3187636 0.4104067

O 6.8566969 0.6282084 -4.5094243  
 O 4.5337619 -0.5186826 -4.3339073  
 O 4.7038679 2.0010154 -4.9396193

### salene<sup>2-</sup>

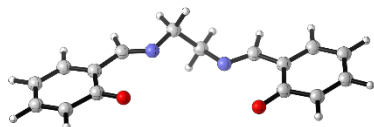

C -6.1936237 -1.4862705 -0.2121100  
 C -5.0011627 -2.1359505 0.0437490  
 C -3.7317057 -1.4487285 0.2270240  
 C -3.8161297 0.0135345 0.1137900  
 C -5.0622297 0.6305715 -0.1455960  
 C -6.2459817 -0.0773575 -0.3117480  
 H -7.1111367 -2.0720365 -0.3389040  
 H -4.9649387 -3.2277495 0.1213790  
 H -5.0798847 1.7247125 -0.2186360  
 H -7.1878797 0.4383185 -0.5127030  
 O -2.6757857 -2.0898605 0.4628260  
 C -2.6803387 0.9127415 0.2563580  
 H -2.9728397 1.9862425 0.1612620  
 N -1.4448807 0.6341335 0.4702410  
 C -0.5339047 1.7509085 0.5545500  
 H -1.0643757 2.7294645 0.5080080  
 H -0.0011767 1.7173465 1.5243980  
 C 0.5338383 1.7508745 -0.5542920

H 1.0643123 2.7294335 -0.5078200  
 H 0.0011013 1.7172445 -1.5241320  
 C 2.6802883 0.9127055 -0.2561880  
 H 2.9728243 1.9862215 -0.1613610  
 N 1.4448043 0.6340945 -0.4699140  
 C 3.8161083 0.0135145 -0.1137120  
 C 5.0622463 0.6305965 0.1453820  
 C 3.7316863 -1.4487635 -0.2267730  
 C 6.2460383 -0.0772965 0.3114020  
 H 5.0798973 1.7247465 0.2182970  
 C 5.0011883 -2.1359435 -0.0436650  
 C 6.1936863 -1.4862185 0.2119010  
 H 7.1879723 0.4384155 0.5120970  
 H 4.9649753 -3.2277505 -0.1211930  
 H 7.1112333 -2.0719575 0.3385800  
 O 2.6757753 -2.0899375 -0.4624980

|                      |         |
|----------------------|---------|
| <b>E/hartree</b>     | -877.72 |
| <b>E+zvp/hartree</b> | -877.46 |
| <b>G/hartree</b>     | -877.50 |

### water

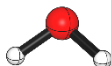

O 0.0000000 0.0000000 0.4036067  
 H 0.0000000 0.7551370 -0.2018033

H 0.0000000 -0.7551370 -0.2018033

|                      |        |
|----------------------|--------|
| <b>E/hartree</b>     | -76.37 |
| <b>E+zvp/hartree</b> | -76.34 |
| <b>G/hartree</b>     | -76.36 |

### ppGpp<sup>6-</sup>

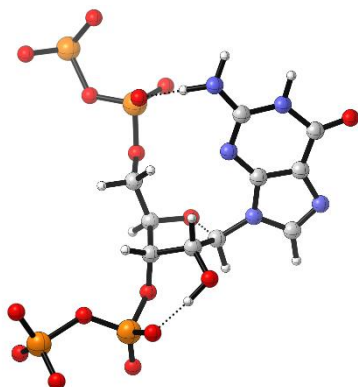

C 0.8255824 1.6777101 -1.0206994  
 O 0.2641294 0.5222131 -1.5960694

C 0.8646014 -0.6581649 -1.0201914  
 C 2.0673424 -0.1528769 -0.2178064

|                      |          |
|----------------------|----------|
| <b>E/hartree</b>     | -3305.14 |
| <b>E+zvp/hartree</b> | -3304.85 |
| <b>G/hartree</b>     | -3304.92 |

C 1.5563534 1.2226171 0.2545686  
H 1.5735724 2.1406911 -1.6891354  
H 1.2177764 -1.2892089 -1.8513464  
H 2.3172134 -0.8255219 0.6186686  
H 0.7854944 1.0437261 1.0278946  
O 3.1729844 -0.0085199 -1.0897424  
O 2.4944624 2.1501471 0.6899246  
H 3.4029714 1.7022001 0.7265076  
C -0.1342166 -1.4343039 -0.1742314  
H -0.4604846 -0.8267849 0.6810886  
H 0.3877244 -2.3304339 0.2217136  
C -1.3666686 2.5599931 -0.0843784  
C -0.1820356 3.9731691 -1.3098194  
C -1.9931726 3.8117571 -0.1956974  
H 0.6489014 4.3174791 -1.9262084  
C -3.2652116 4.0022671 0.4439826  
C -2.9856576 1.6121641 1.1442906  
H -4.5792246 2.8793291 1.5516416  
N -0.1989086 2.6802321 -0.8088844  
N -1.2296906 4.6758471 -0.9618094  
N -1.7990596 1.4701751 0.5682206  
N -3.6742096 2.8125341 1.0931416

N -3.5353206 0.5873941 1.8115576  
H -3.1564516 -0.3913689 1.6025566  
H -4.5002326 0.6716091 2.1089966  
O -3.9827866 4.9978701 0.4814496  
O -1.2411626 -1.7997719 -0.9612704  
P -2.7045926 -2.2189949 -0.2507404  
O -2.6074046 -3.8100829 -0.4017514  
P 4.7306664 -0.0951899 -0.4456684  
O 5.6452684 0.1582931 -1.6161364  
O 4.7015854 -1.6010669 0.0861066  
O 4.7294554 0.8952411 0.7312556  
O -4.9941456 -4.2719179 0.5854336  
O -3.7695486 -1.5746199 -1.1056004  
P -3.9466756 -4.9971859 -0.2715614  
O -4.3332446 -5.2302029 -1.7371844  
P 6.0906824 -2.6276909 0.5951386  
O 7.1535374 -1.5974599 0.9989416  
O 5.4486404 -3.4115839 1.7424676  
O 6.3910754 -3.4296959 -0.6751244  
O -2.6072946 -1.8208249 1.2319216  
O -3.2226206 -6.1611879 0.4135886

pppGpp<sup>7-</sup>

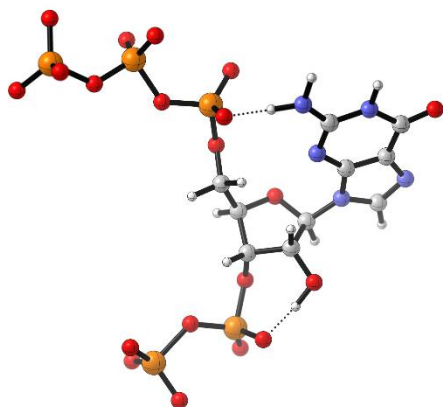

|                      |          |
|----------------------|----------|
| <b>E/hartree</b>     | -3872.15 |
| <b>E+zvp/hartree</b> | -3871.84 |
| <b>G/hartree</b>     | -3871.92 |

C 2.3834536 1.0723850 -0.9346765  
O 1.2497956 0.5862720 -1.6142355  
C 0.8905706 -0.7151680 -1.1047085  
C 2.0659076 -1.1489970 -0.2230395  
C 2.5421346 0.2101890 0.3289565  
H 3.2994226 0.9508650 -1.5401825  
H 0.8036516 -1.3967580 -1.9656595  
H 1.7475956 -1.8416050 0.5729195  
H 1.7878316 0.5559240 1.0615945  
O 3.0627096 -1.7404230 -1.0333455  
O 3.8256656 0.2800630 0.8549275  
H 4.1828676 -0.6645720 0.9468735  
C -0.4255834 -0.6738620 -0.3424225  
H -0.3300764 -0.0400300 0.5496175  
H -0.6553734 -1.7059120 -0.0099805  
C 1.2540376 3.1517220 0.0008285  
C 3.1639836 3.4656280 -1.0737395  
C 1.6299406 4.5042170 -0.0183005  
H 4.0558196 3.1941680 -1.6393185  
C 0.7709996 5.4662380 0.6148445  
C -0.6611564 3.4750010 1.1204545  
H -1.0265334 5.4584800 1.6094795  
N 2.2539376 2.4939320 -0.6851975  
N 2.8274406 4.6711090 -0.6919065

N 0.1594446 2.6028870 0.5518415  
N -0.3696304 4.8269170 1.1583635  
N -1.7970924 3.0518120 1.6953035  
H -2.1382404 2.0815240 1.4398185  
H -2.4791964 3.7399830 1.9899815  
O 0.9021856 6.6817030 0.7237725  
O -1.4488874 -0.1771350 -1.1775905  
P -2.8693084 0.3976440 -0.5287055  
O -3.7776584 -0.9390420 -0.7304705  
P 4.1264096 -2.8417490 -0.3190925  
O 5.1488996 -3.1368930 -1.3857695  
O 3.0991886 -4.0255920 -0.0155405  
O 4.5802176 -2.1615790 0.9846115  
O -5.9889744 0.0674590 0.1986175  
O -3.3125714 1.5358740 -1.4085855  
P -5.4901434 -0.9945430 -0.7617215  
O -5.8877924 -0.9253460 -2.2211015  
P 3.4723136 -5.7294480 0.4447295  
O 4.8635196 -5.6188490 1.0820685  
O 2.3154806 -6.0126940 1.4062395  
O 3.4162576 -6.4562630 -0.9025995  
O -2.6448444 0.6224860 0.9676185  
O -5.5970874 -2.4884220 -0.1737365  
P -7.0441434 -3.3038830 0.4606065

|   |            |            |            |
|---|------------|------------|------------|
| O | -6.7830034 | -4.7458020 | 0.0051735  |
| O | -6.9413294 | -3.0659530 | 1.9734565  |
| O | -8.2130574 | -2.5939600 | -0.2410715 |

## 6. NMR Spektre

Compound **8** (ppAp),  $^1\text{H-NMR}$  ( $\text{D}_2\text{O}$ , 400 MHz)

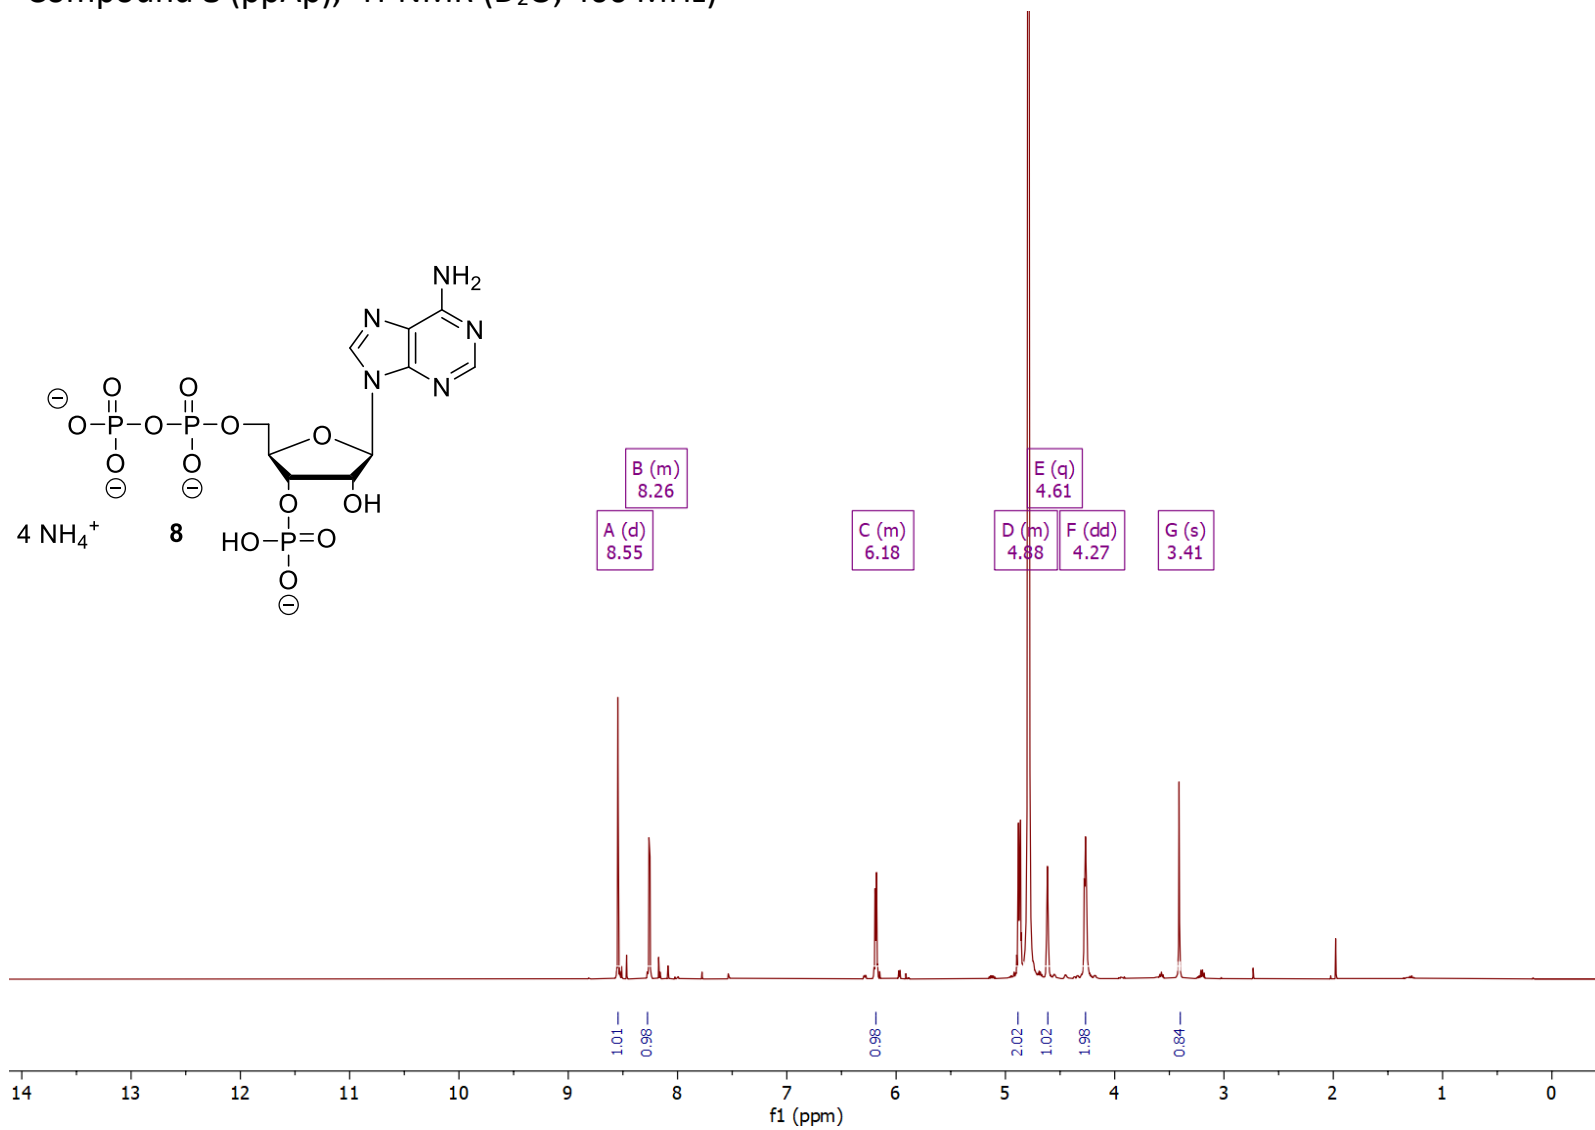

Compound **8** (ppAp),  $^{31}\text{P}\{^1\text{H}\}$ -NMR ( $\text{D}_2\text{O}$ , 162 MHz)

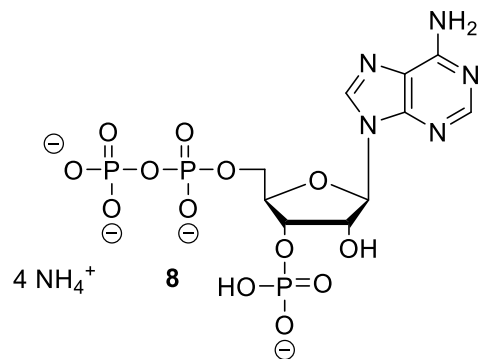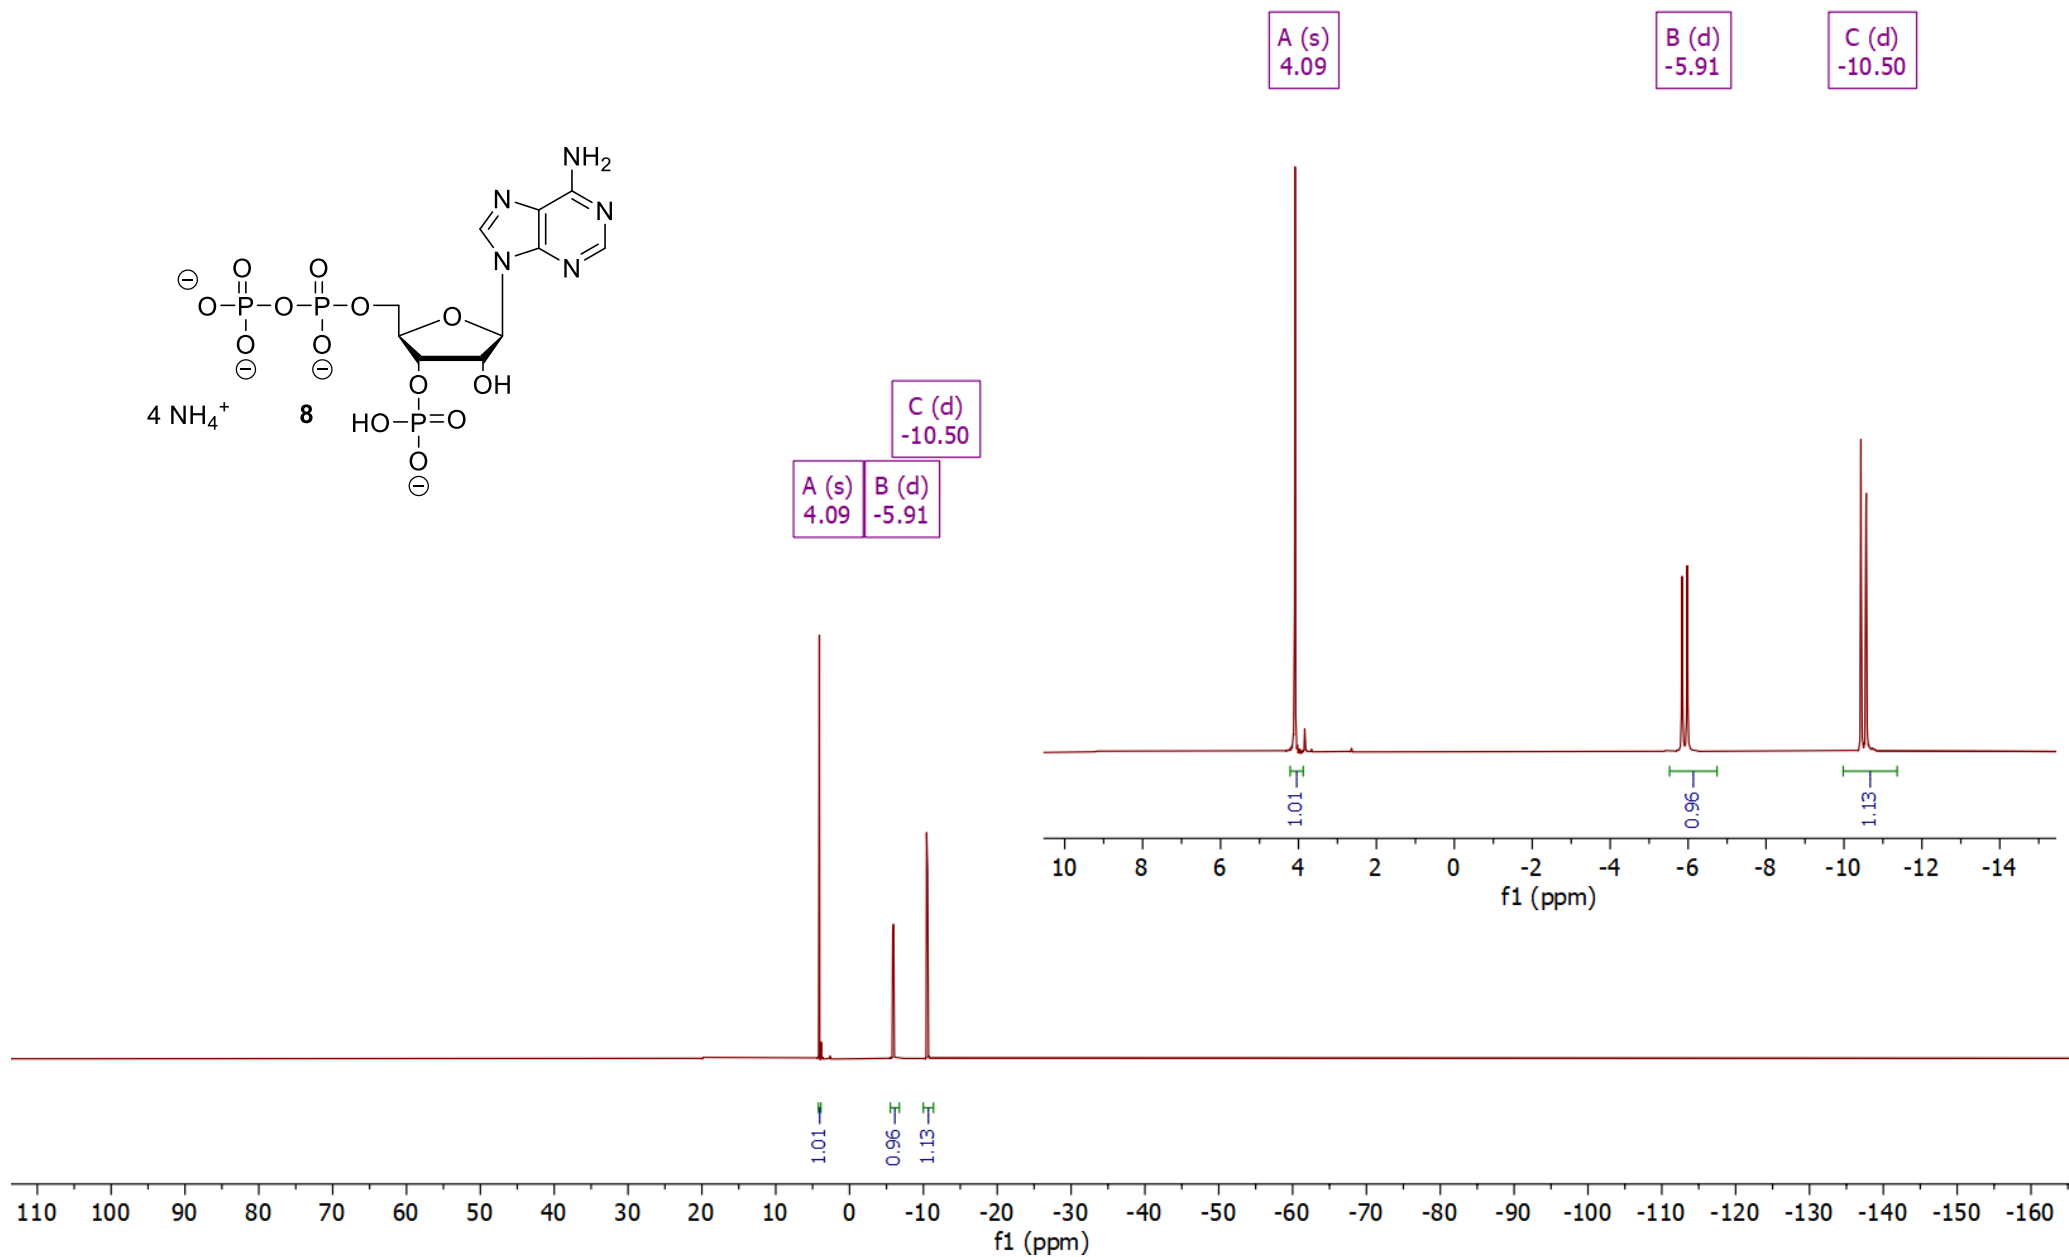

Compound **8** (ppAp),  $^{13}\text{C}$ [ $^1\text{H}$ ]-NMR ( $\text{D}_2\text{O}$ , 101 MHz)

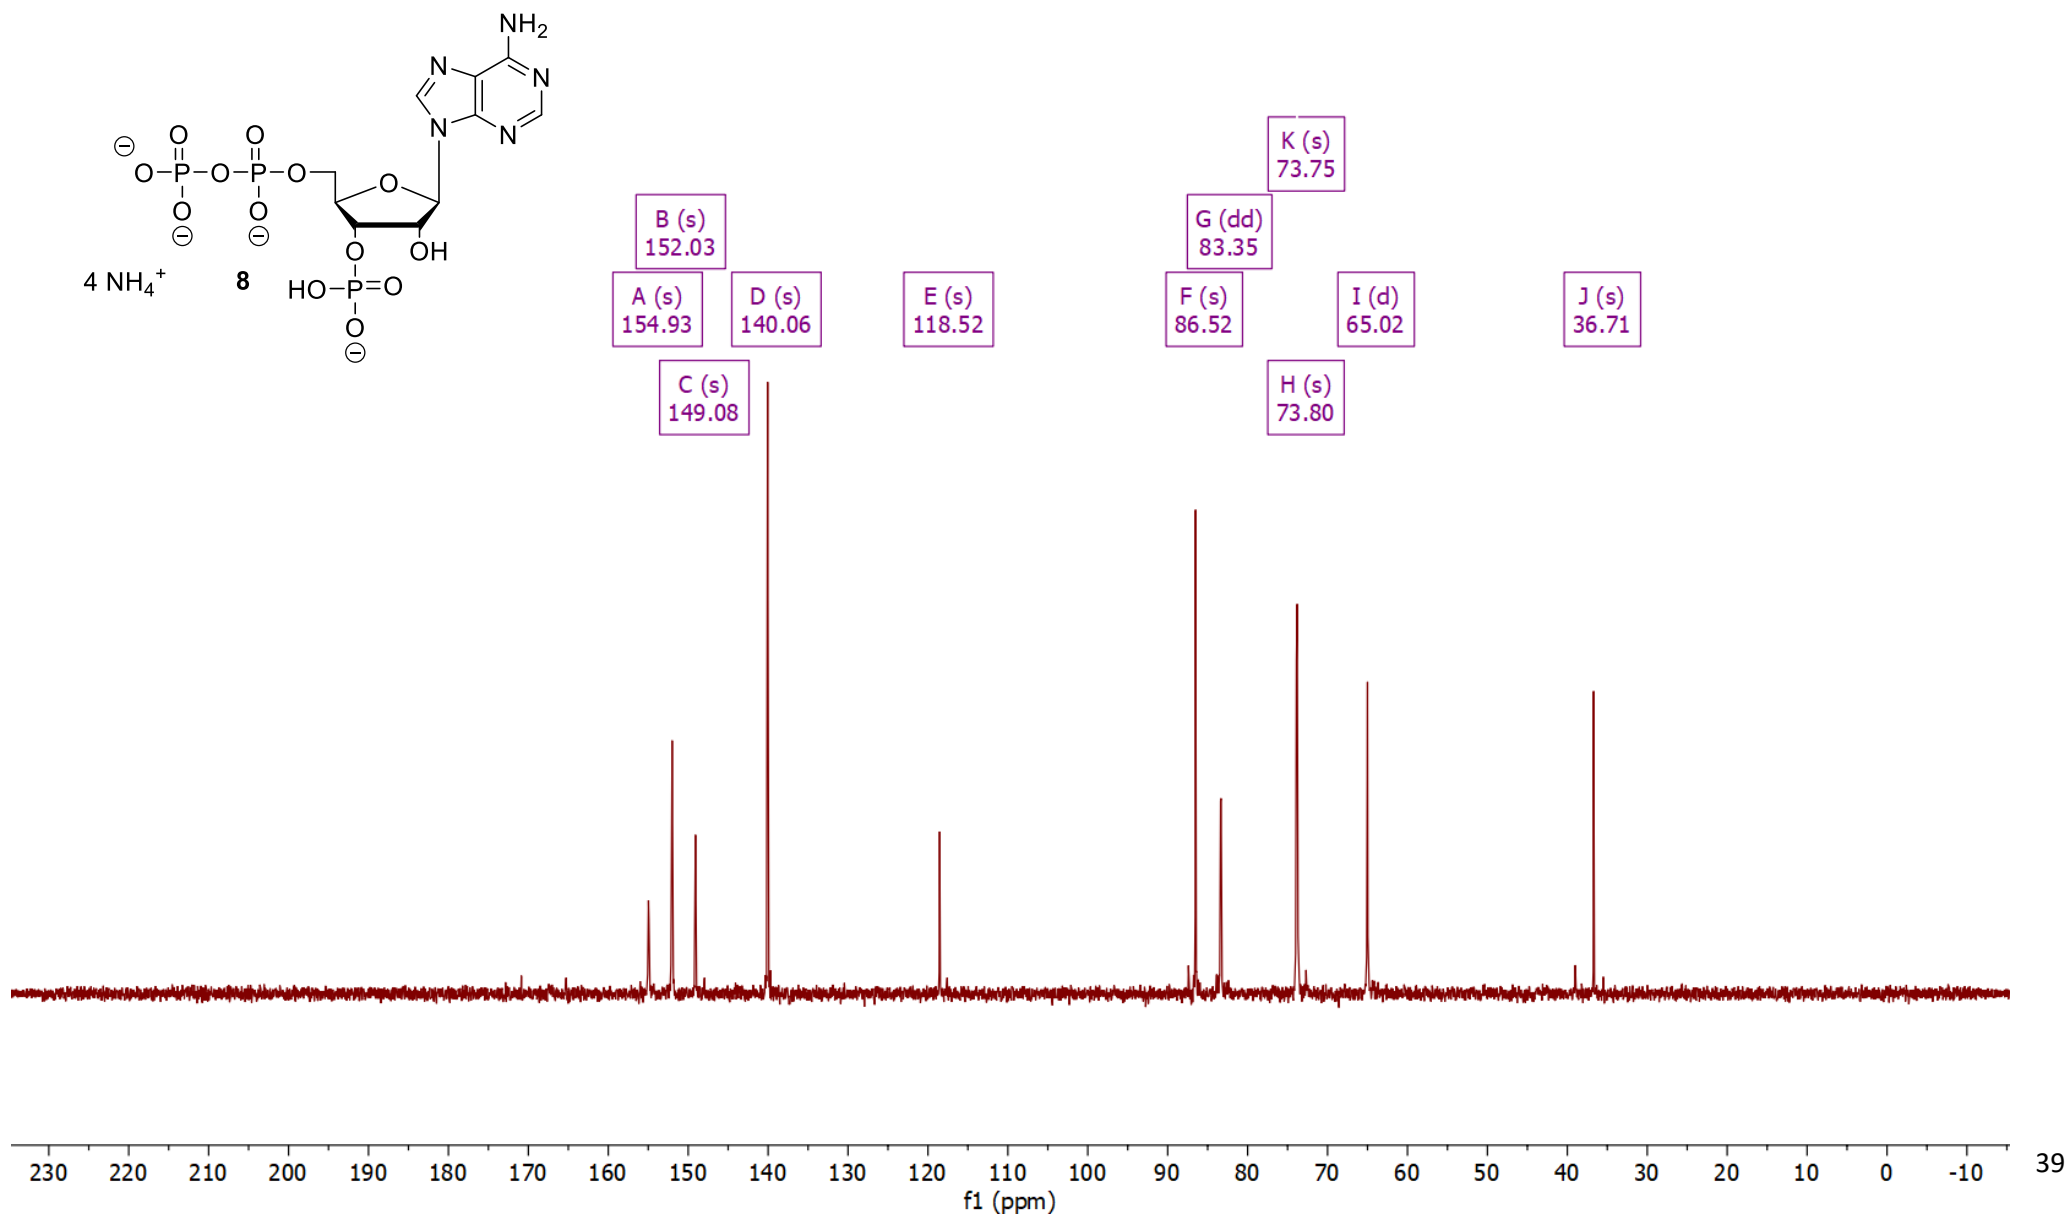

Compound **8** (ppApp),  $^{13}\text{C}[^1\text{H}]$ -NMR ( $\text{D}_2\text{O}$ , 101 MHz), detailed

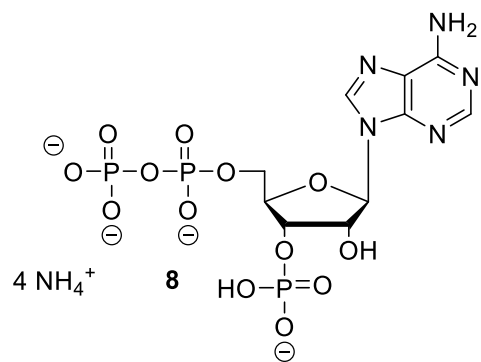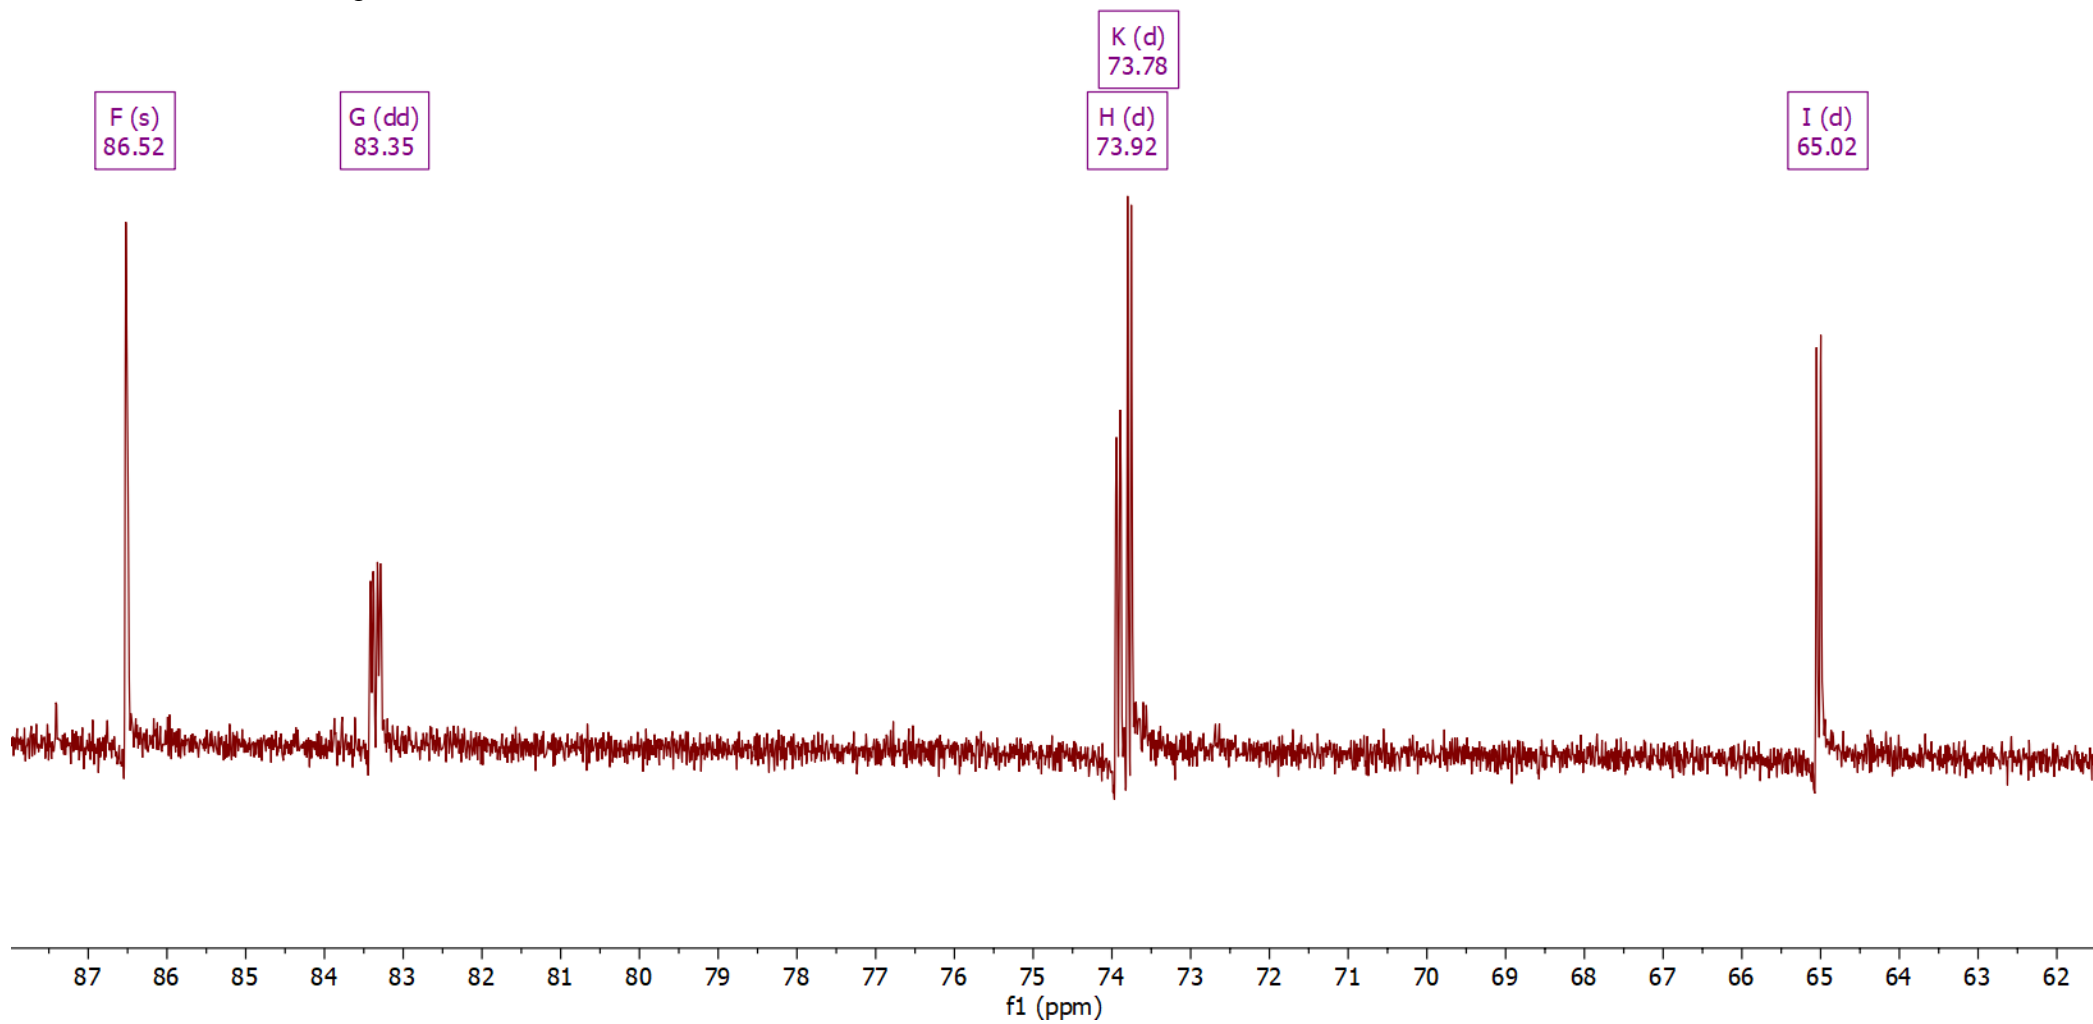

Compound **11** (ppGp),  $^1\text{H-NMR}$  ( $\text{D}_2\text{O}$ , 400 MHz)

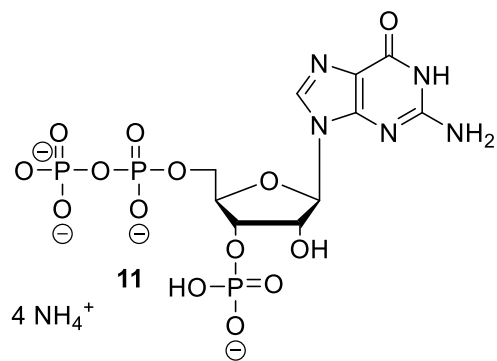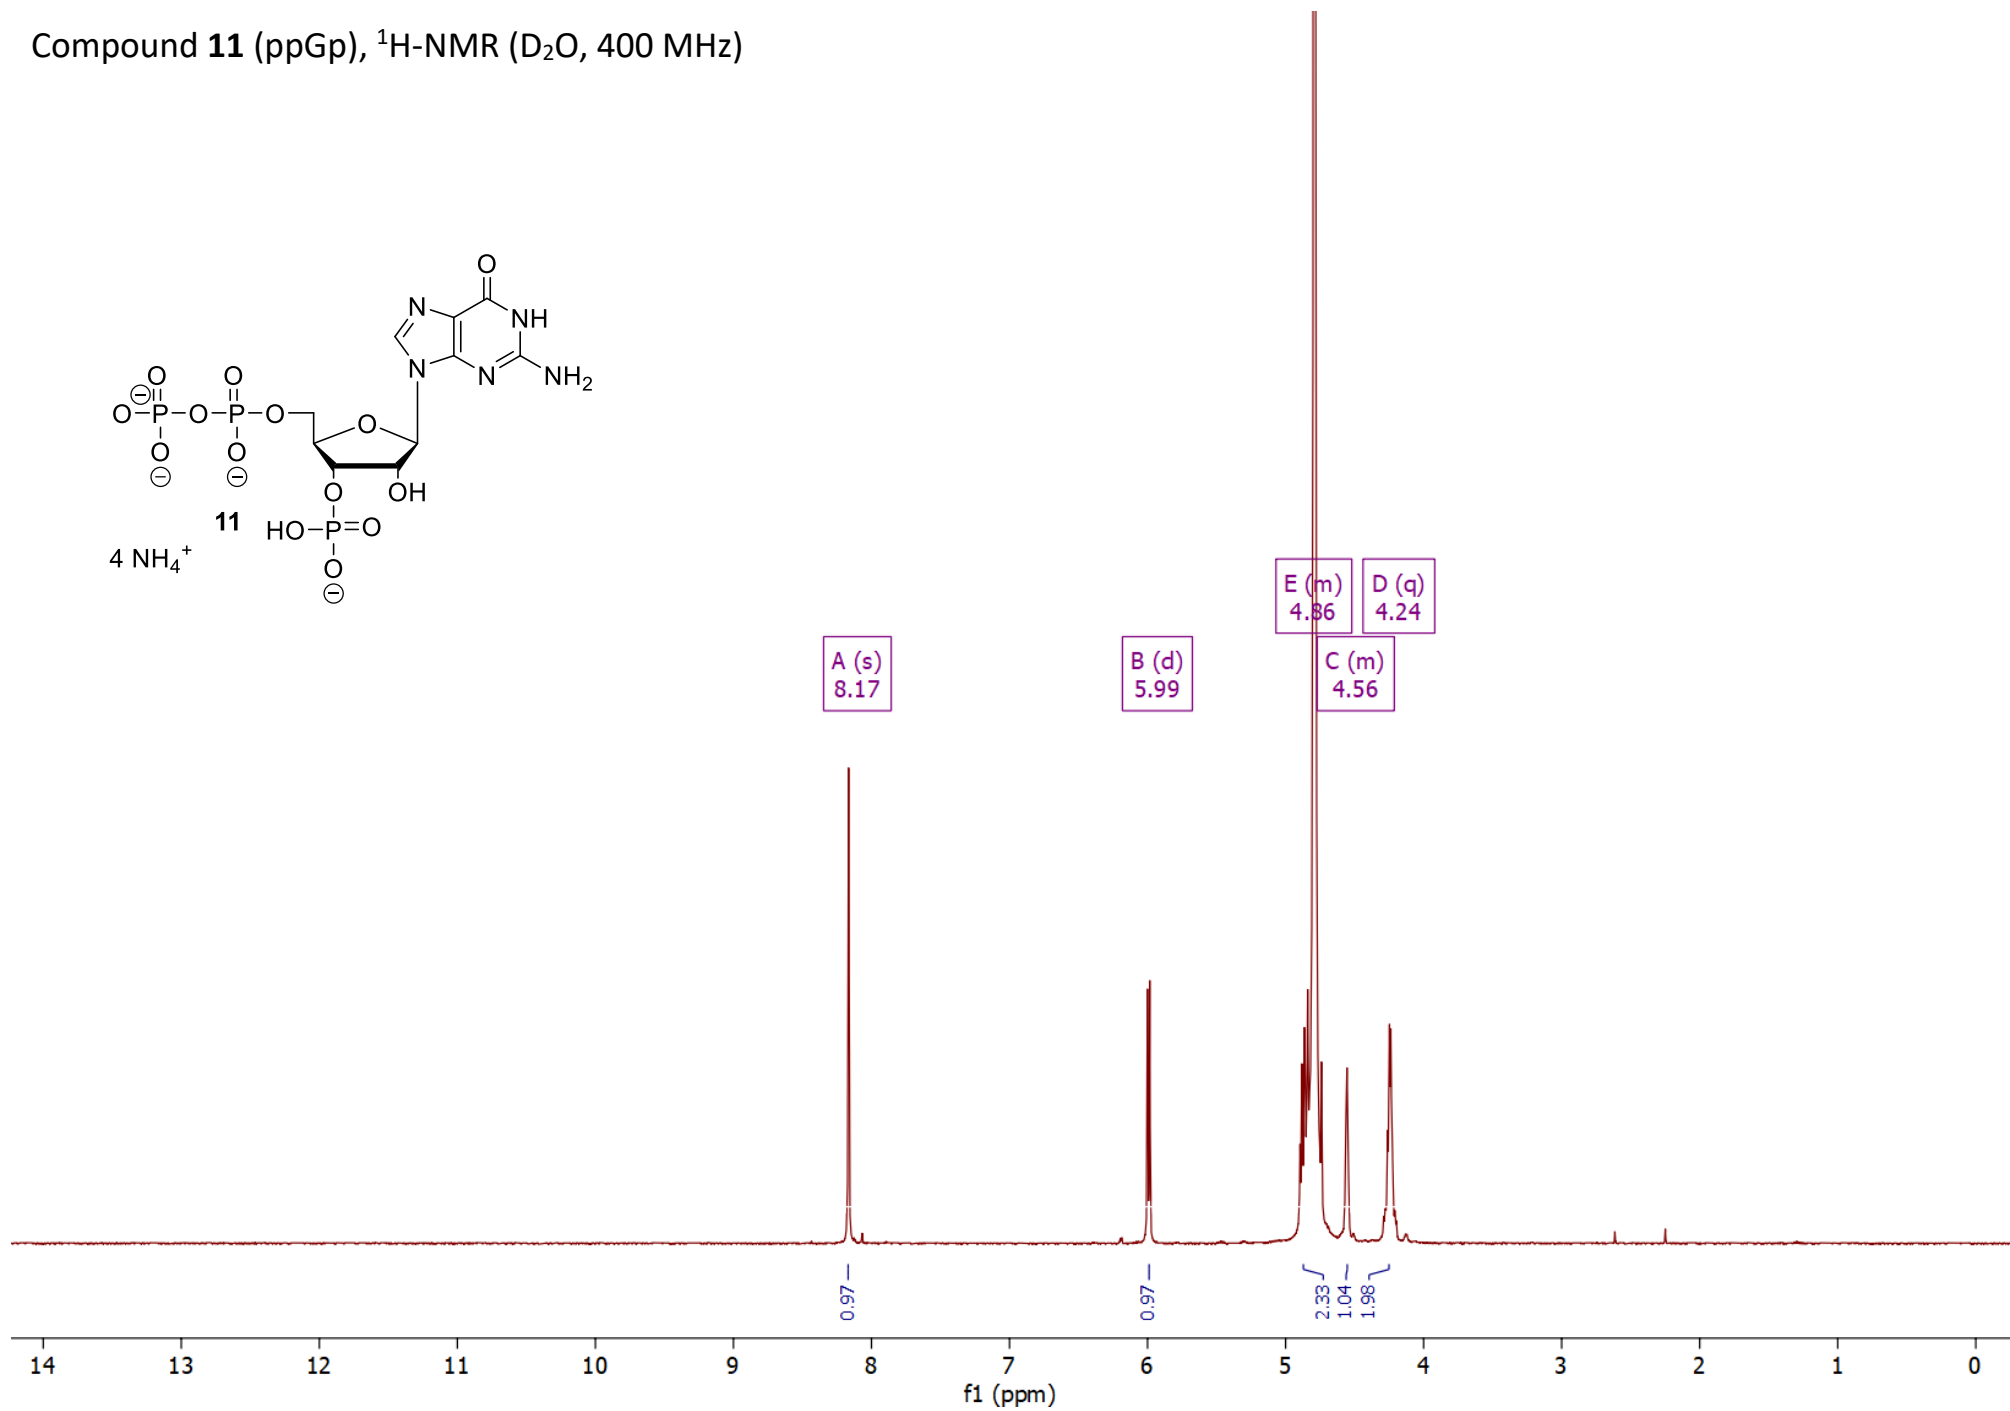

Compound **11** (ppGp), ed-HSQC (D<sub>2</sub>O)

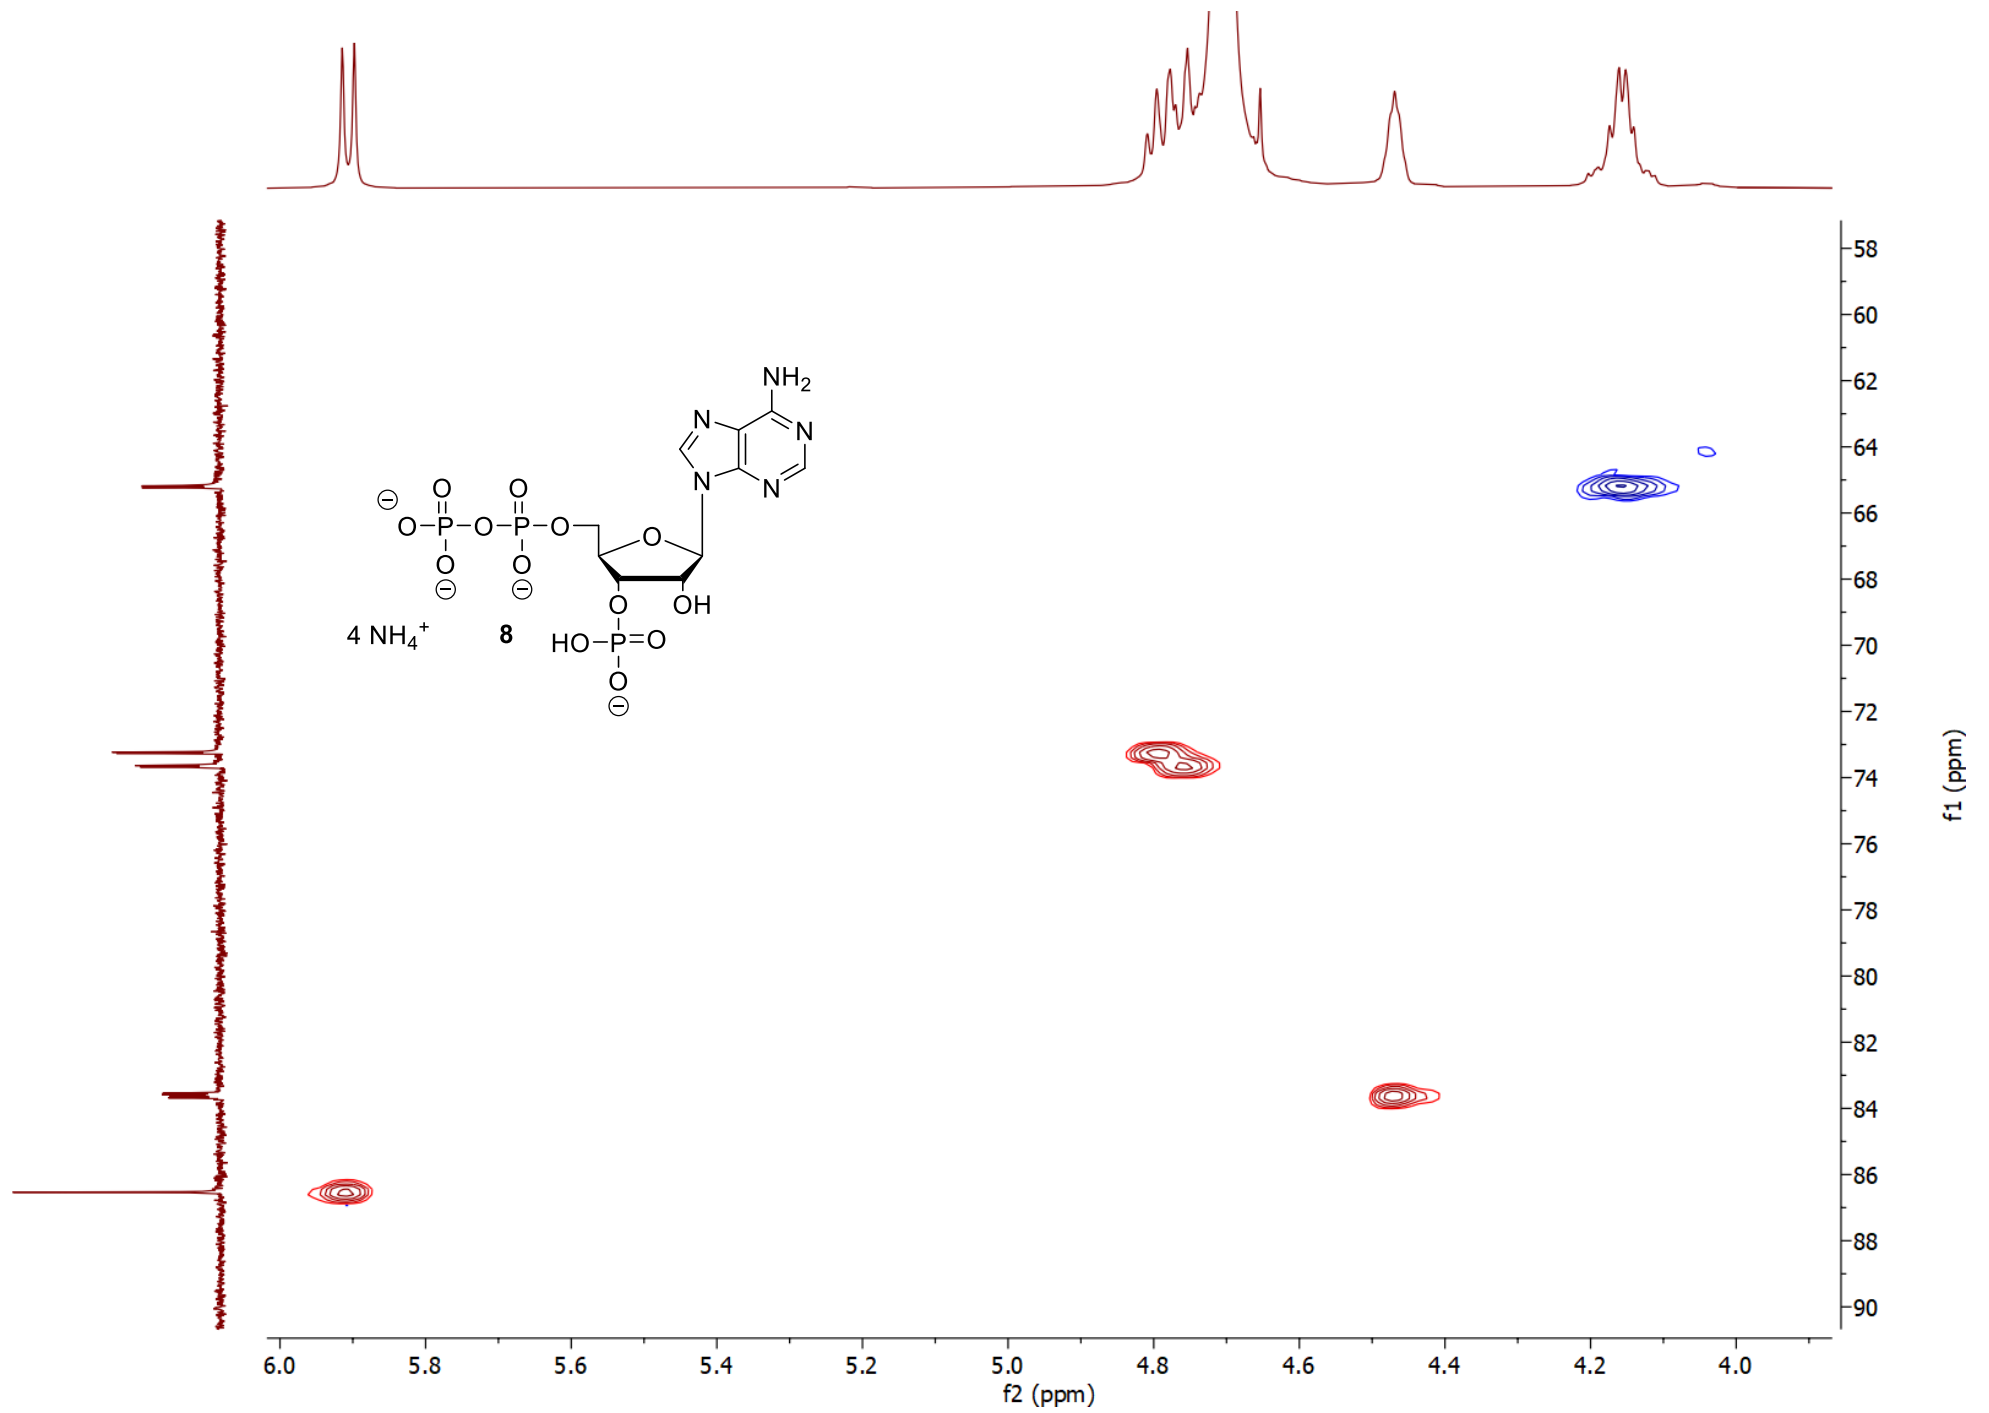

Compound **11** (ppGp),  $^{31}\text{P}$ [ $^1\text{H}$ ] - NMR ( $\text{D}_2\text{O}$ , 162 MHz)

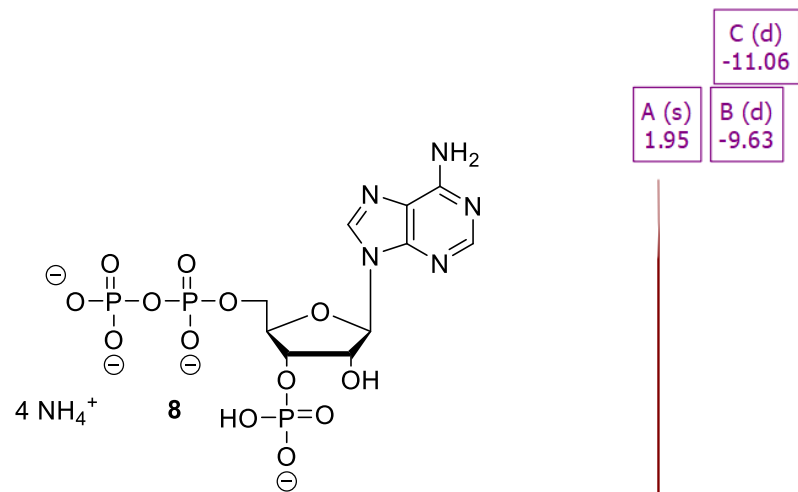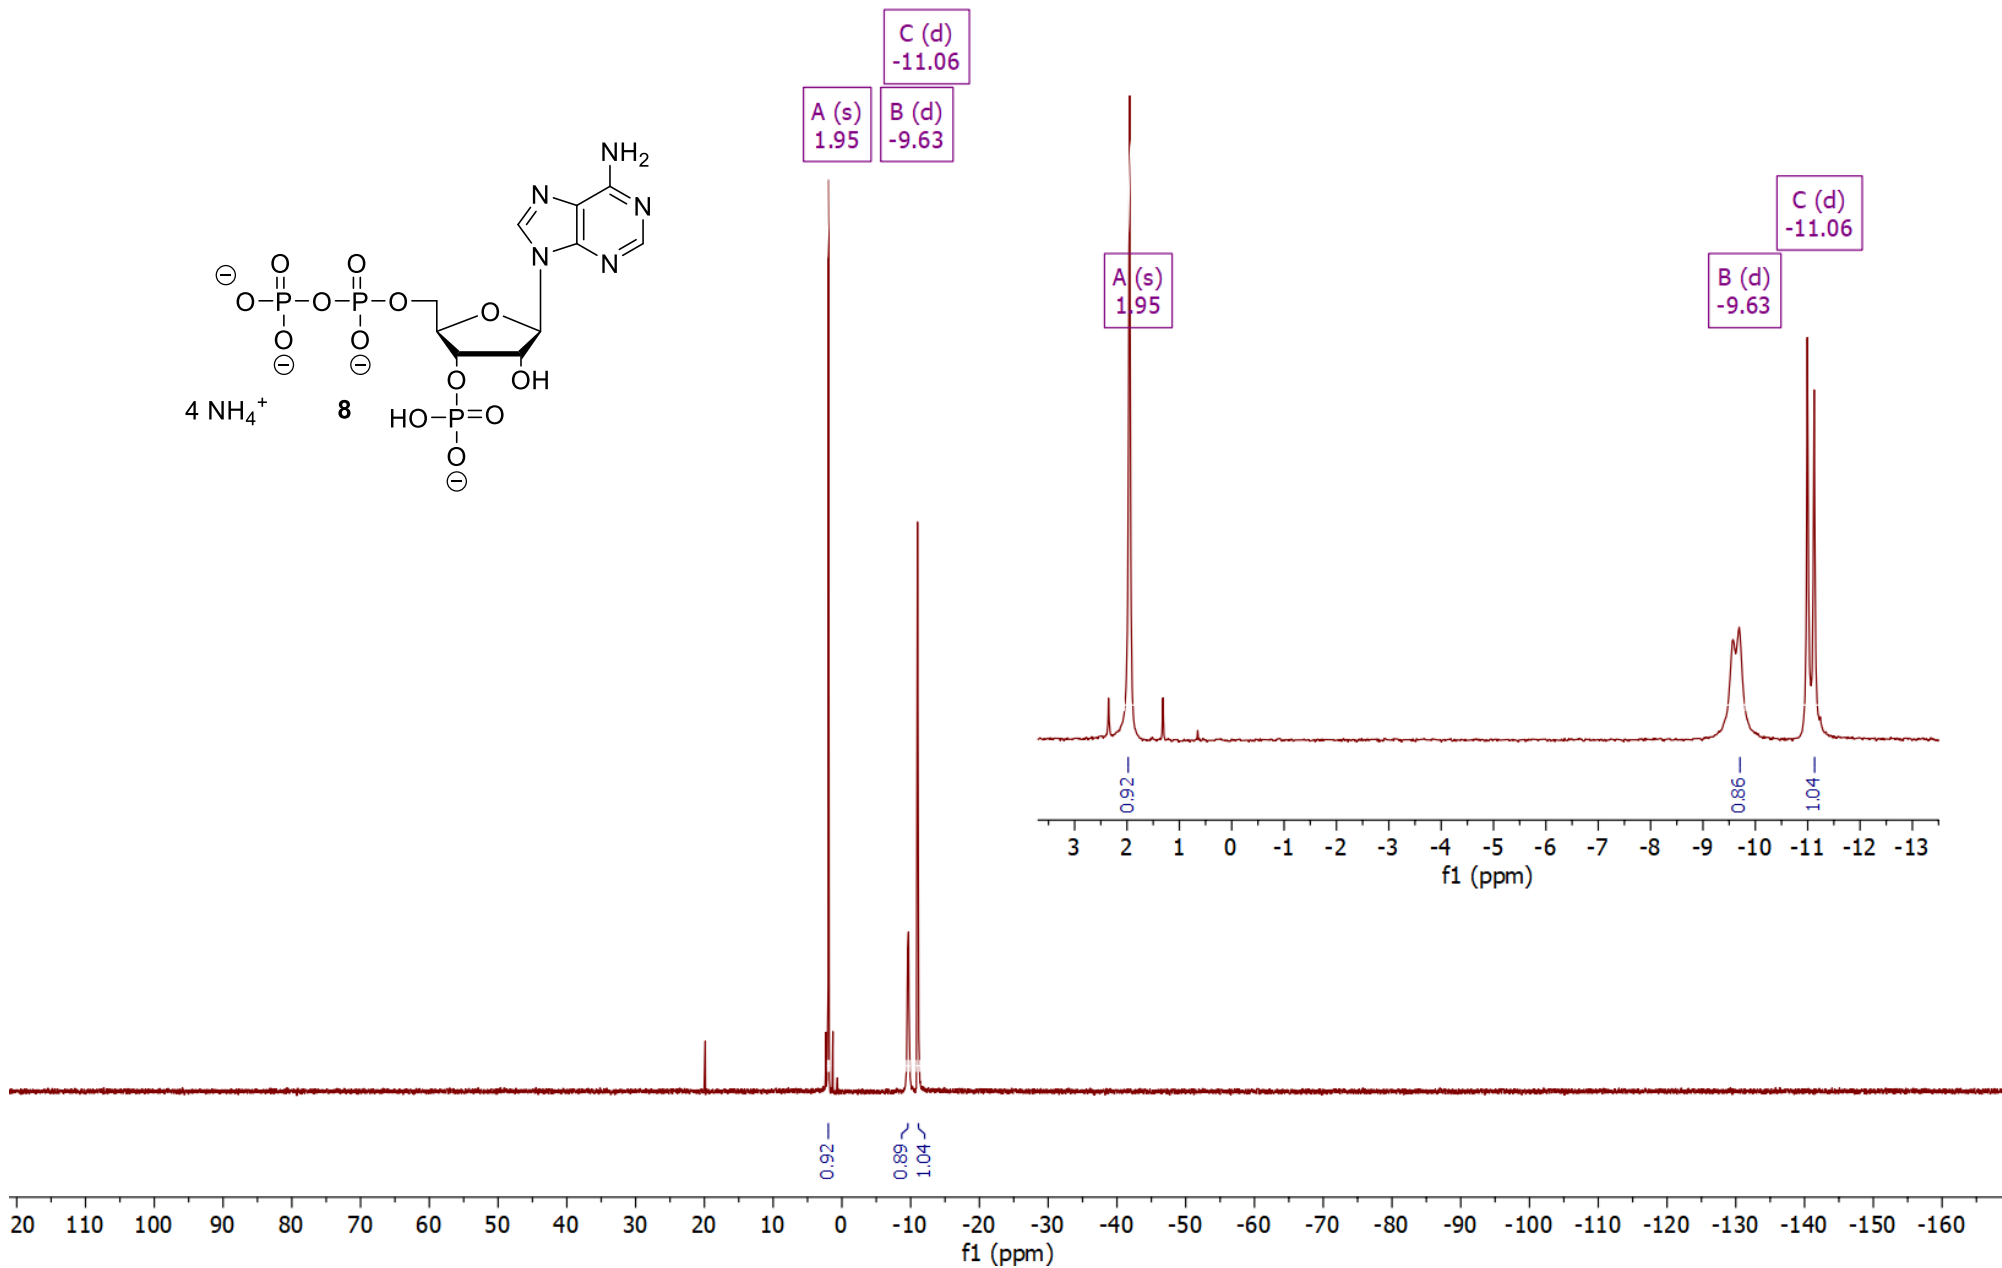

Compound **11** (ppGp),  $^{13}\text{C}[^1\text{H}]$  - NMR ( $\text{D}_2\text{O}$ , 101 MHz)

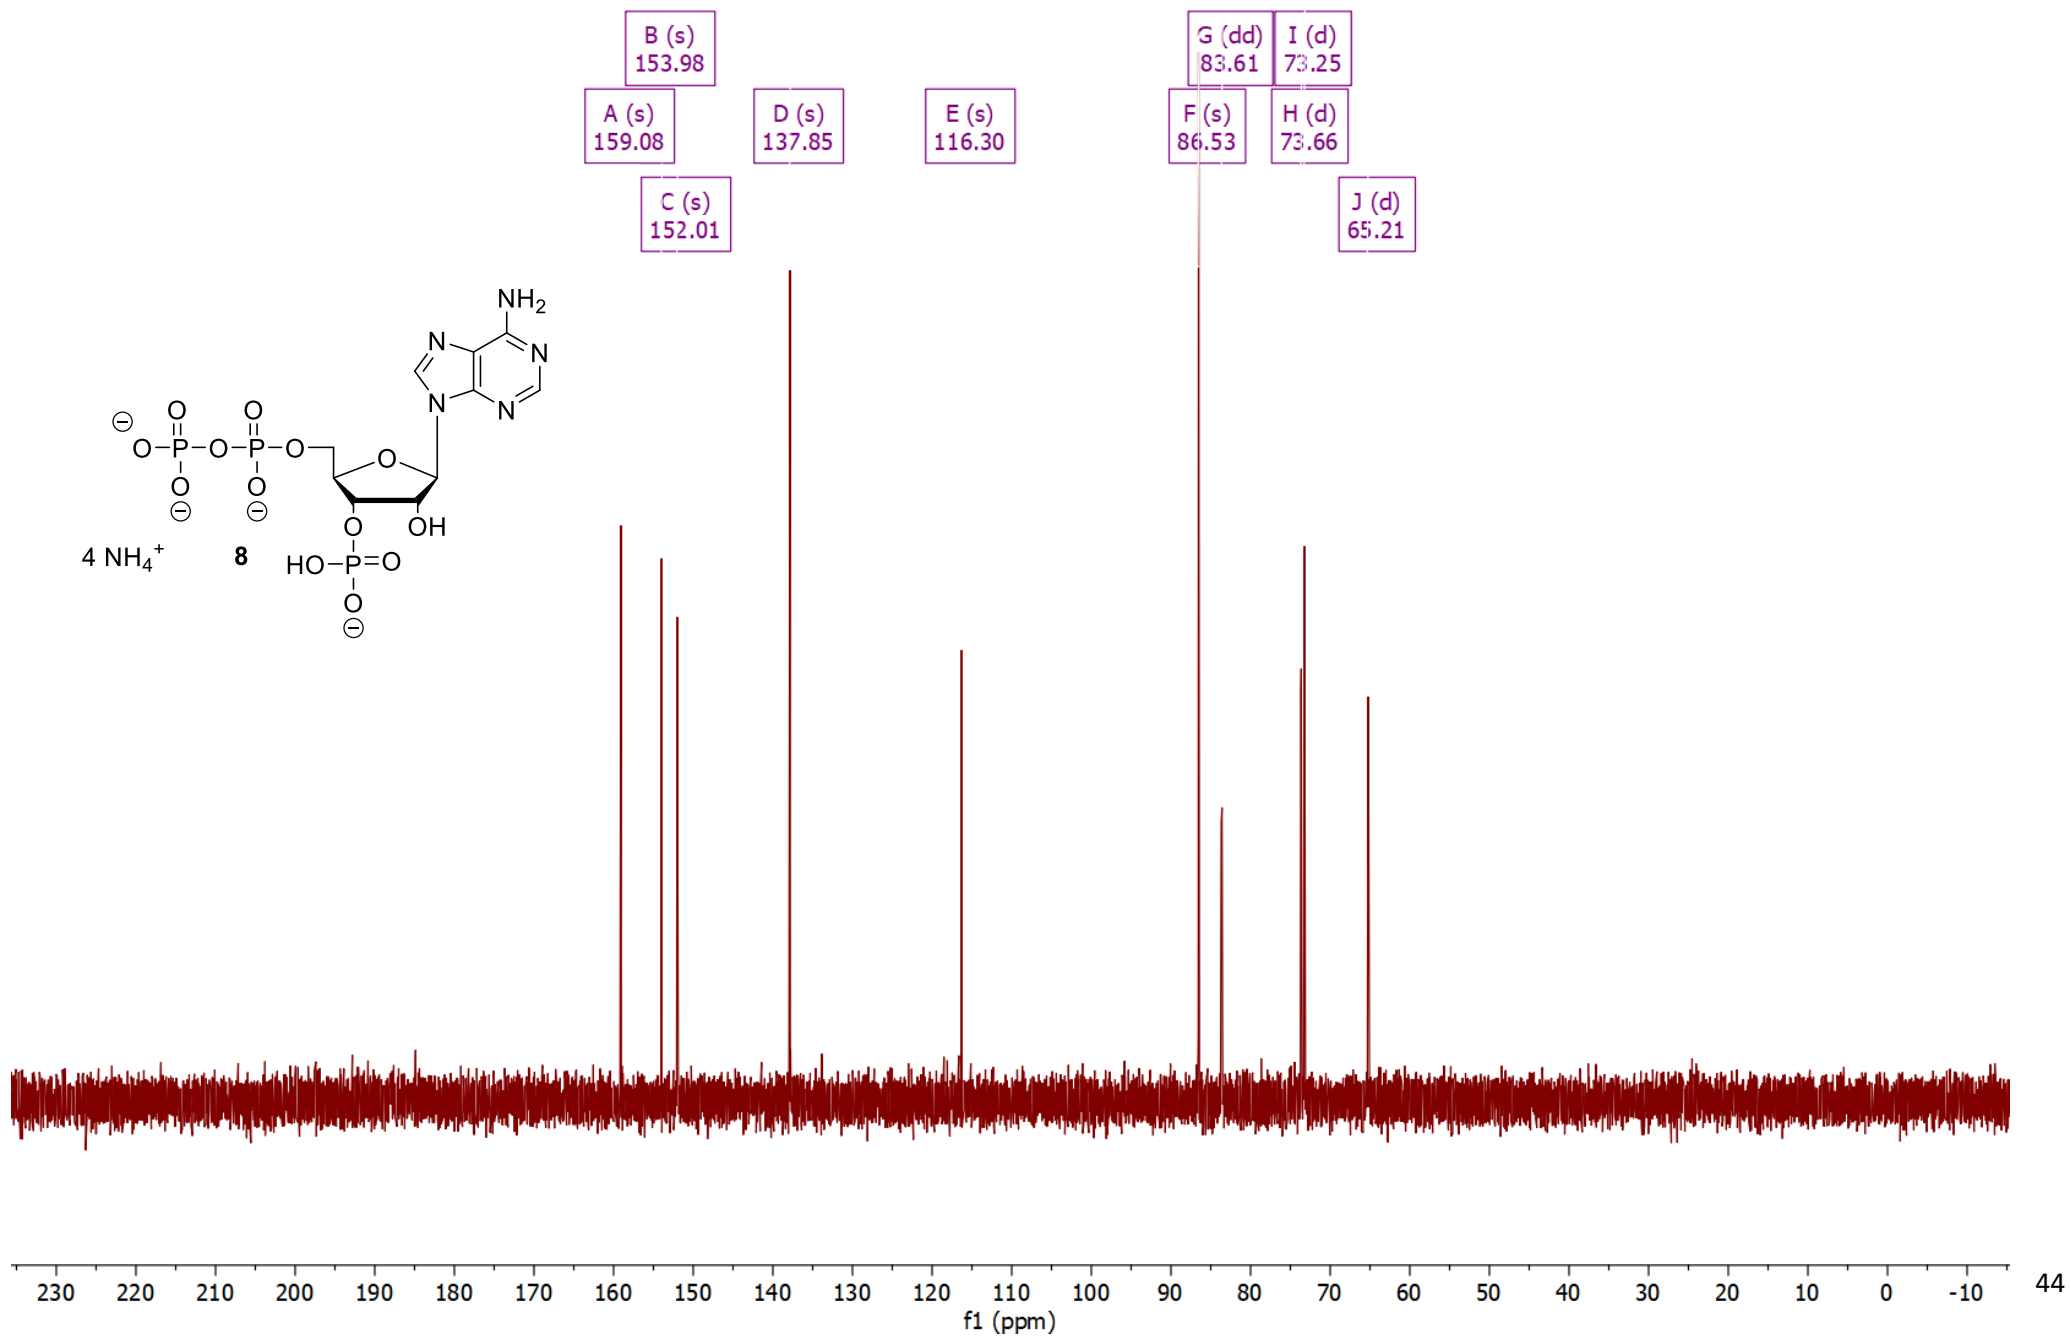

Compound **11** (ppGp),  $^{13}\text{C}$ [ $^1\text{H}$ ]-NMR ( $\text{D}_2\text{O}$ , 101 MHz), detailed

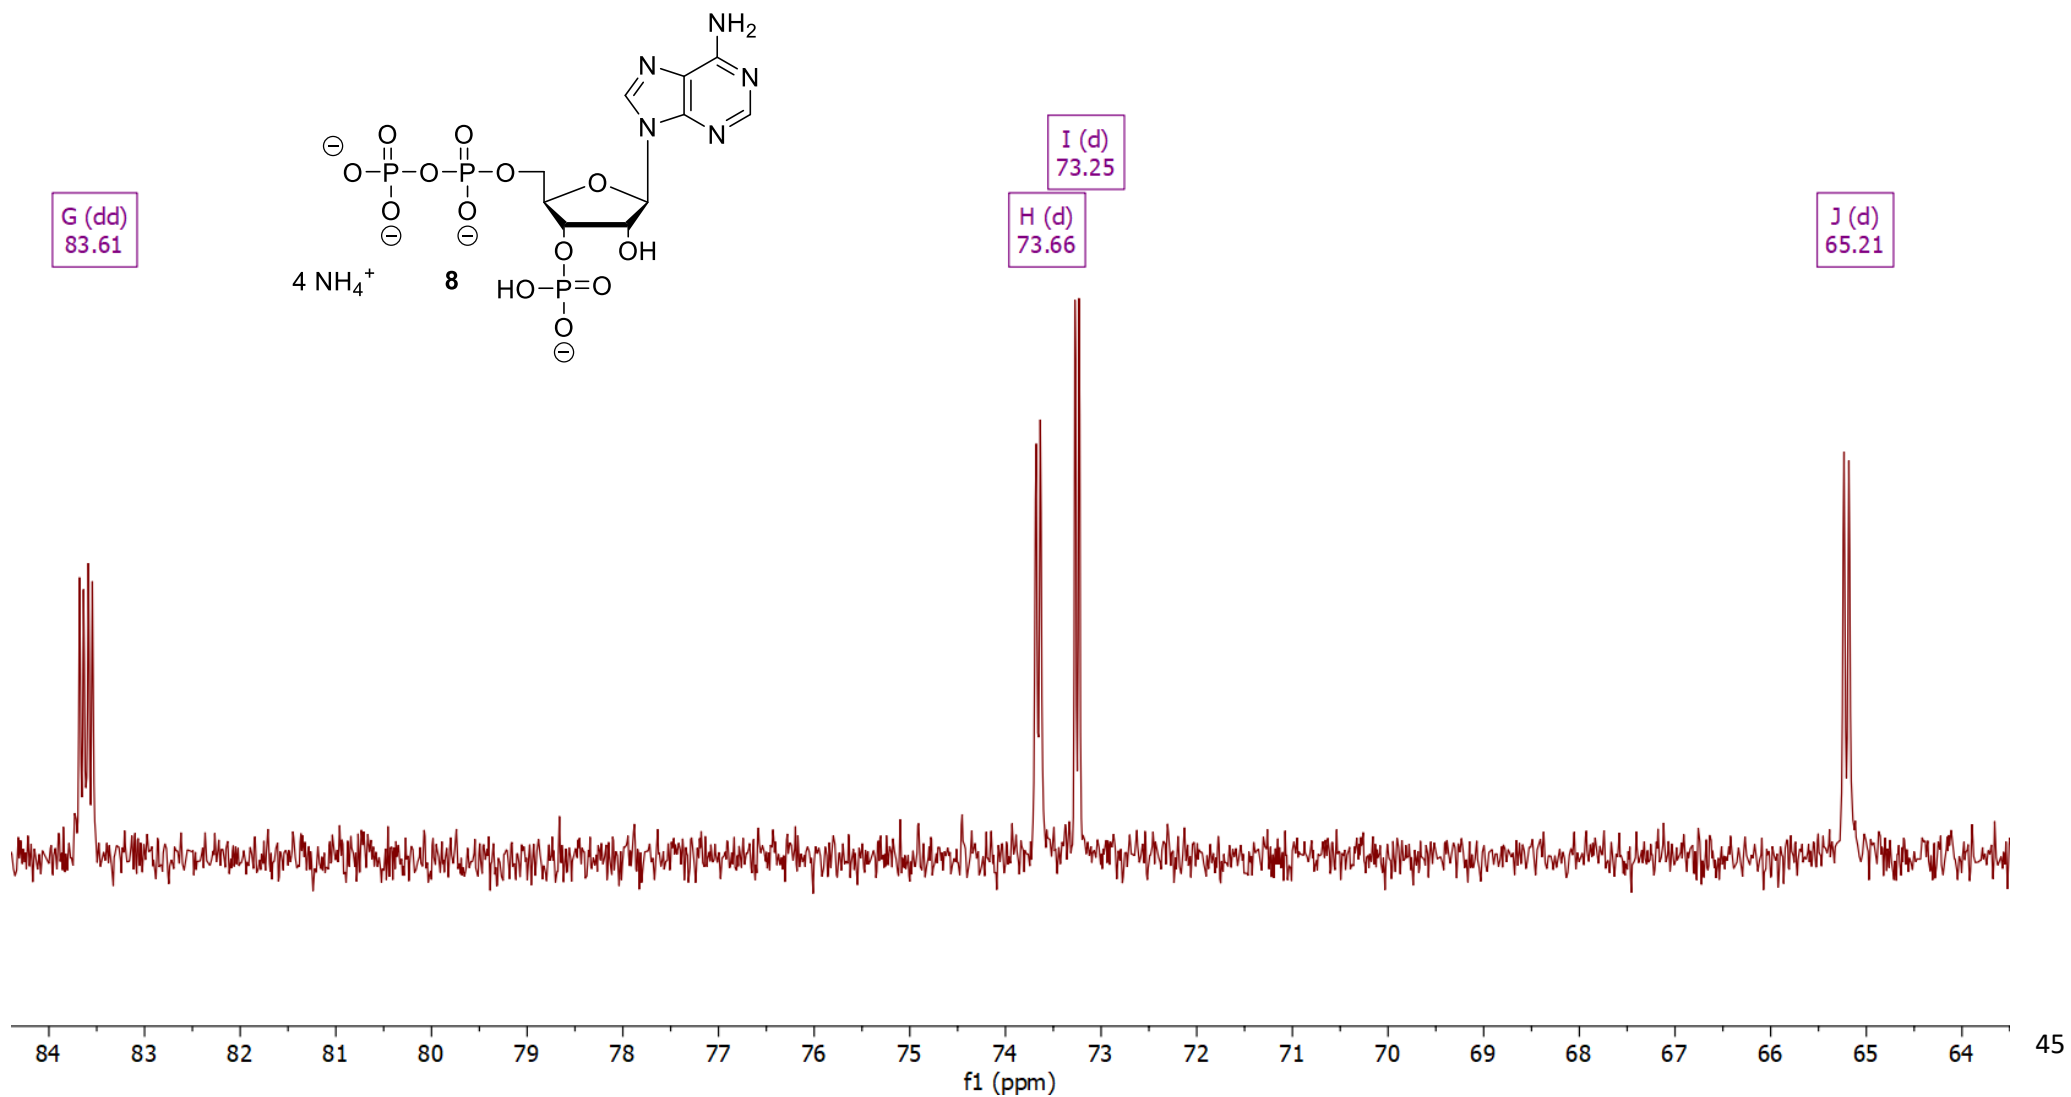

Compound **13** (pppApp),  $^1\text{H-NMR}$  ( $\text{D}_2\text{O}$ , 400 MHz)

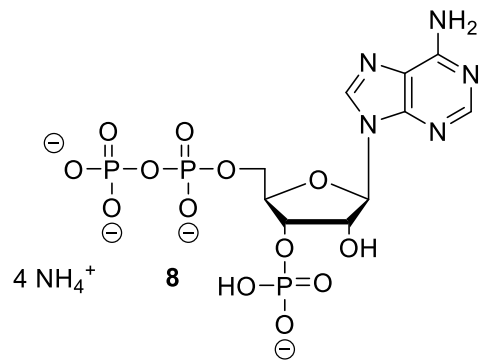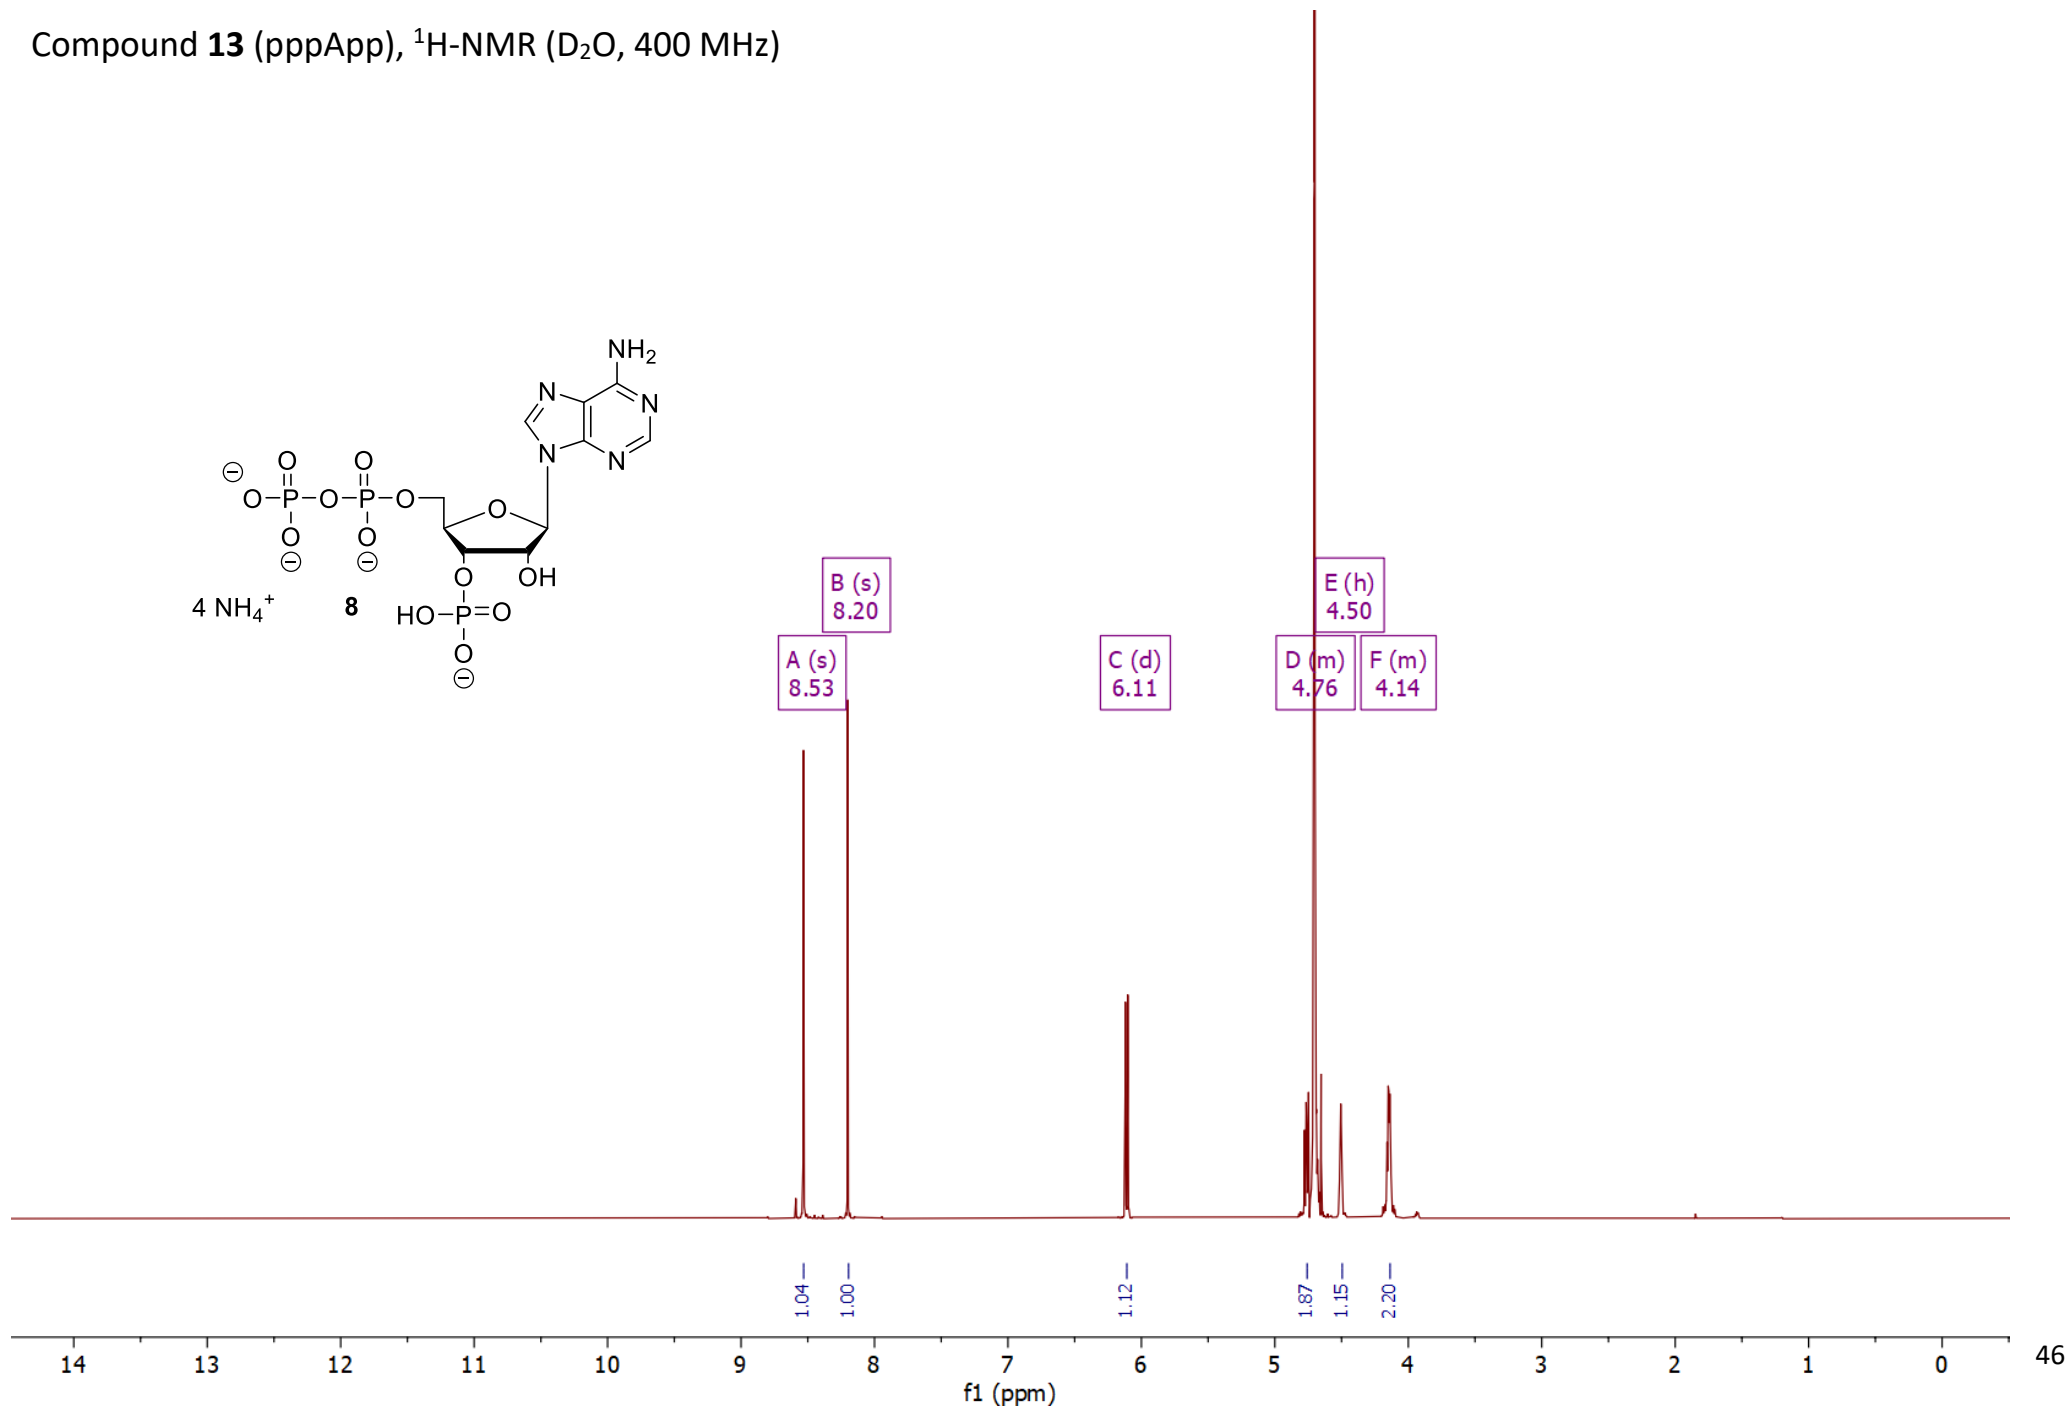

Compound **13** (pppApp),  $^{31}\text{P}\{^1\text{H}\}$ -NMR ( $\text{D}_2\text{O}$ , 162 MHz)

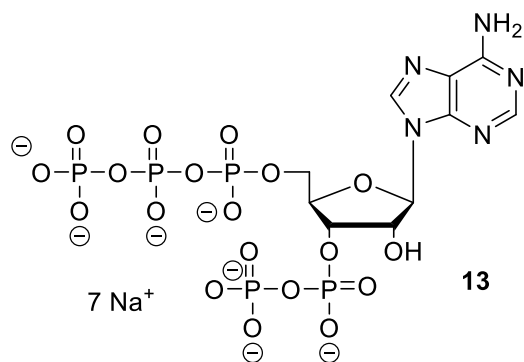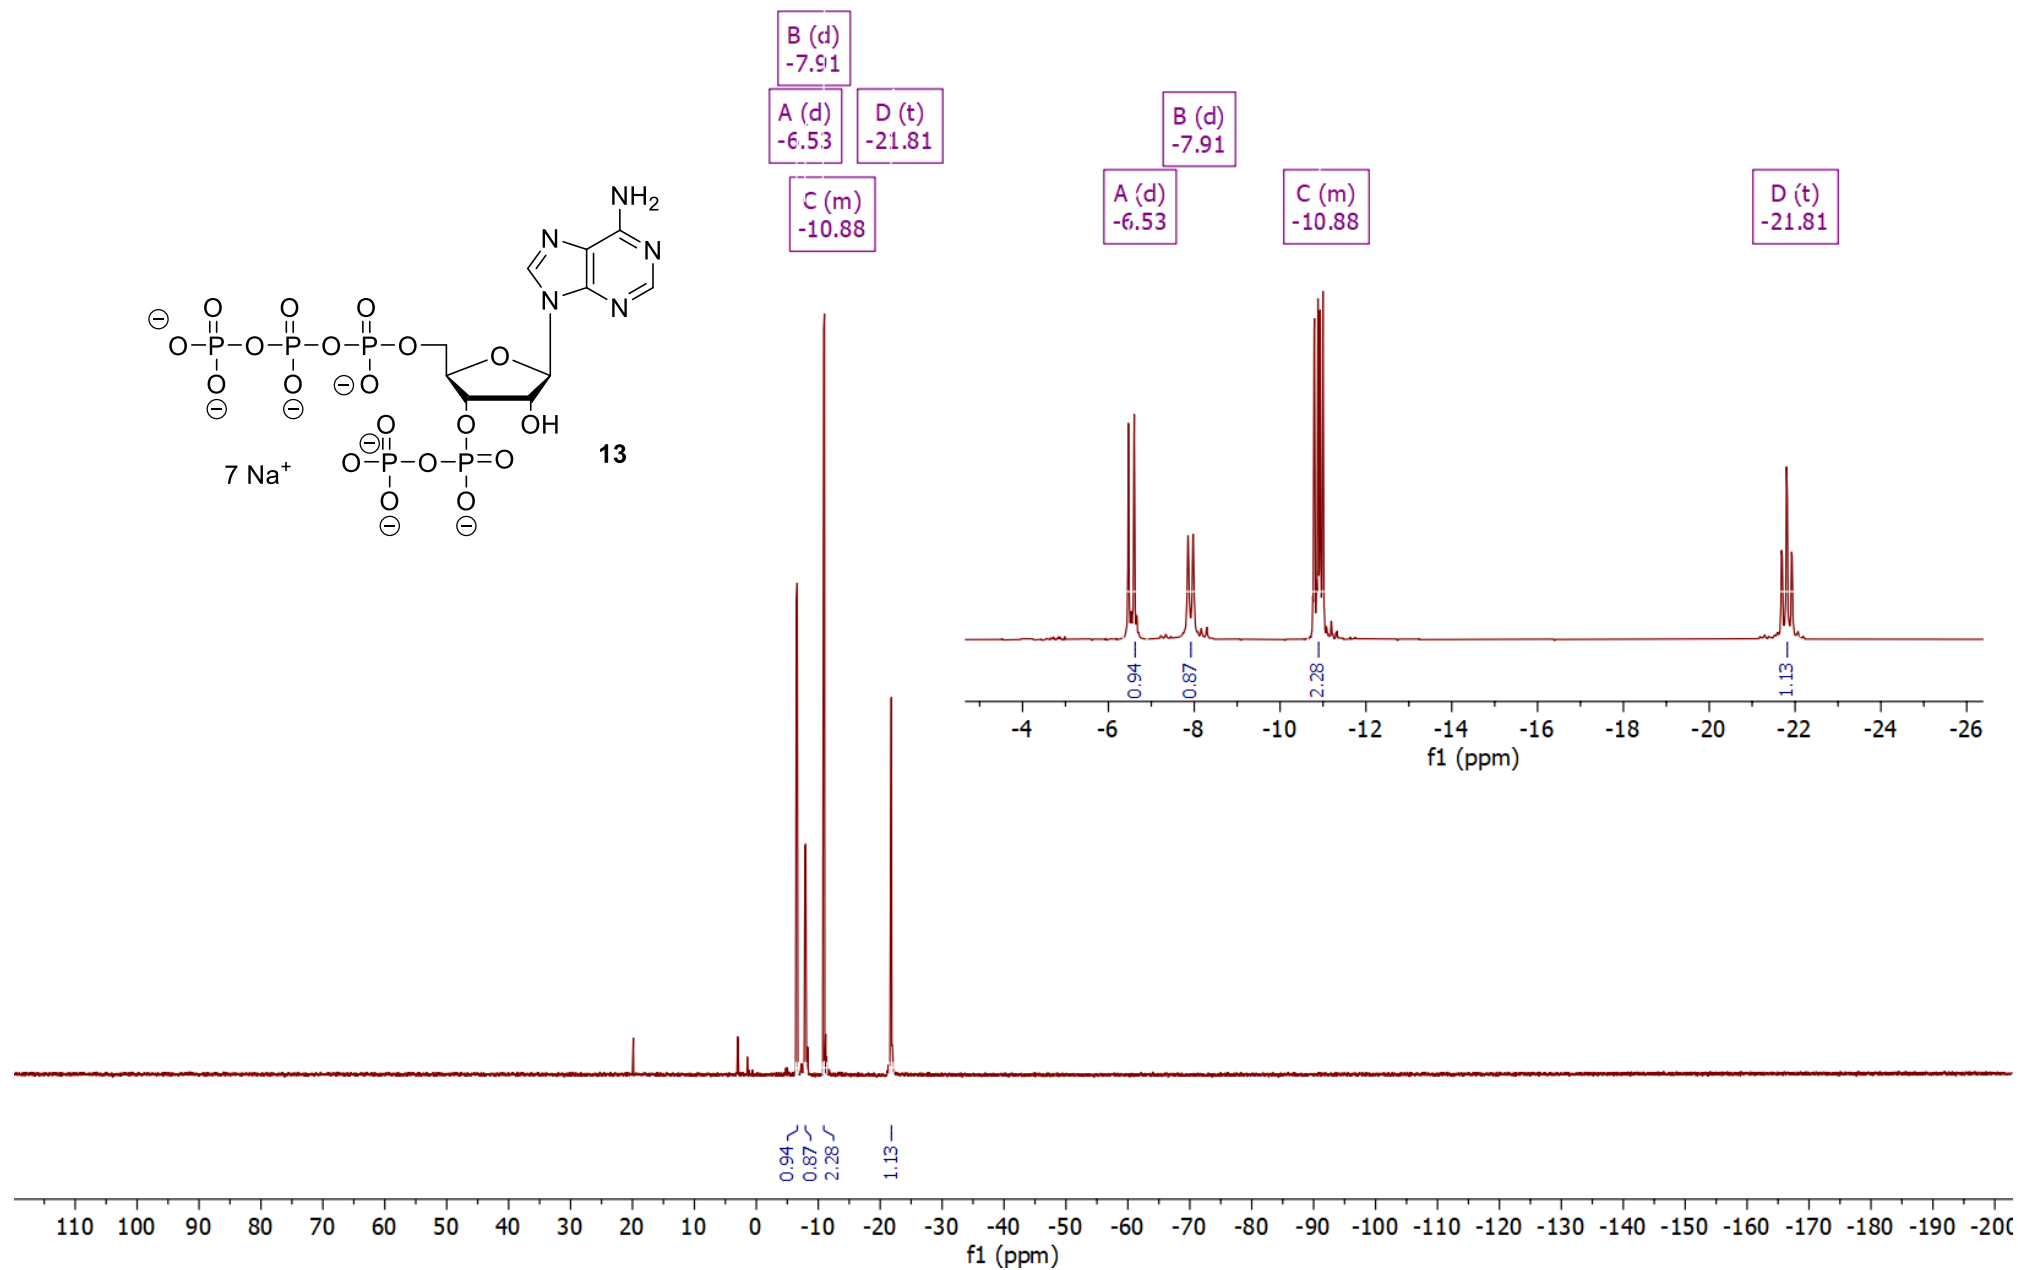

Compound **13** (pppApp),  $^{13}\text{C}$ [ $^1\text{H}$ ]-NMR ( $\text{D}_2\text{O}$ , 101 MHz)

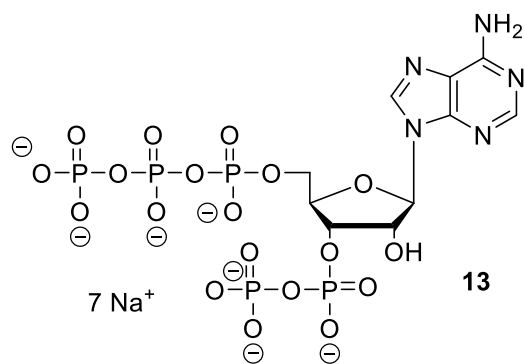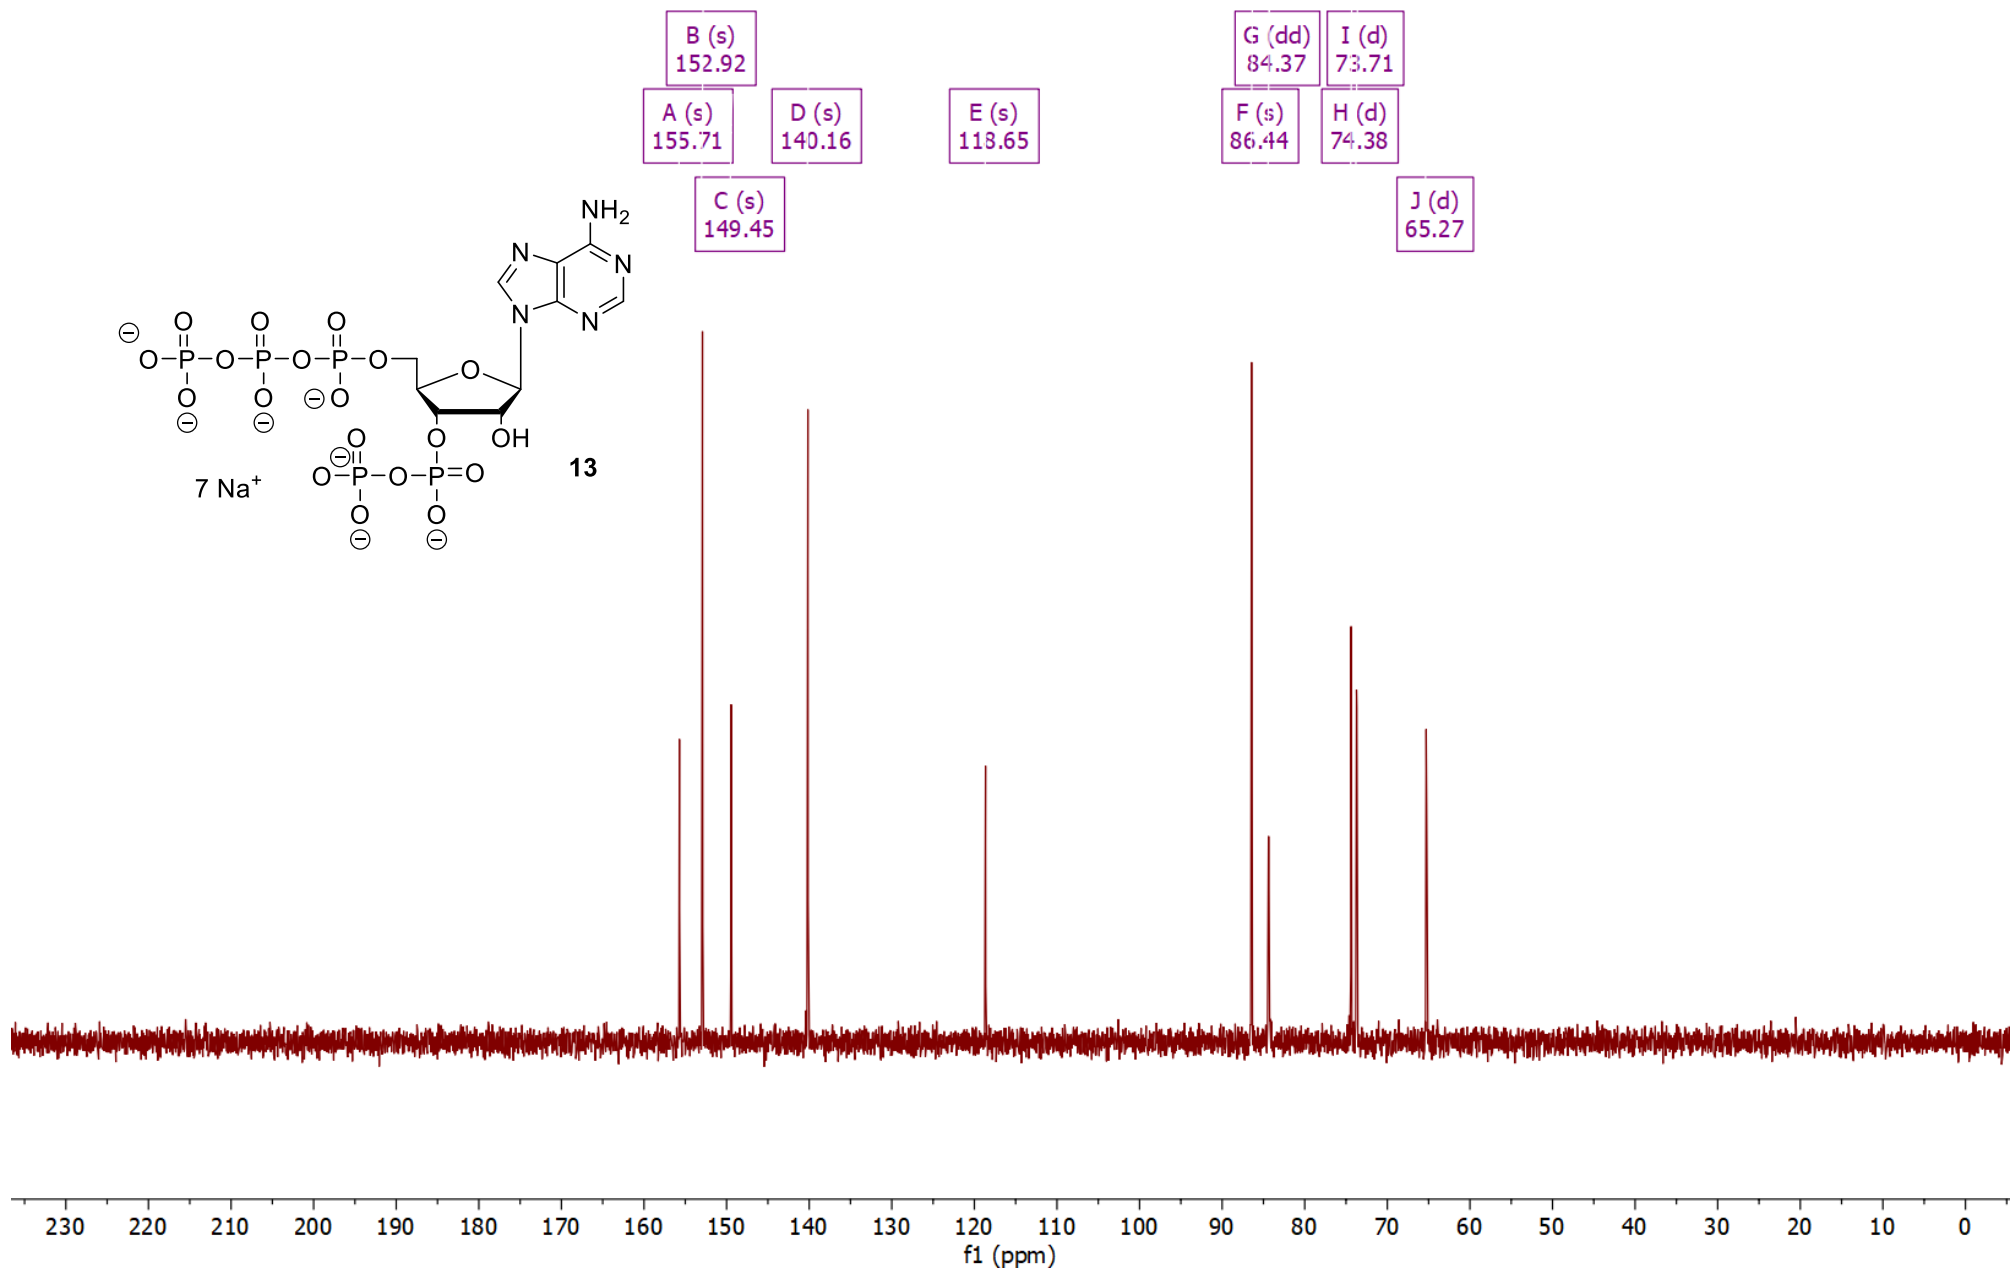

Compound **13** (pppApp),  $^{13}\text{C}$ [ $^1\text{H}$ ]-NMR ( $\text{D}_2\text{O}$ , 101 MHz), detailed

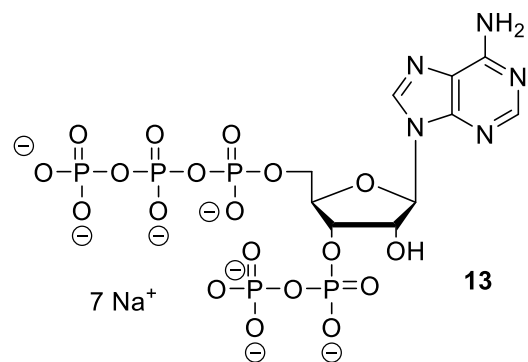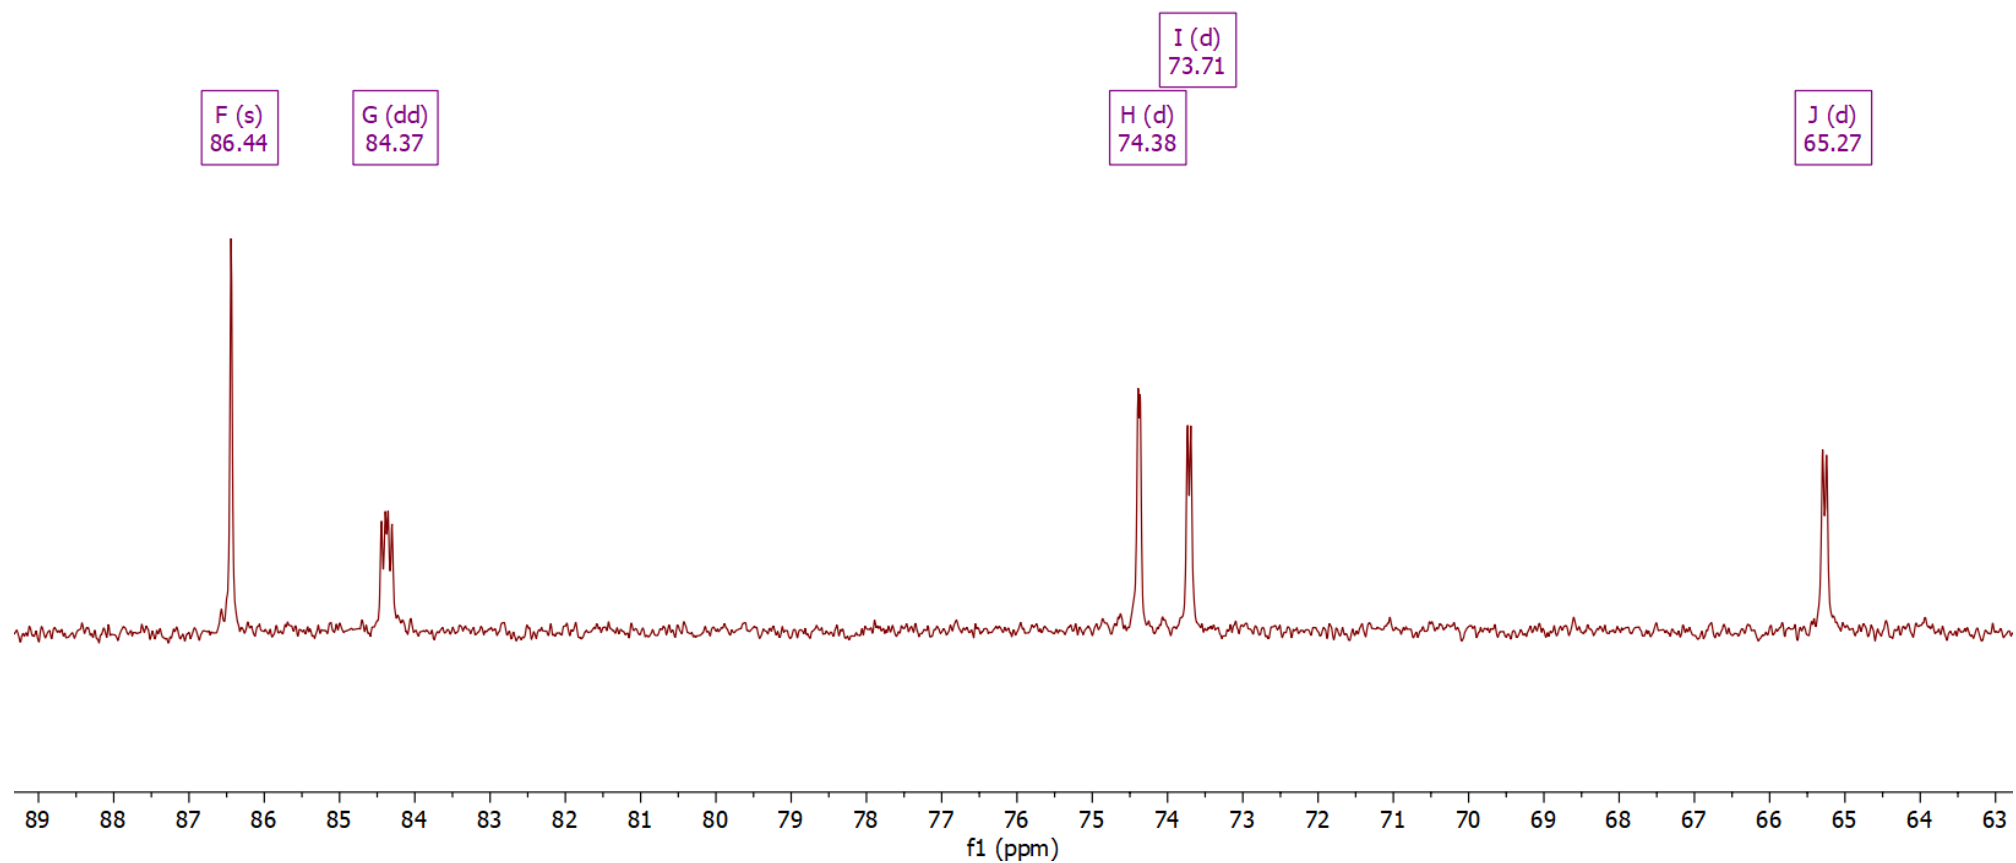

Compound **12** (pppGpp), <sup>1</sup>H-NMR (D<sub>2</sub>O, 400 MHz)

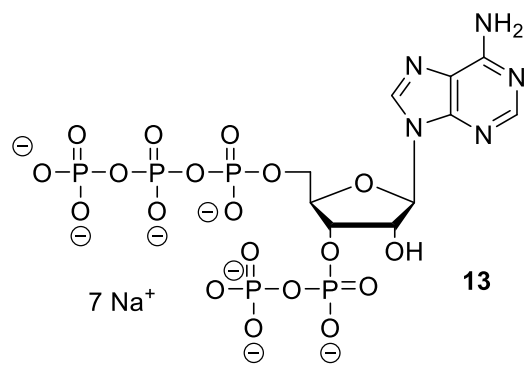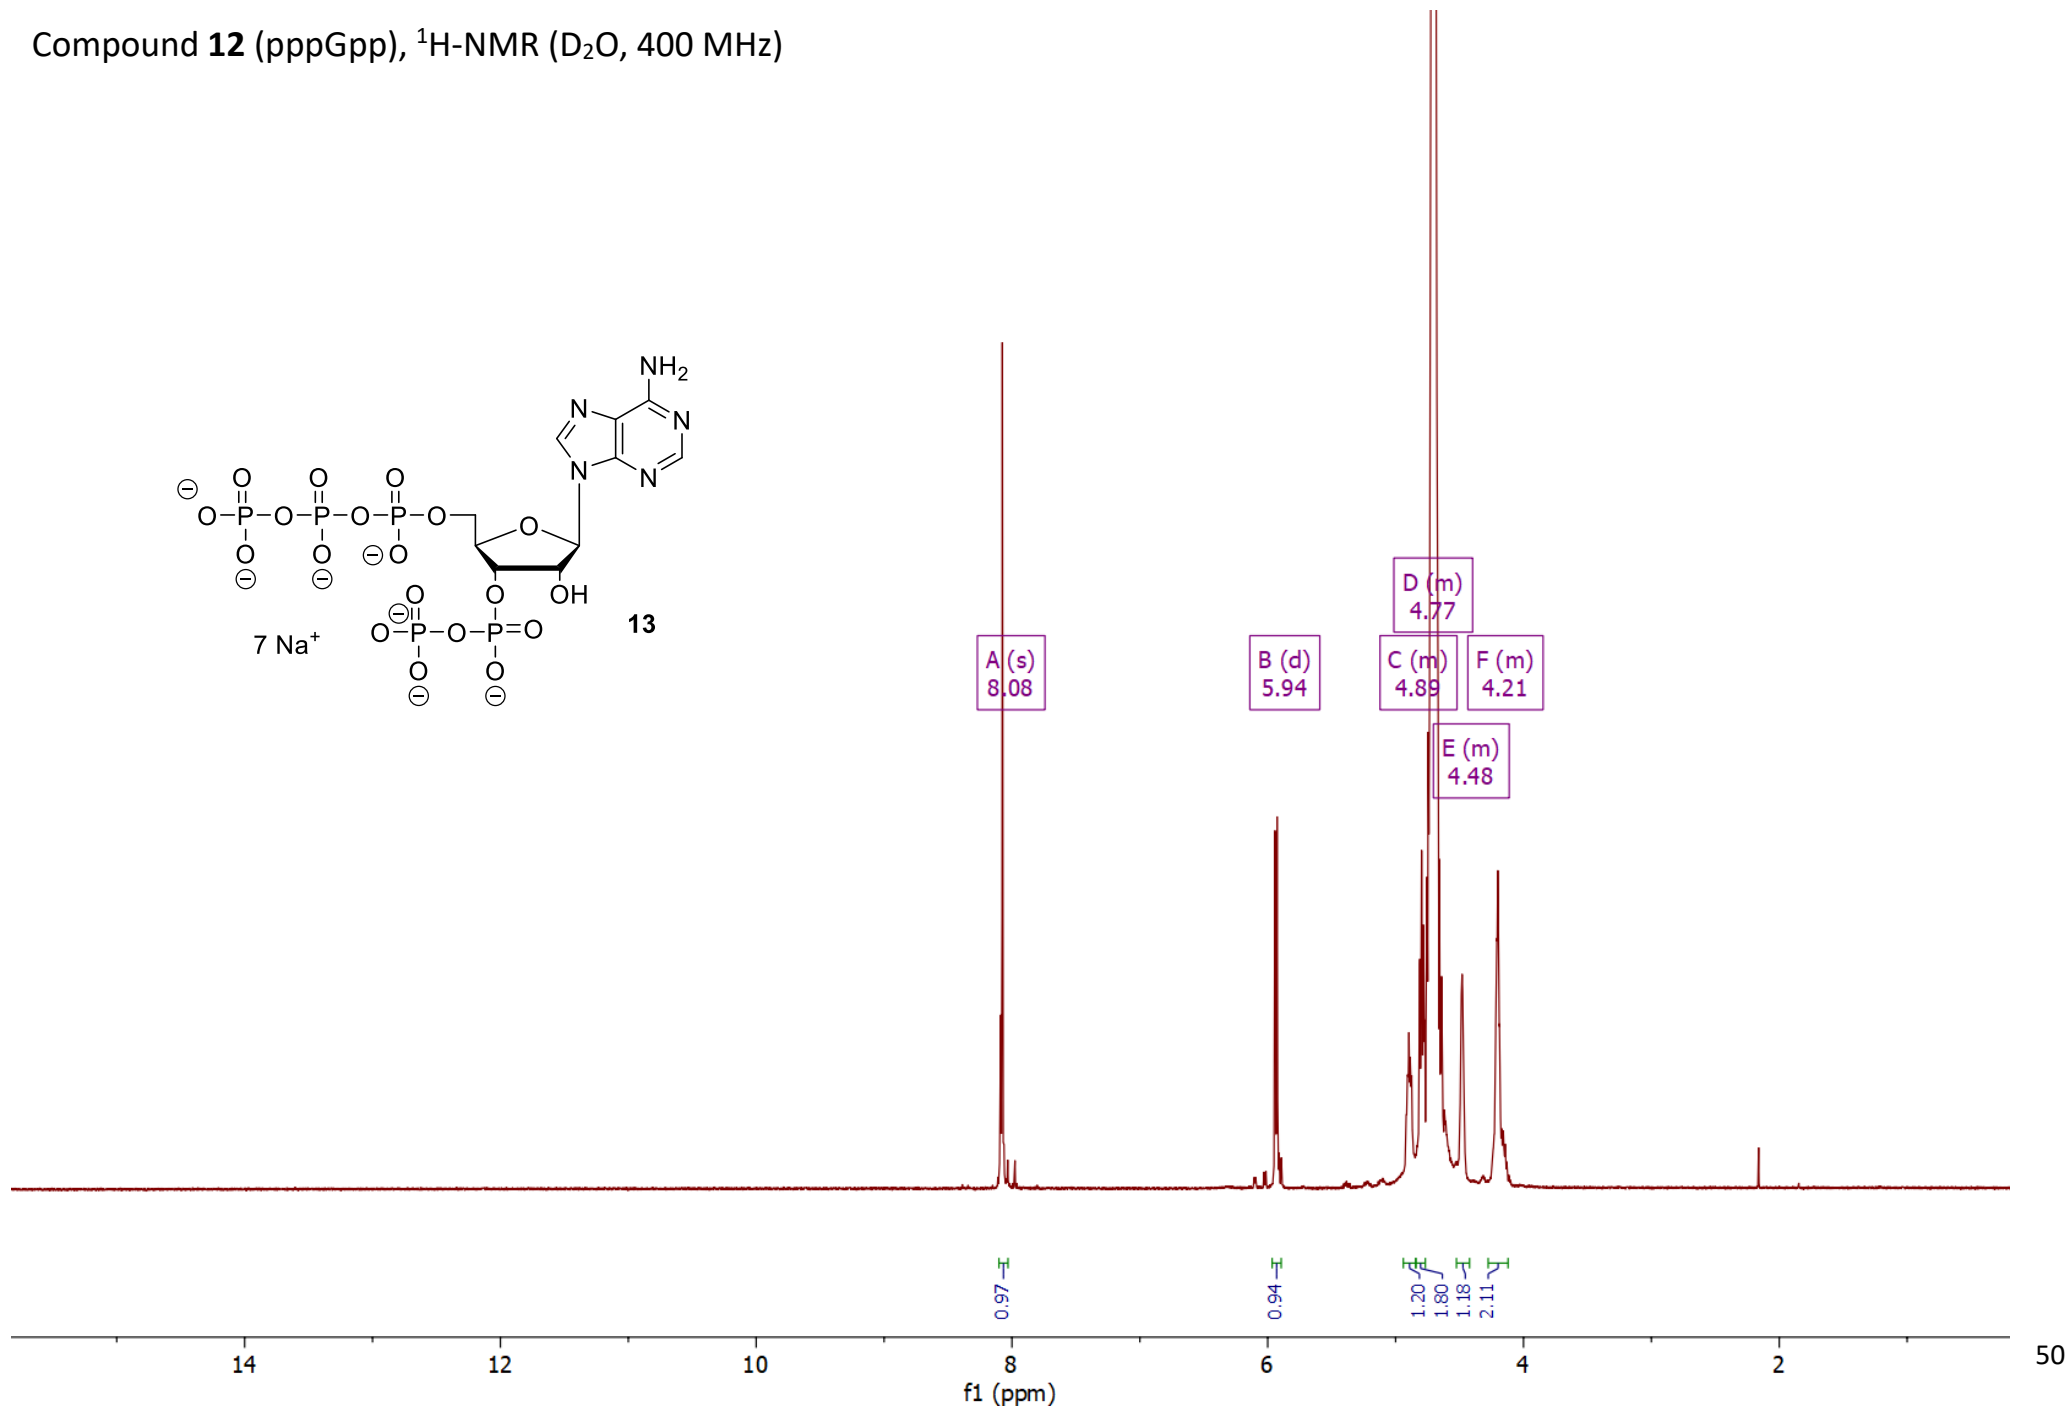

Compound **12** (pppGpp), ed-HSQC (D<sub>2</sub>O)

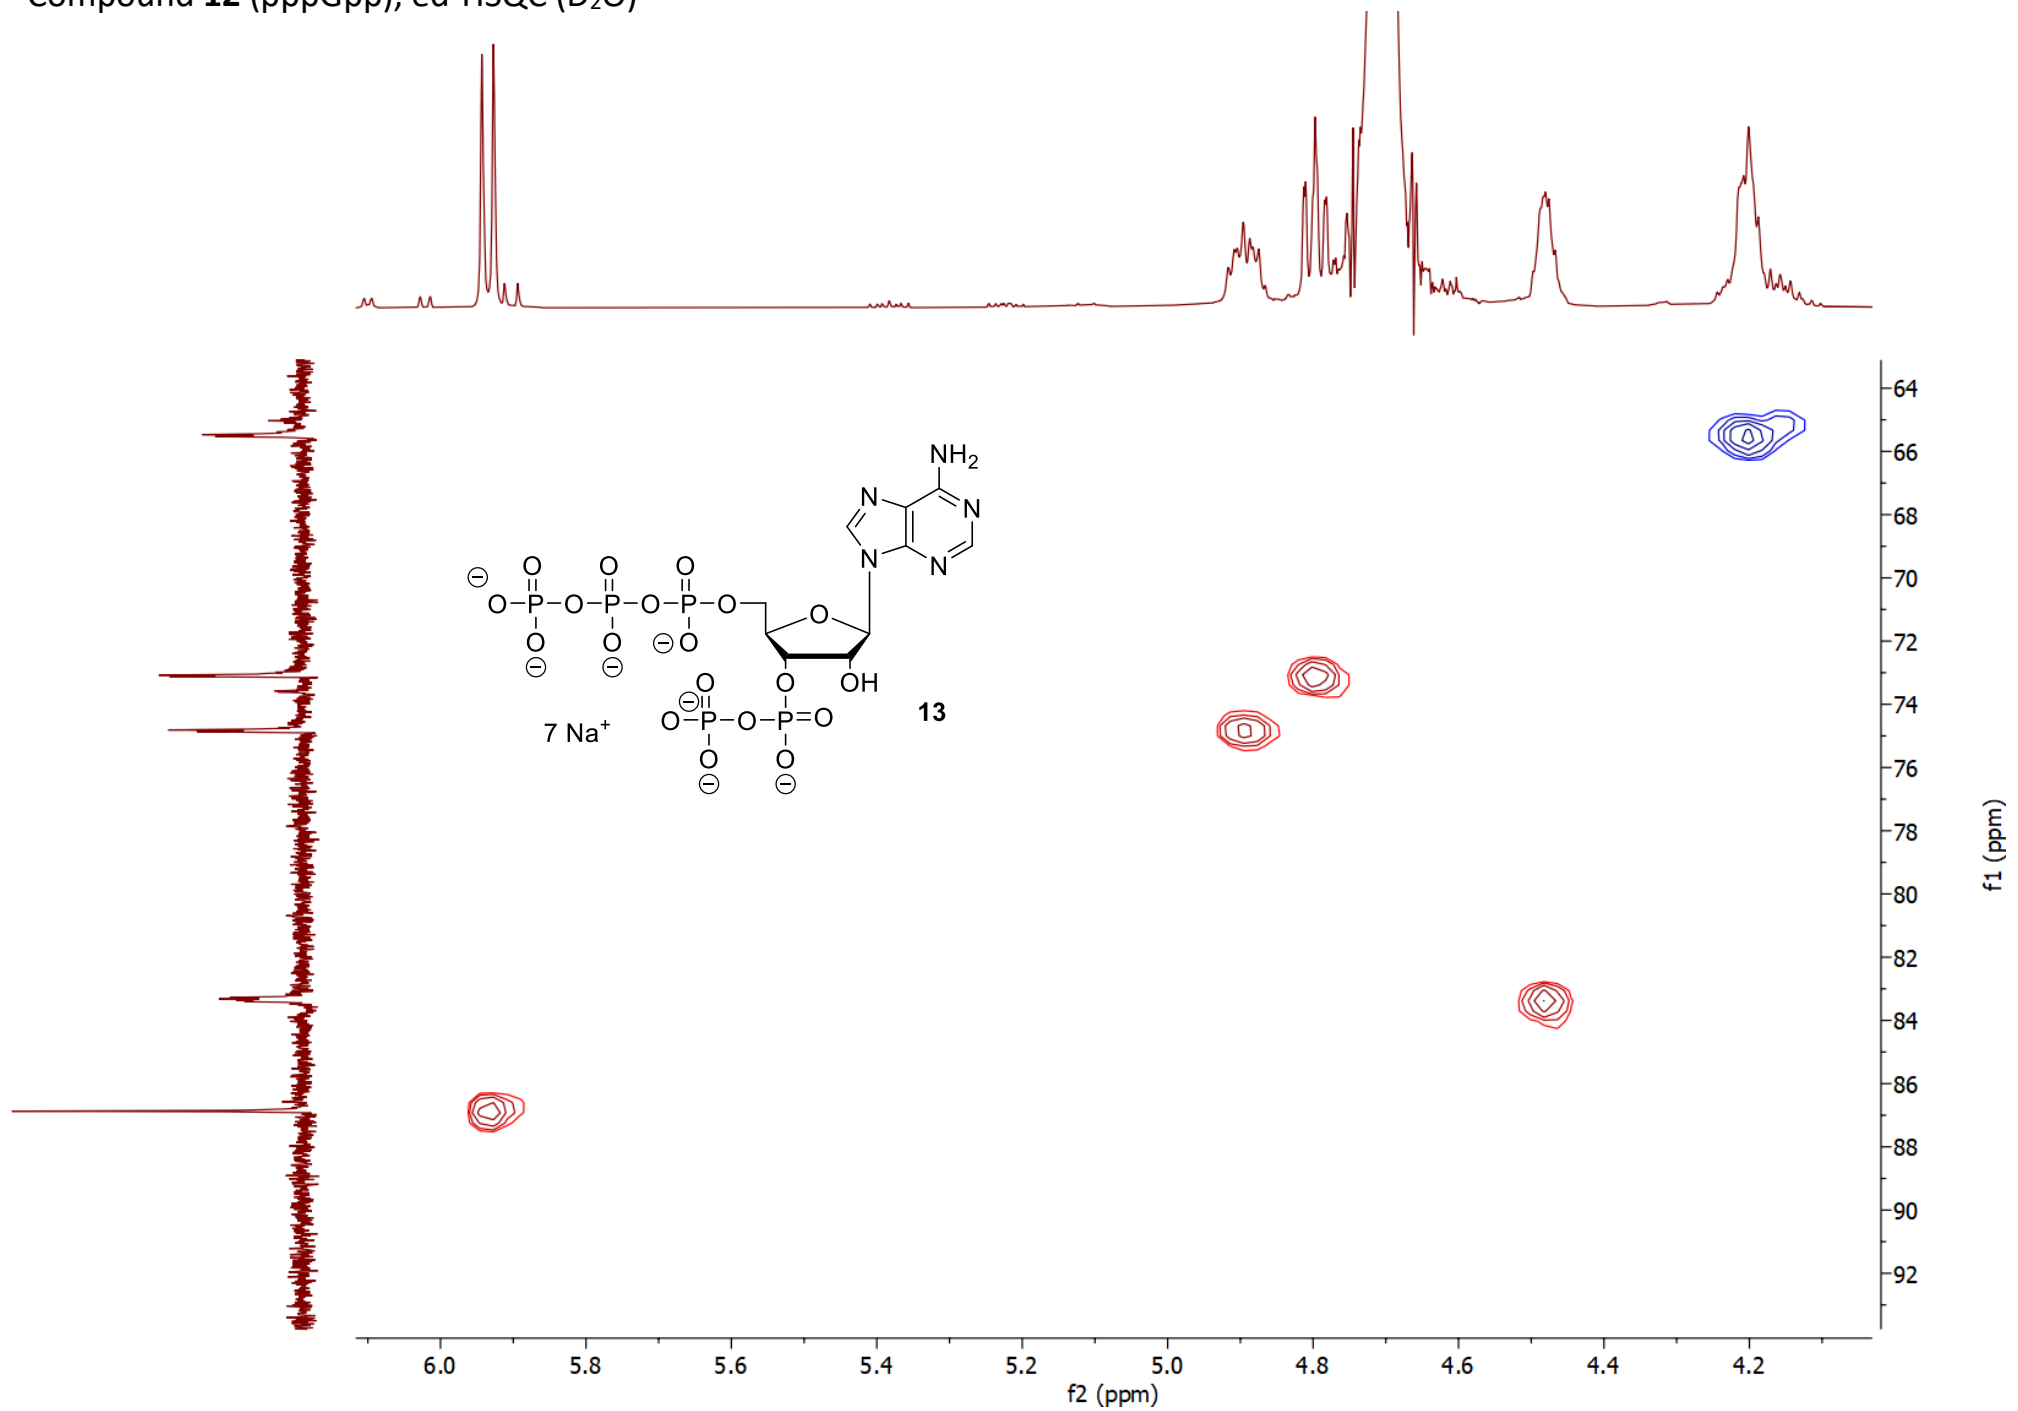

Compound **12** (pppGpp),  $^{31}\text{P}$ [ $^1\text{H}$ ]-NMR ( $\text{D}_2\text{O}$ , 162 MHz)

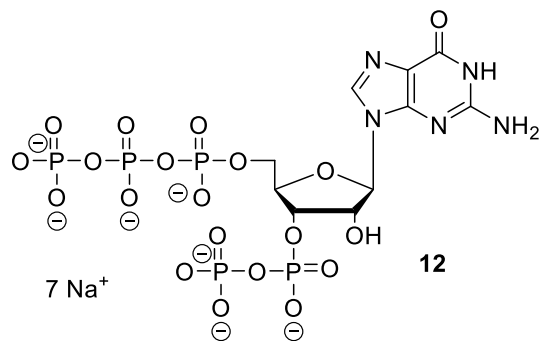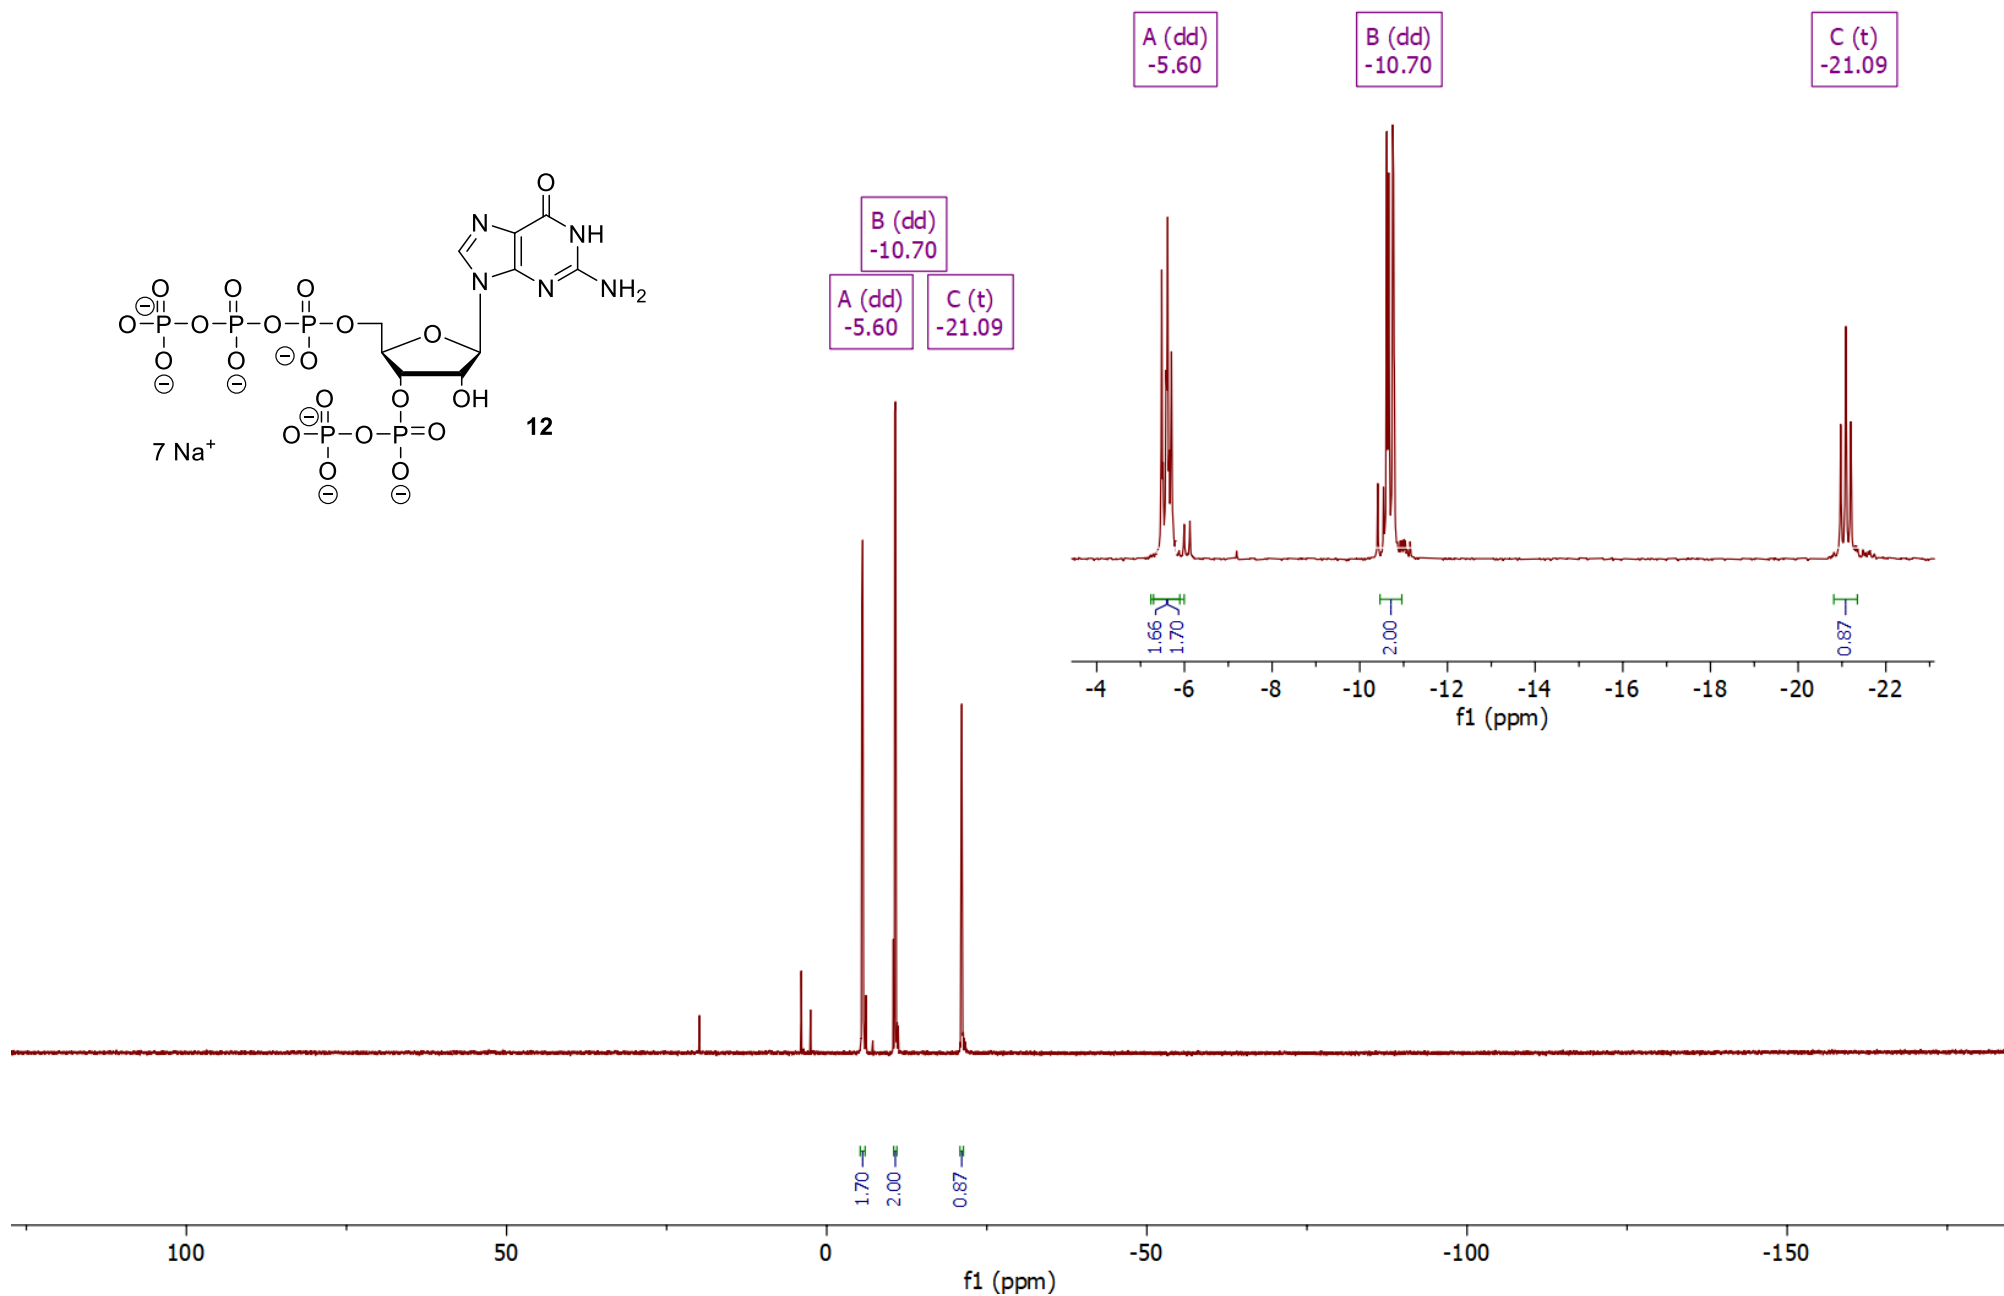

Compound **12** (pppGpp),  $^{13}\text{C}$ [ $^1\text{H}$ ]-NMR ( $\text{D}_2\text{O}$ , 101 MHz)

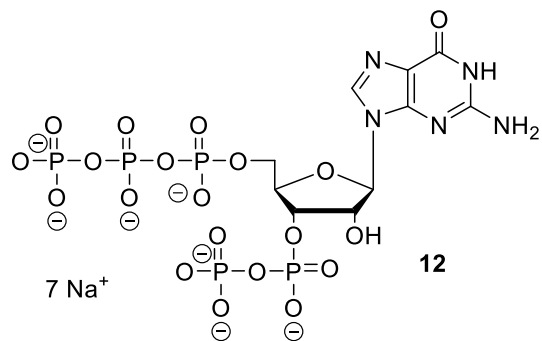

|       |        |
|-------|--------|
| E (s) | 154.04 |
| D (s) | 159.22 |
| F (s) | 151.97 |
| G (s) | 138.00 |
| H (d) | 116.34 |
| I (s) | 86.87  |
| J (s) | 83.31  |
| A (d) | 74.84  |
| B (d) | 73.10  |
| C (d) | 65.50  |

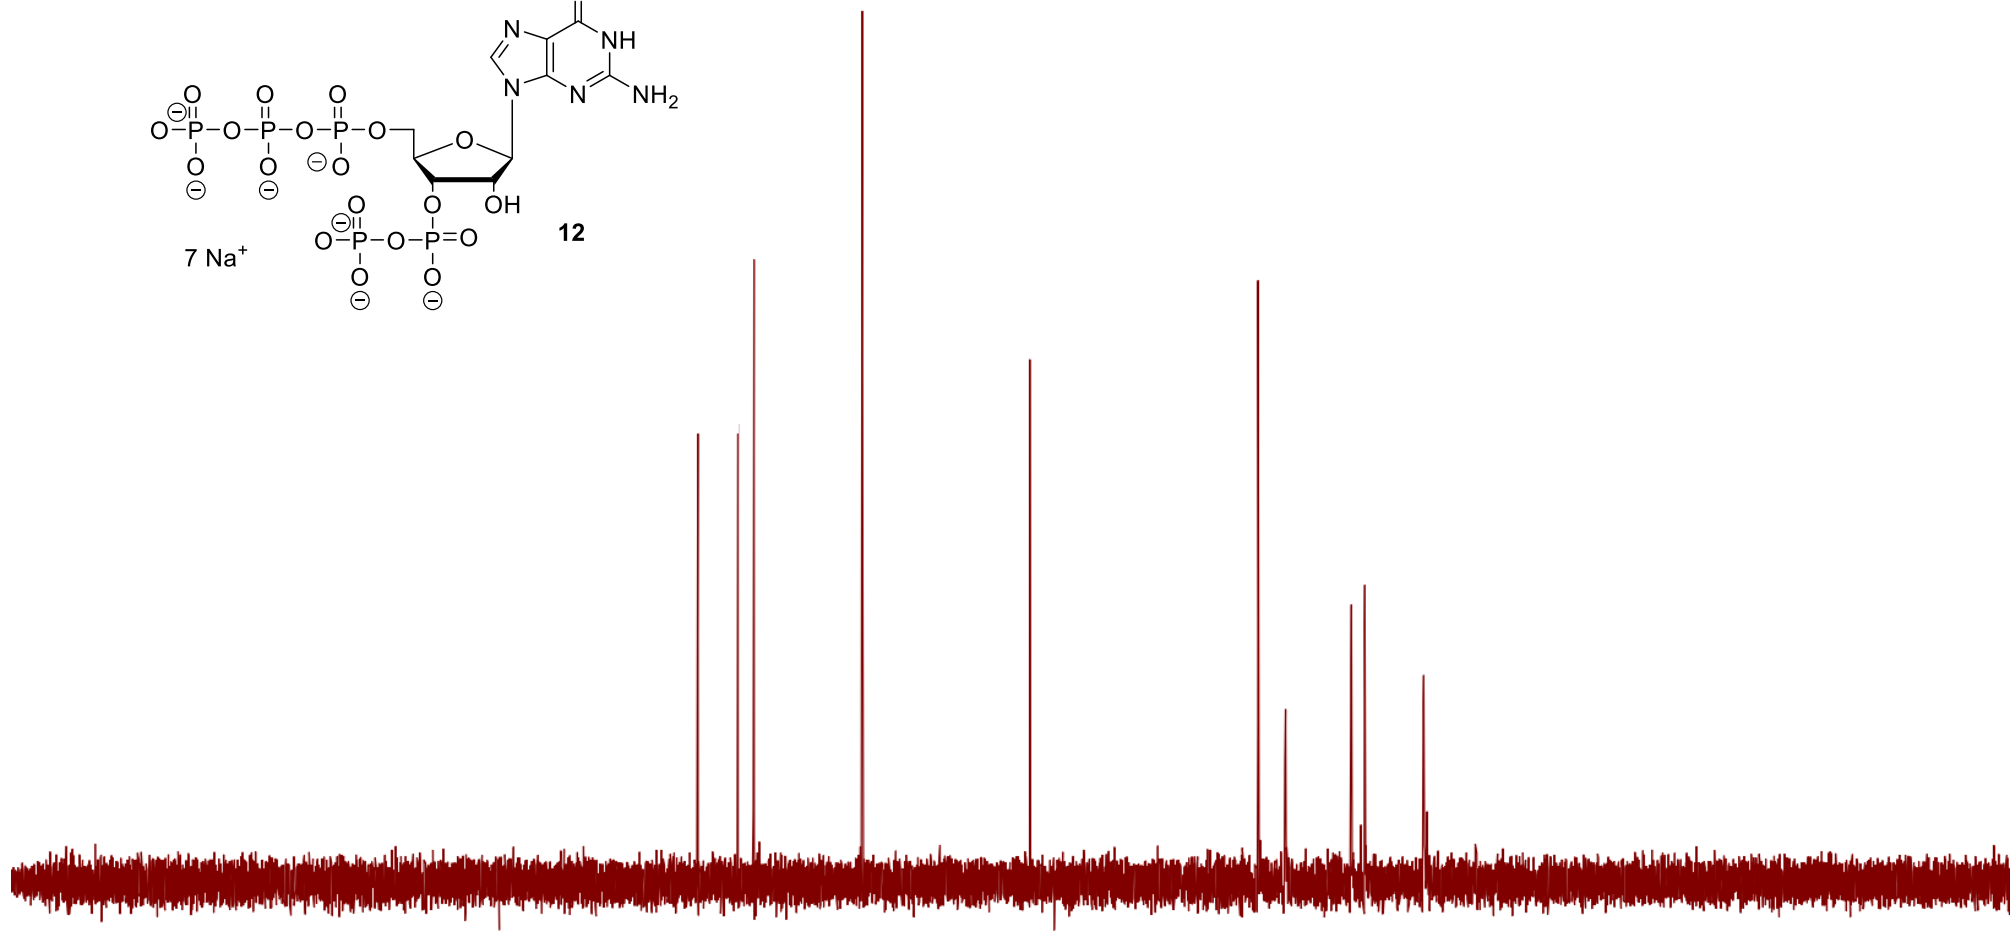

240 230 220 210 200 190 180 170 160 150 140 130 120 110 100 90 80 70 60 50 40 30 20 10 0 -1 53

f1 (ppm)

Compound **16** (pentinyl-pppAp),  $^1\text{H-NMR}$  ( $\text{D}_2\text{O}$ , 400 MHz)

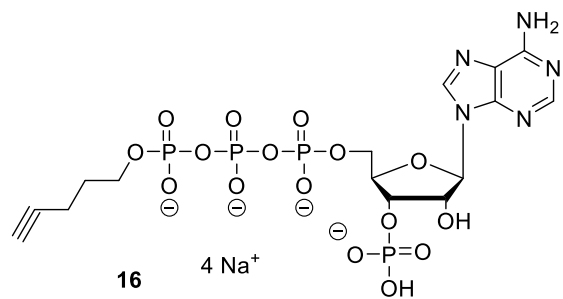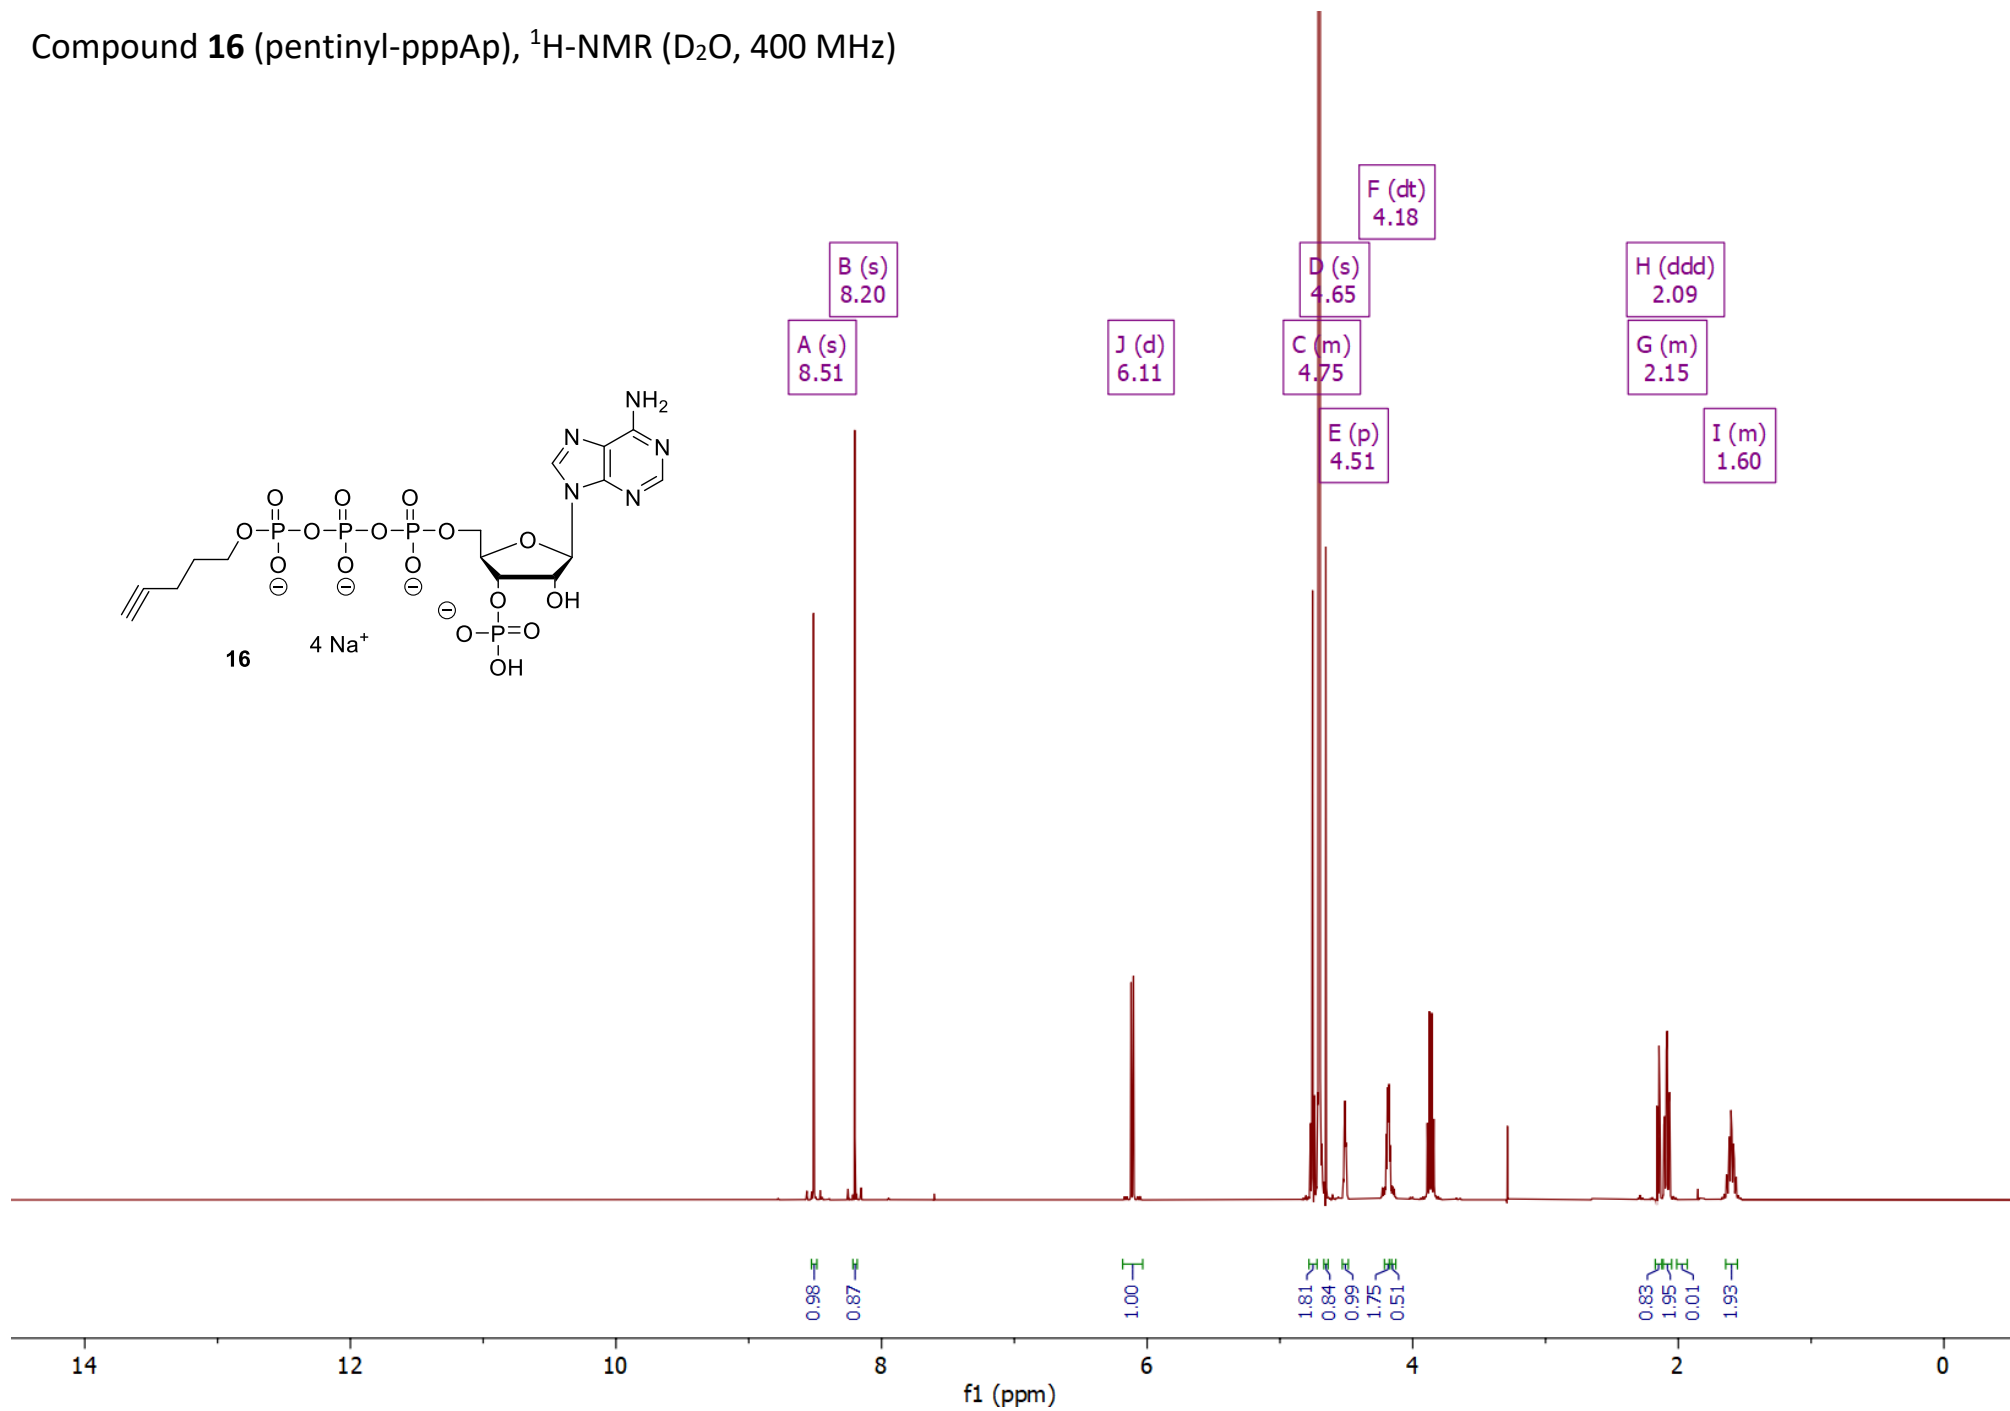

Compound **16** (pppApp),  $^{31}\text{P}$ [ $^1\text{H}$ ]-NMR ( $\text{D}_2\text{O}$ , 162 MHz)

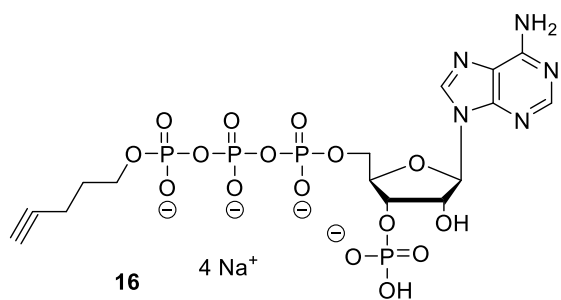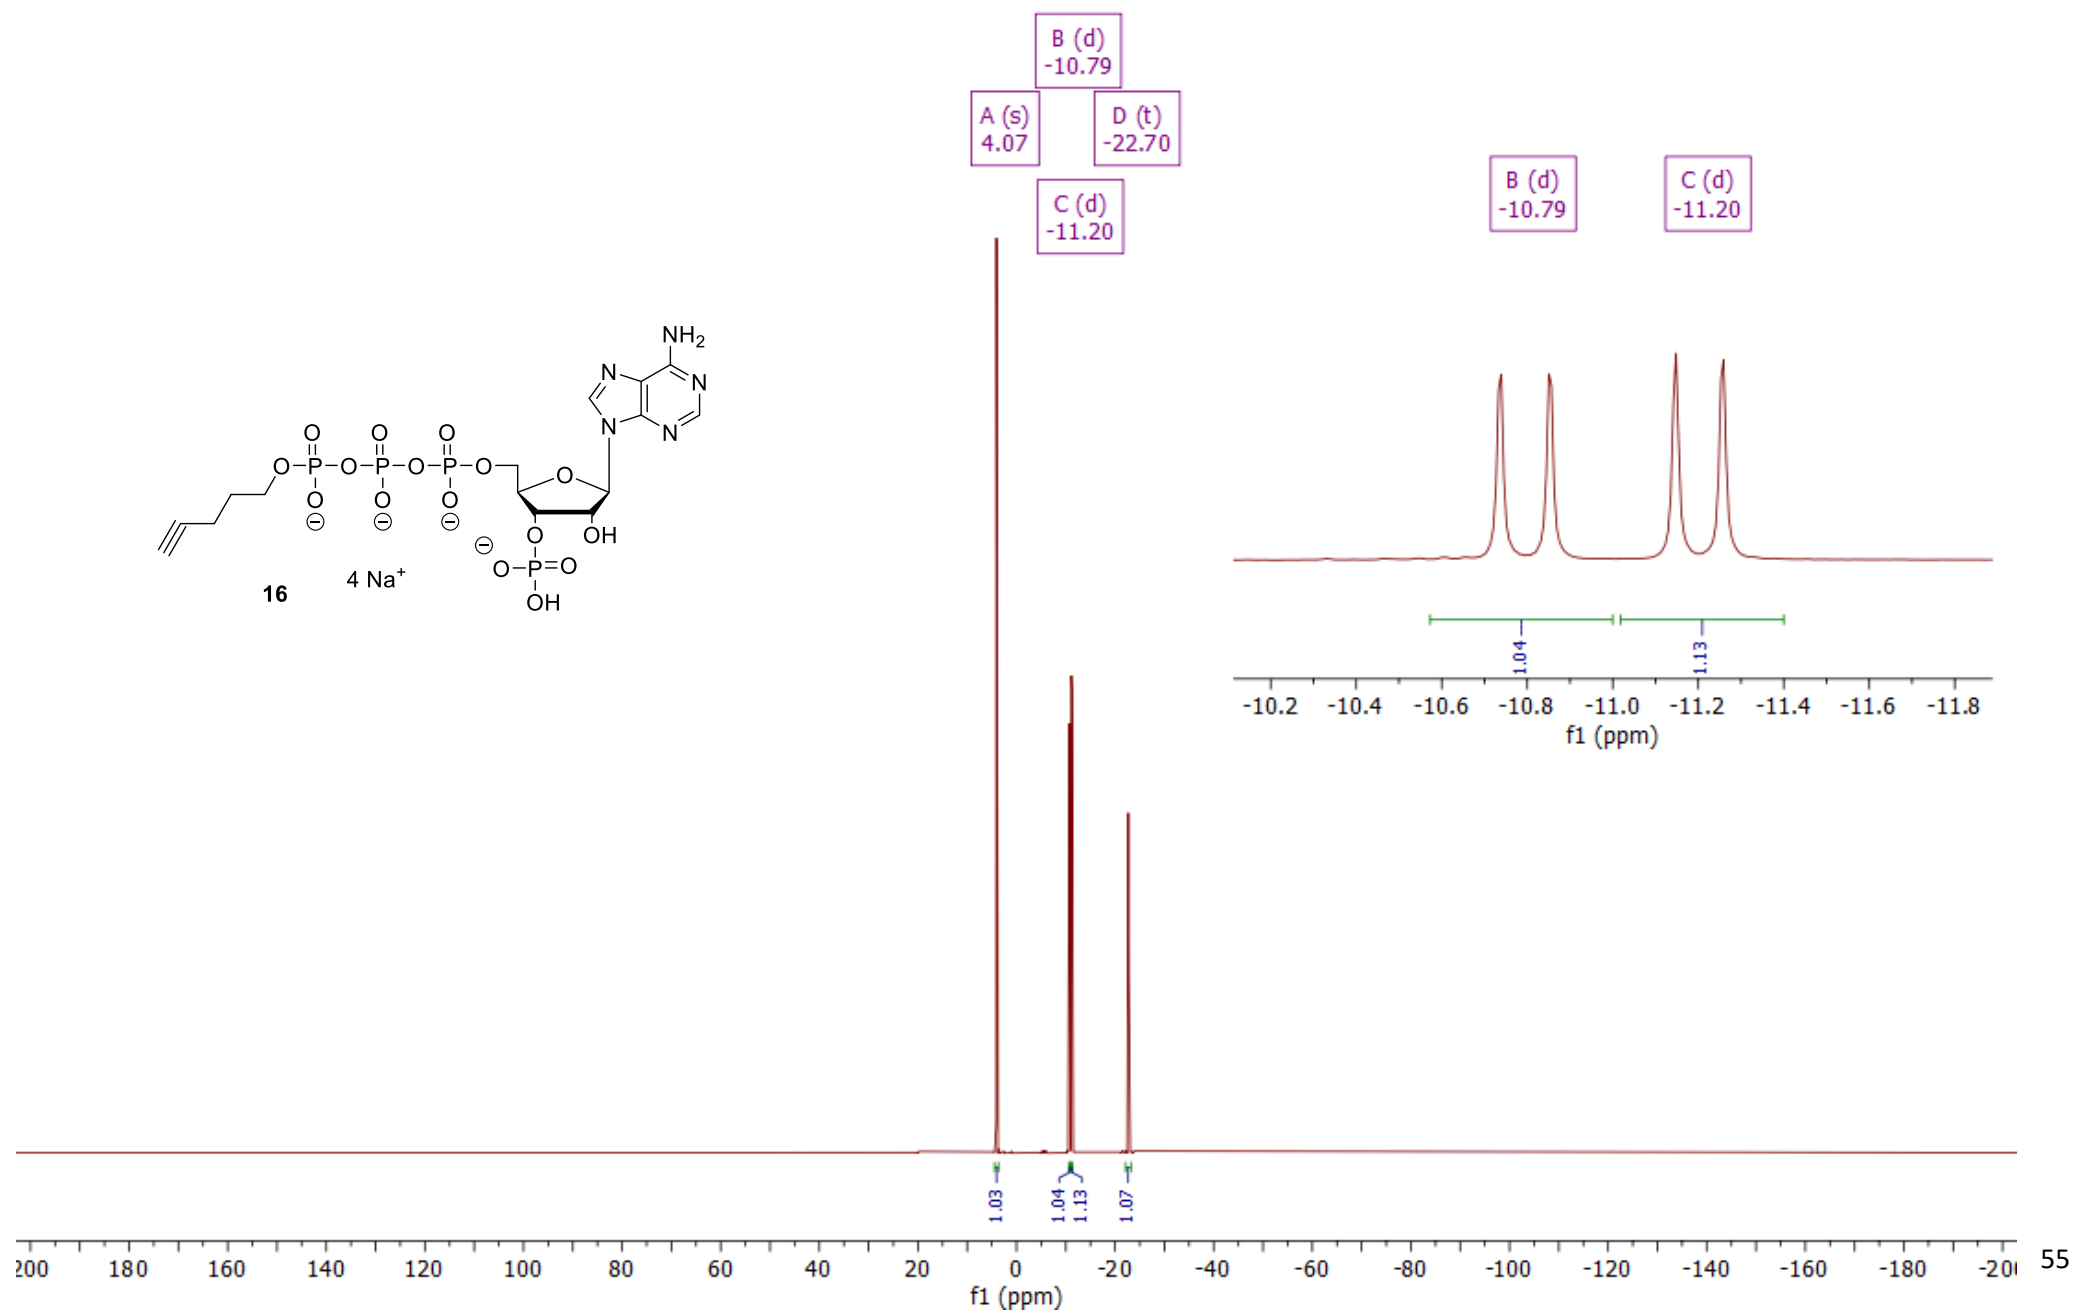

Compound **16** (pppAp),  $^{31}\text{P}$ -NMR ( $\text{D}_2\text{O}$ , 162 MHz)

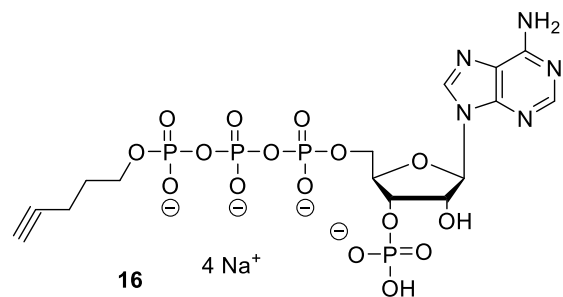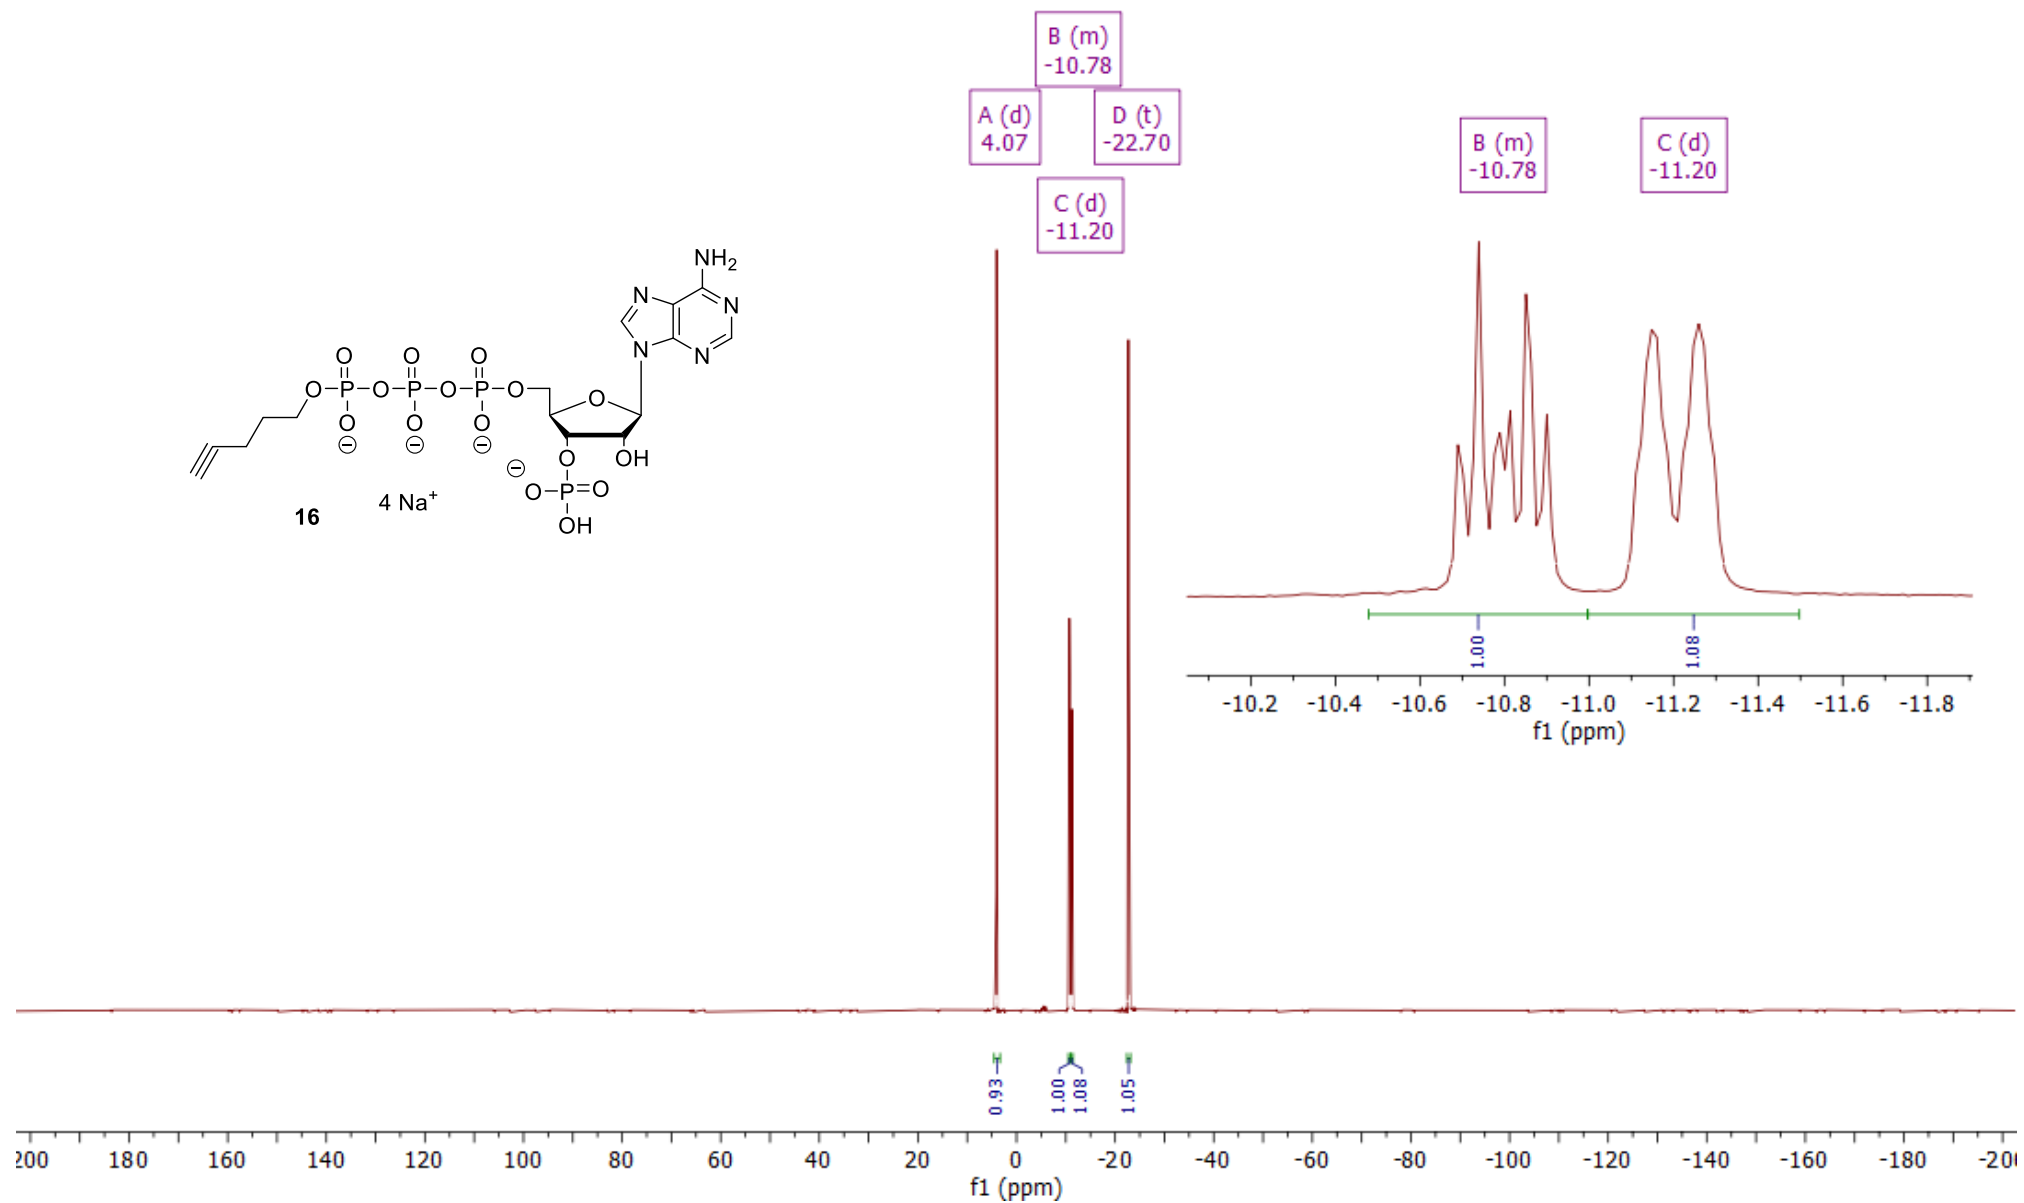

Compound **16** (pentinyl-pppAp),  $^{13}\text{C}$ [ $^1\text{H}$ ]-NMR ( $\text{D}_2\text{O}$ , 101 MHz)

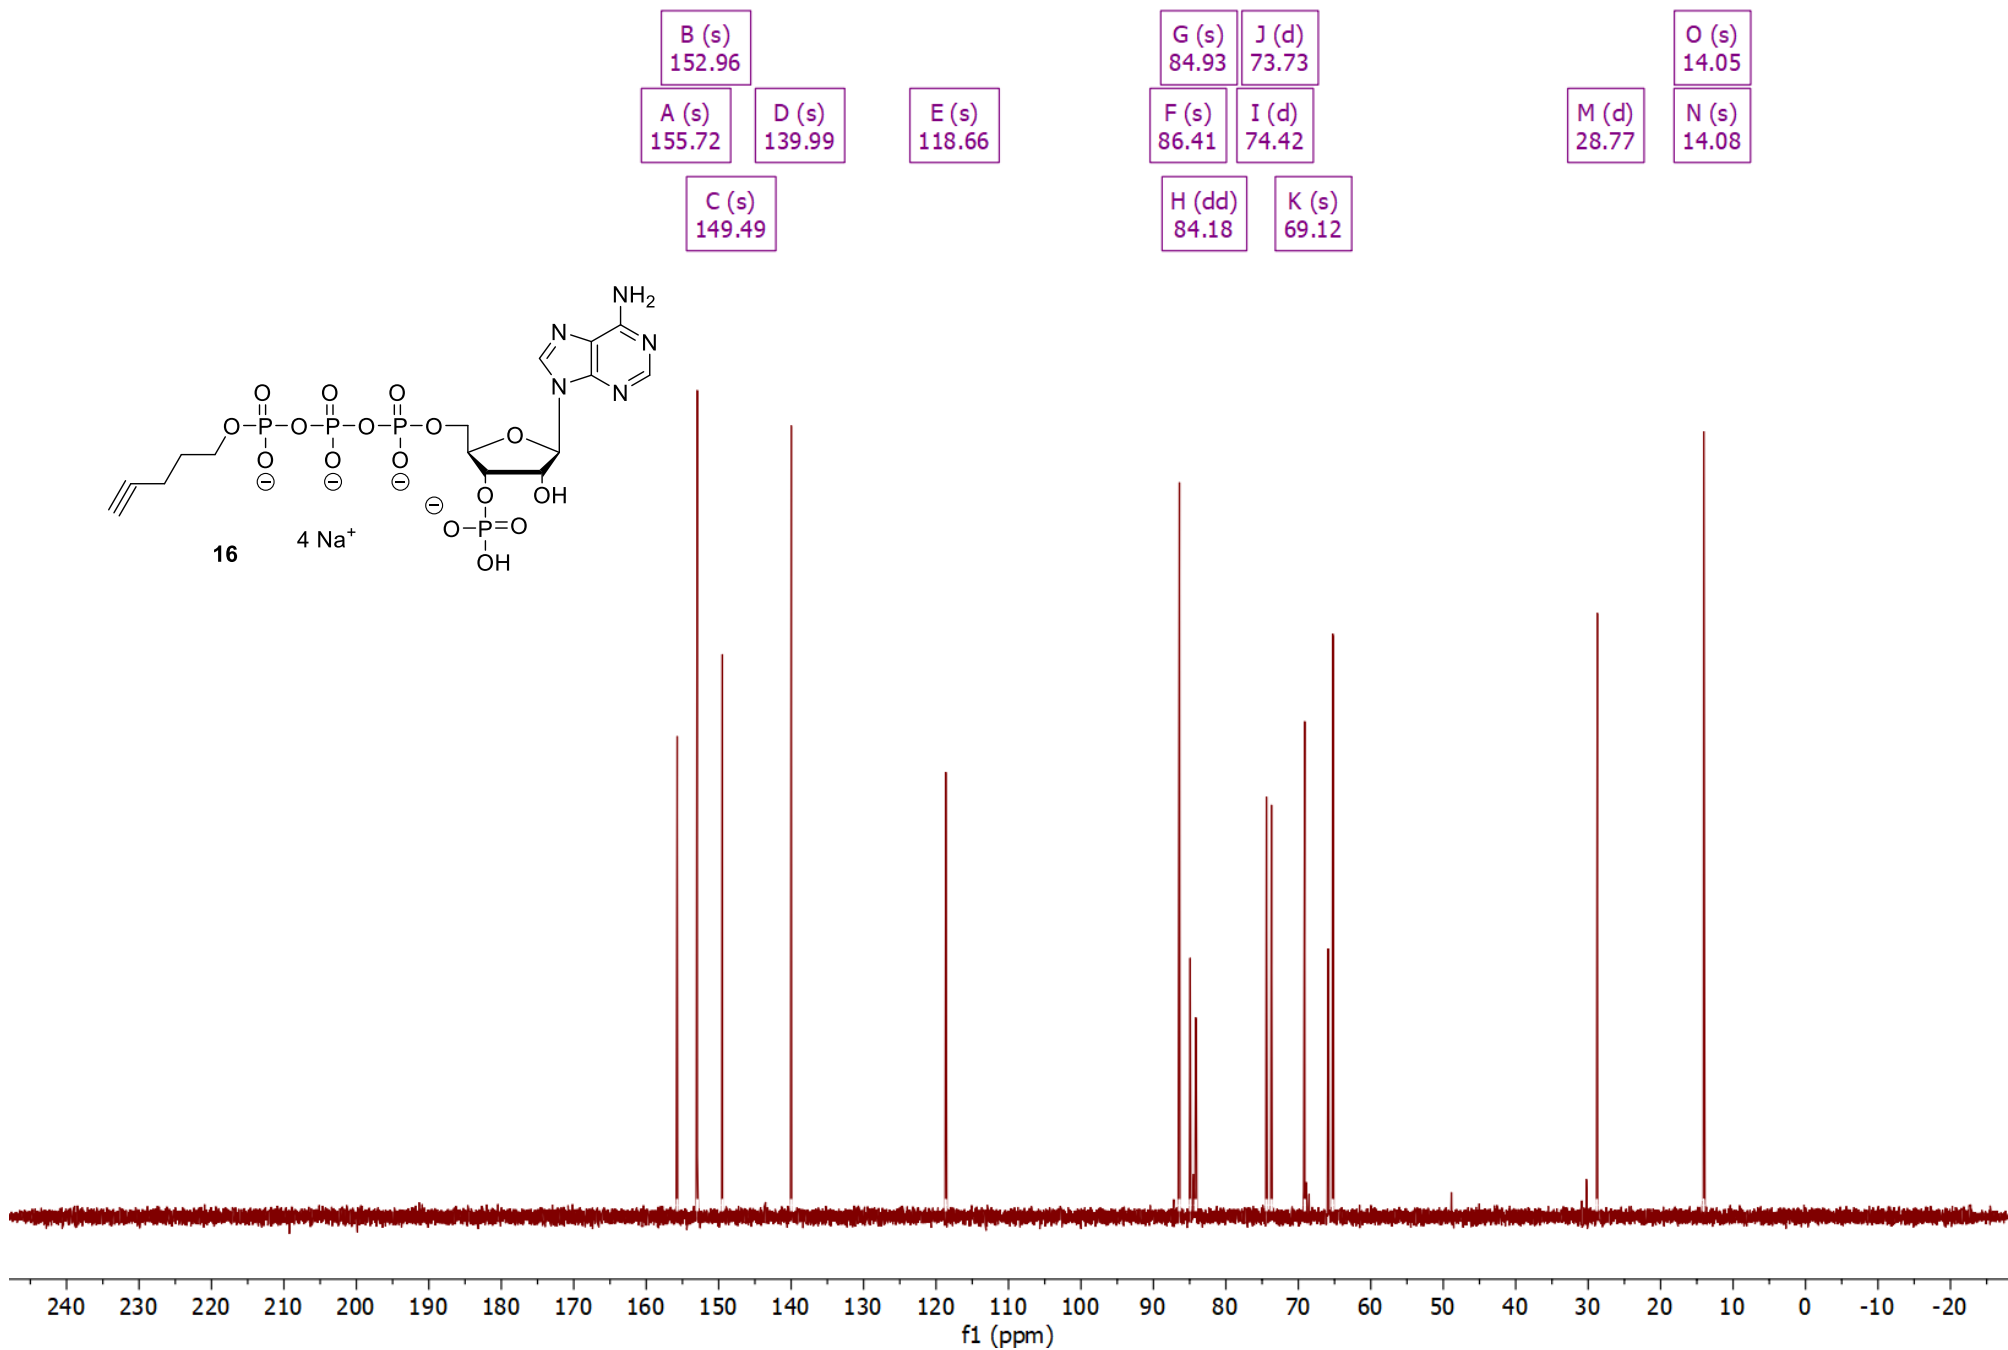

Compound **16** (pentynyl-pppAp),  $^{13}\text{C}$ [ $^1\text{H}$ ]-NMR ( $\text{D}_2\text{O}$ , 101 MHz), detailed

G (s)  
84.93

H (dd)  
84.18

I (d)  
74.42

J (d)  
73.73

K (s)  
69.12

L (d)  
65.22

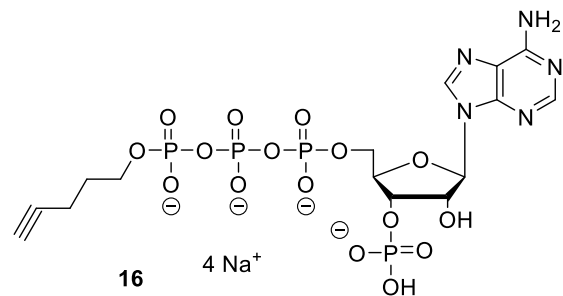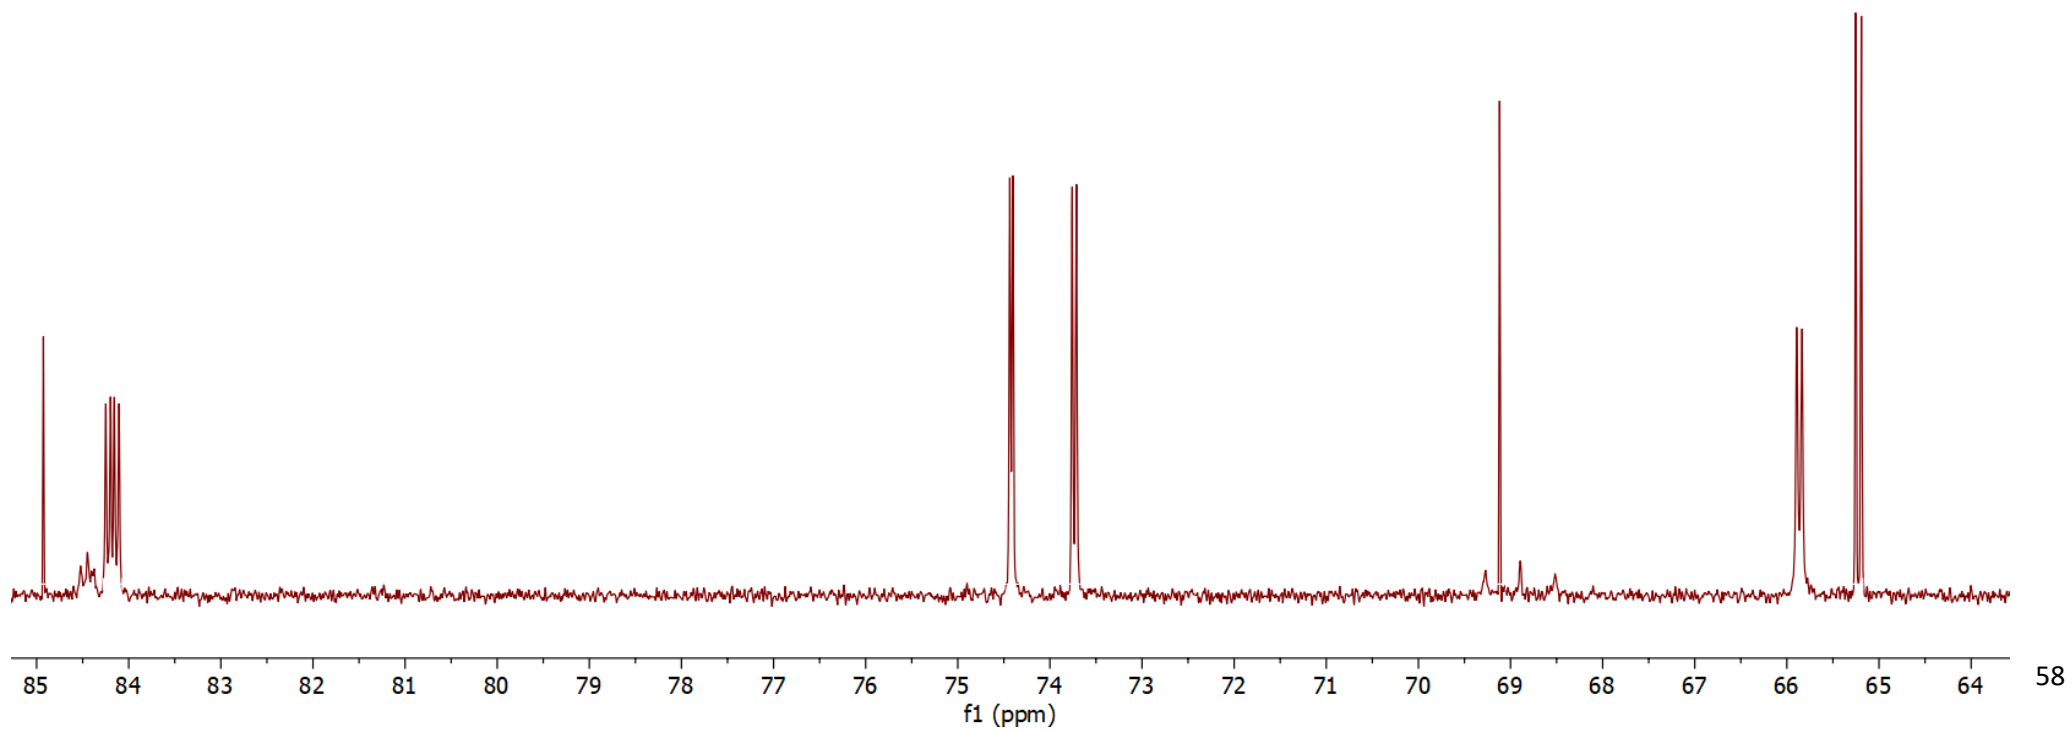

Compound **17** (pentinyl-pppApp),  $^1\text{H-NMR}$  ( $\text{D}_2\text{O}$ , 400 MHz)

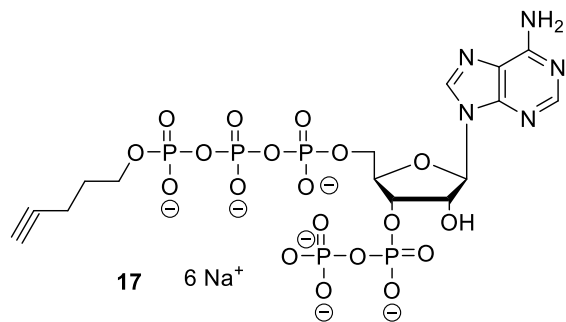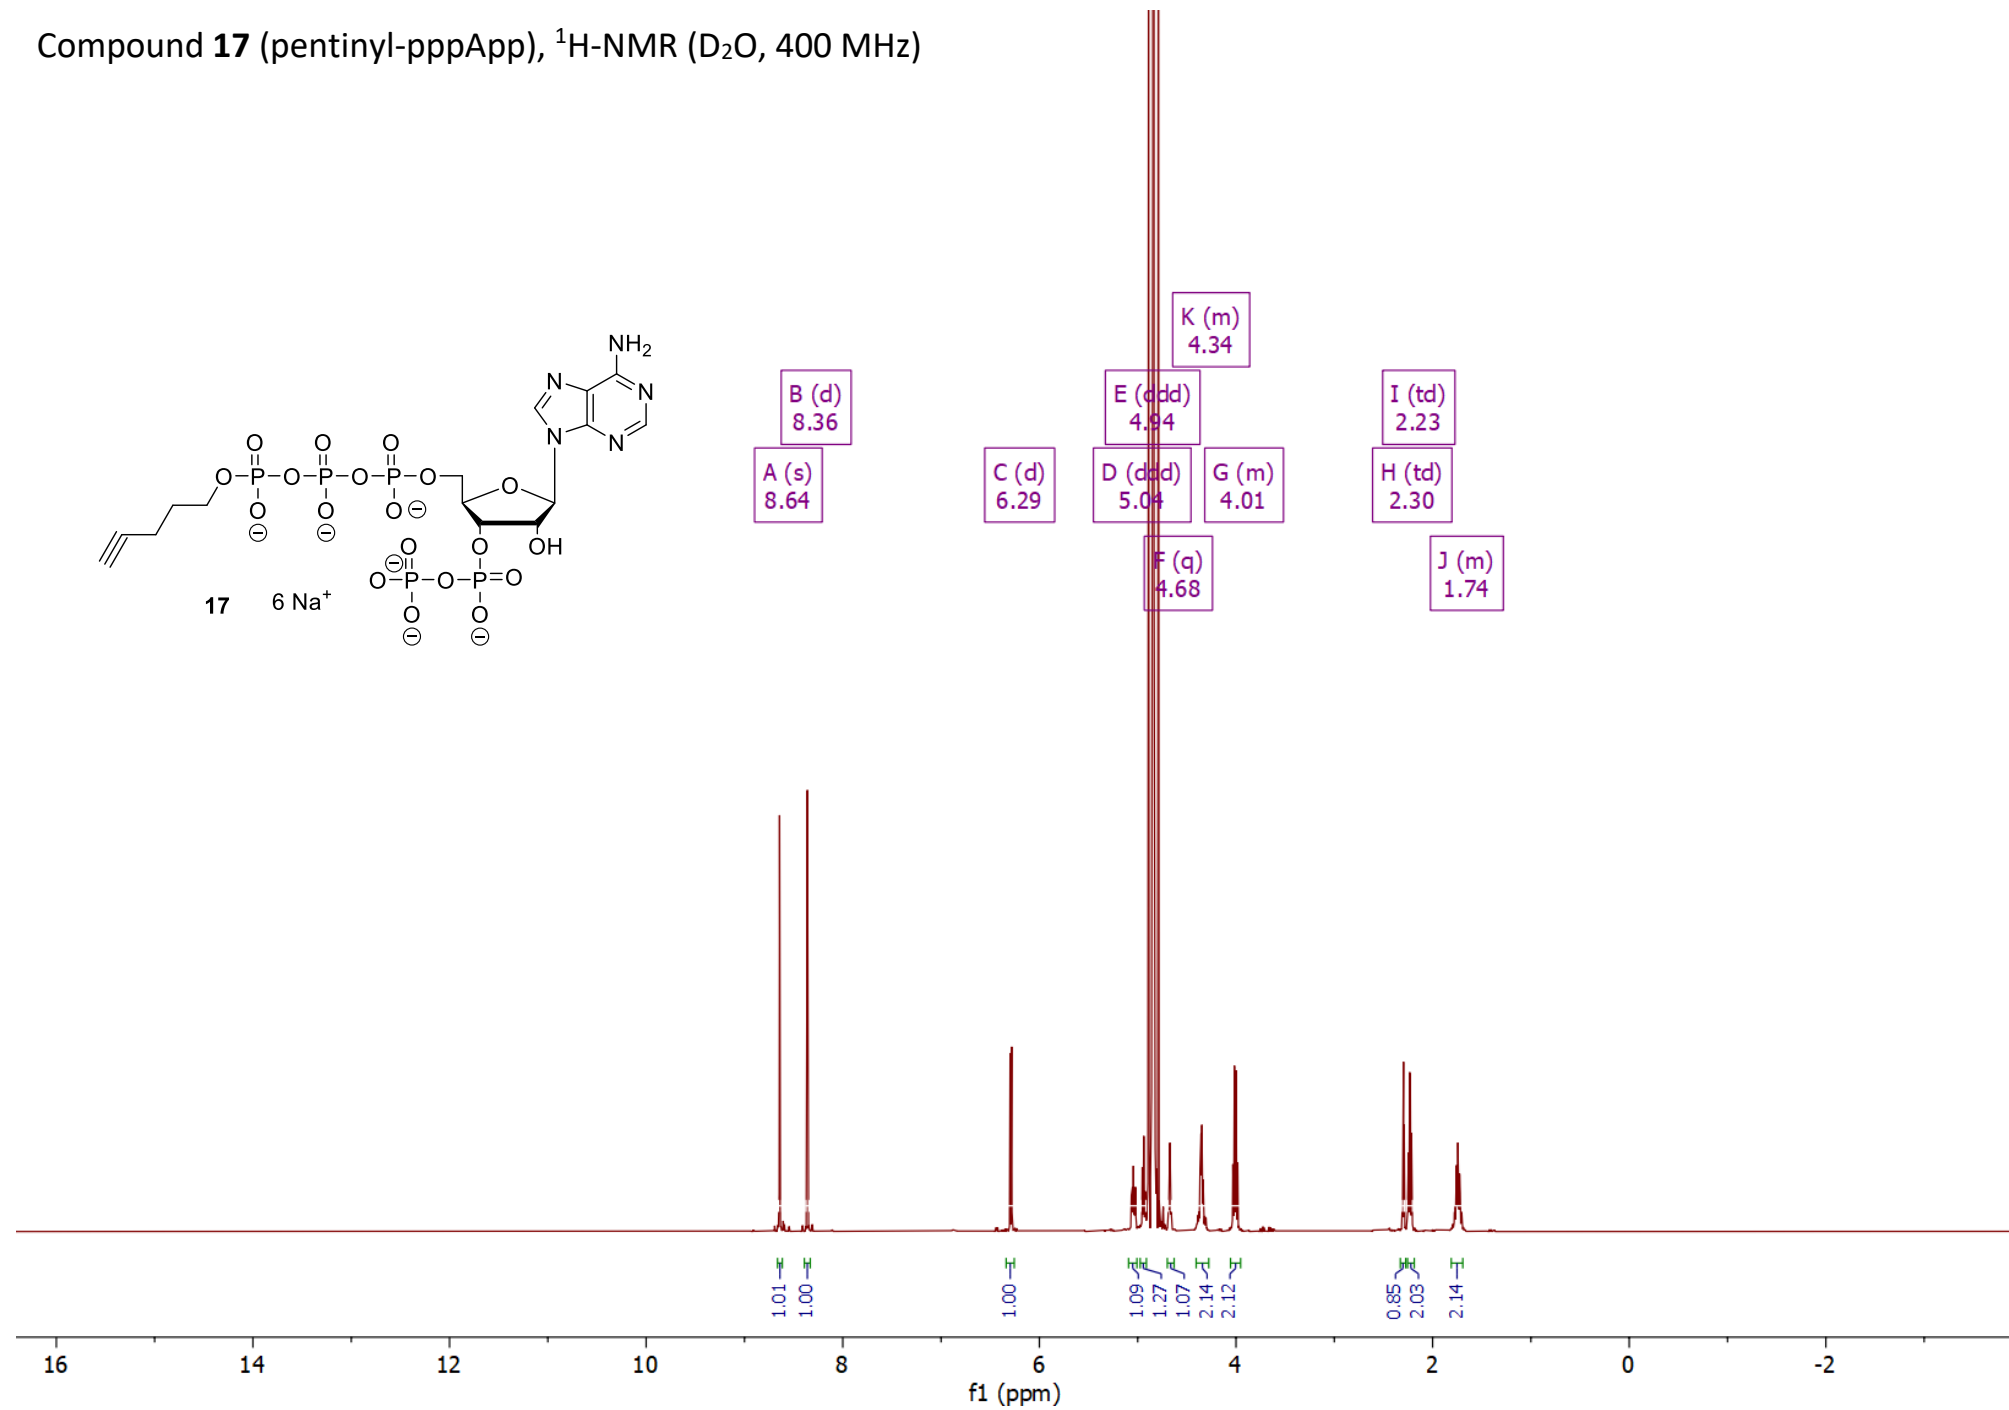

Compound **17** (pentynyl-pppApp),  $^{31}\text{P}\{^1\text{H}\}$ -NMR ( $\text{D}_2\text{O}$ , 162 MHz)

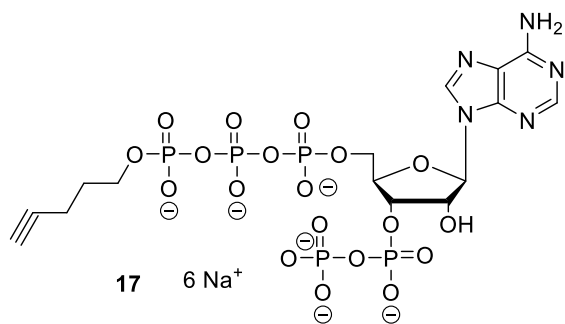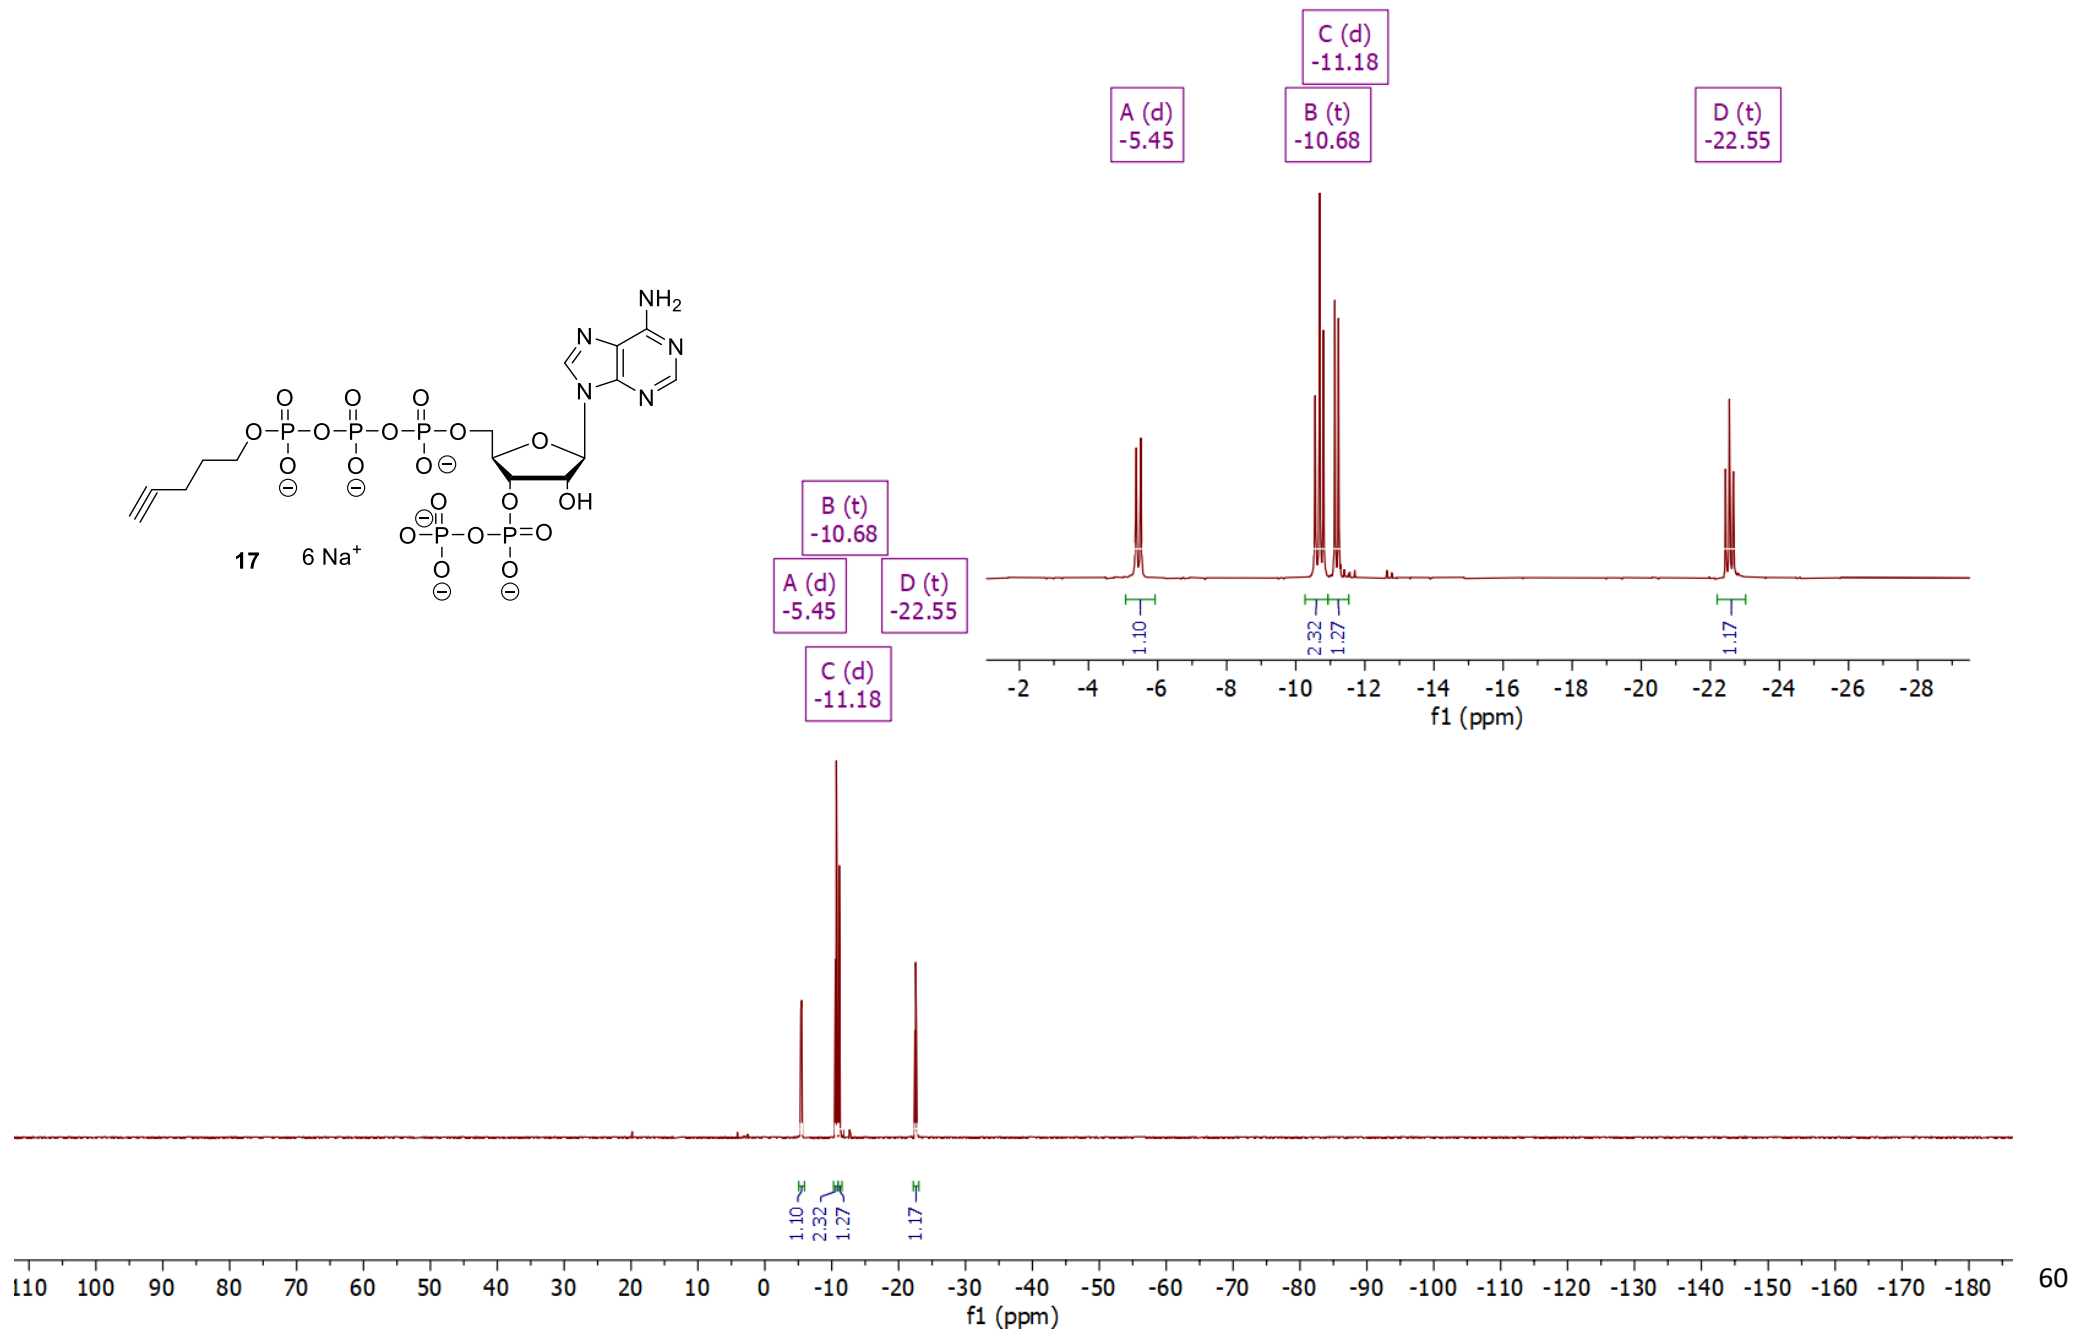

Compound **17** (pentynyl-pppApp),  $^{13}\text{C}$ [ $^1\text{H}$ ]-NMR ( $\text{D}_2\text{O}$ , 101 MHz)

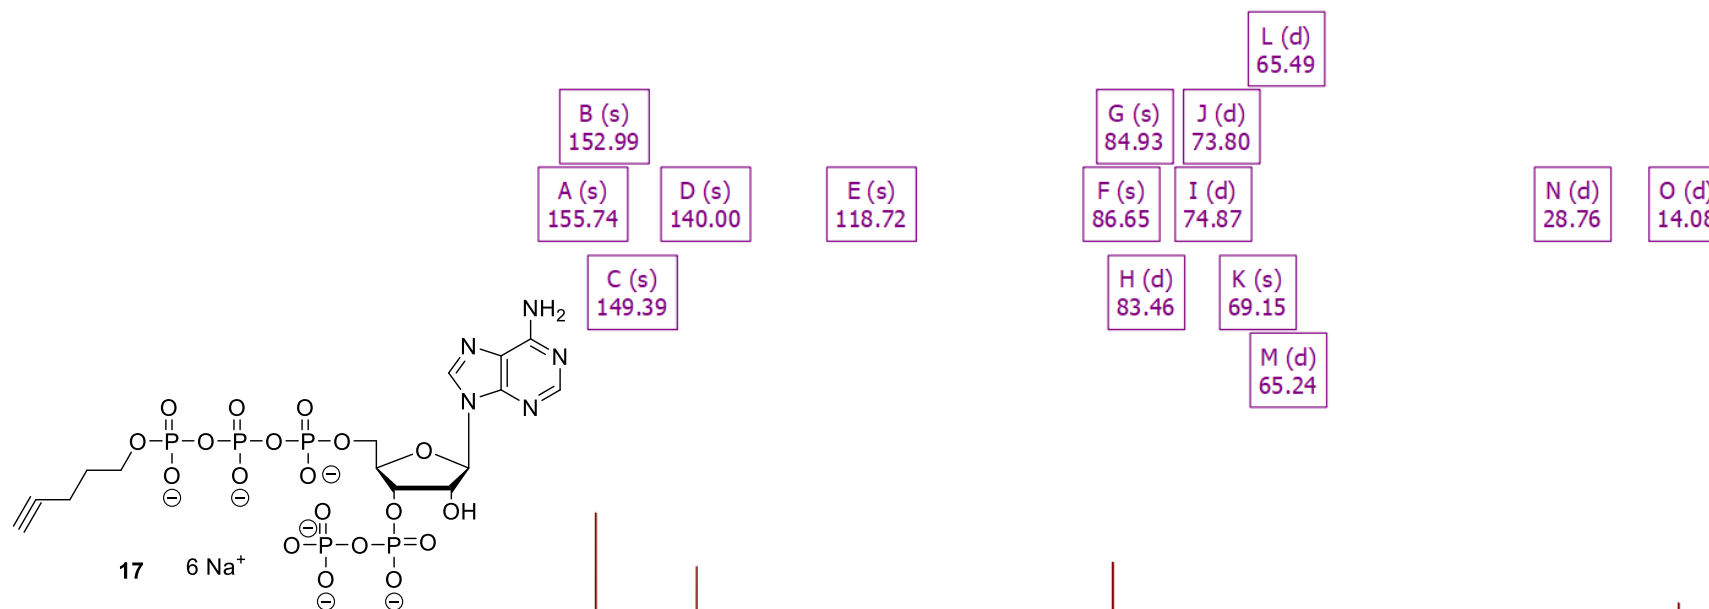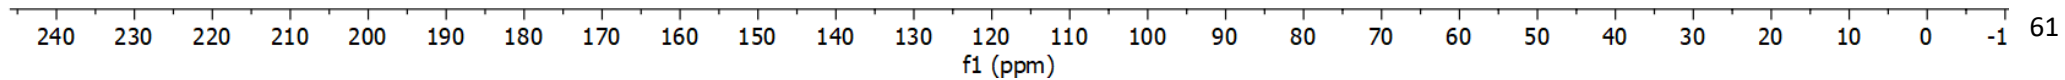

Compound **18** (amino-pppApp), <sup>1</sup>H-NMR (D<sub>2</sub>O, 400 MHz)

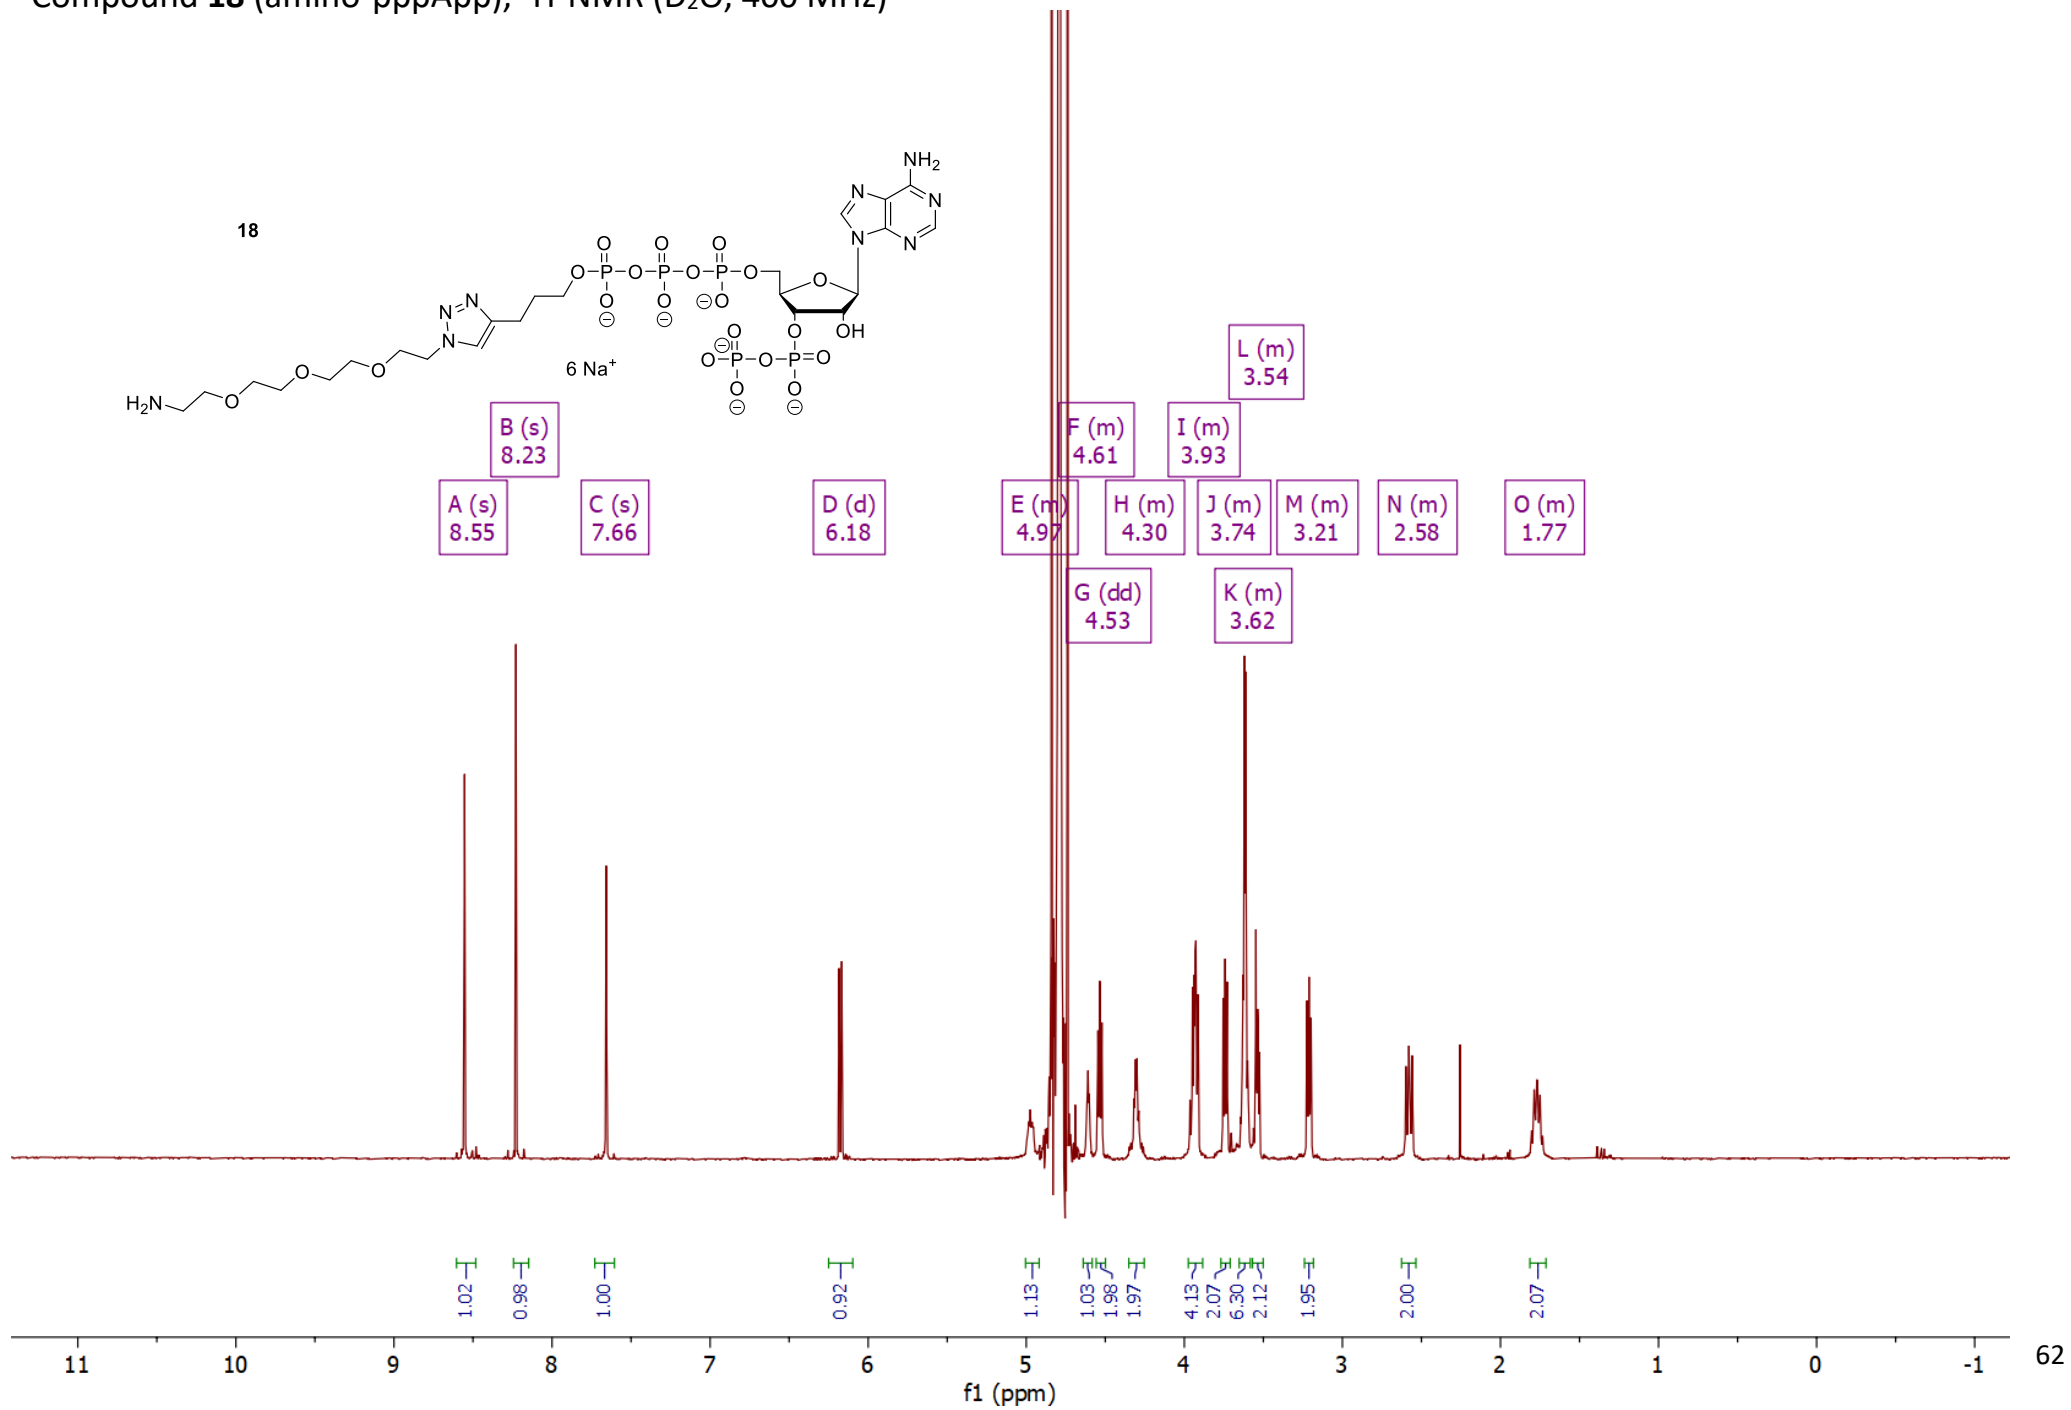

Compound **18** (amino-pppApp),  $^{31}\text{P}$ [ $^1\text{H}$ ]-NMR ( $\text{D}_2\text{O}$ , 162 MHz)

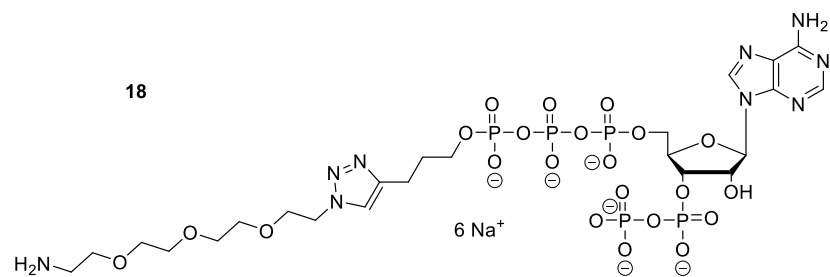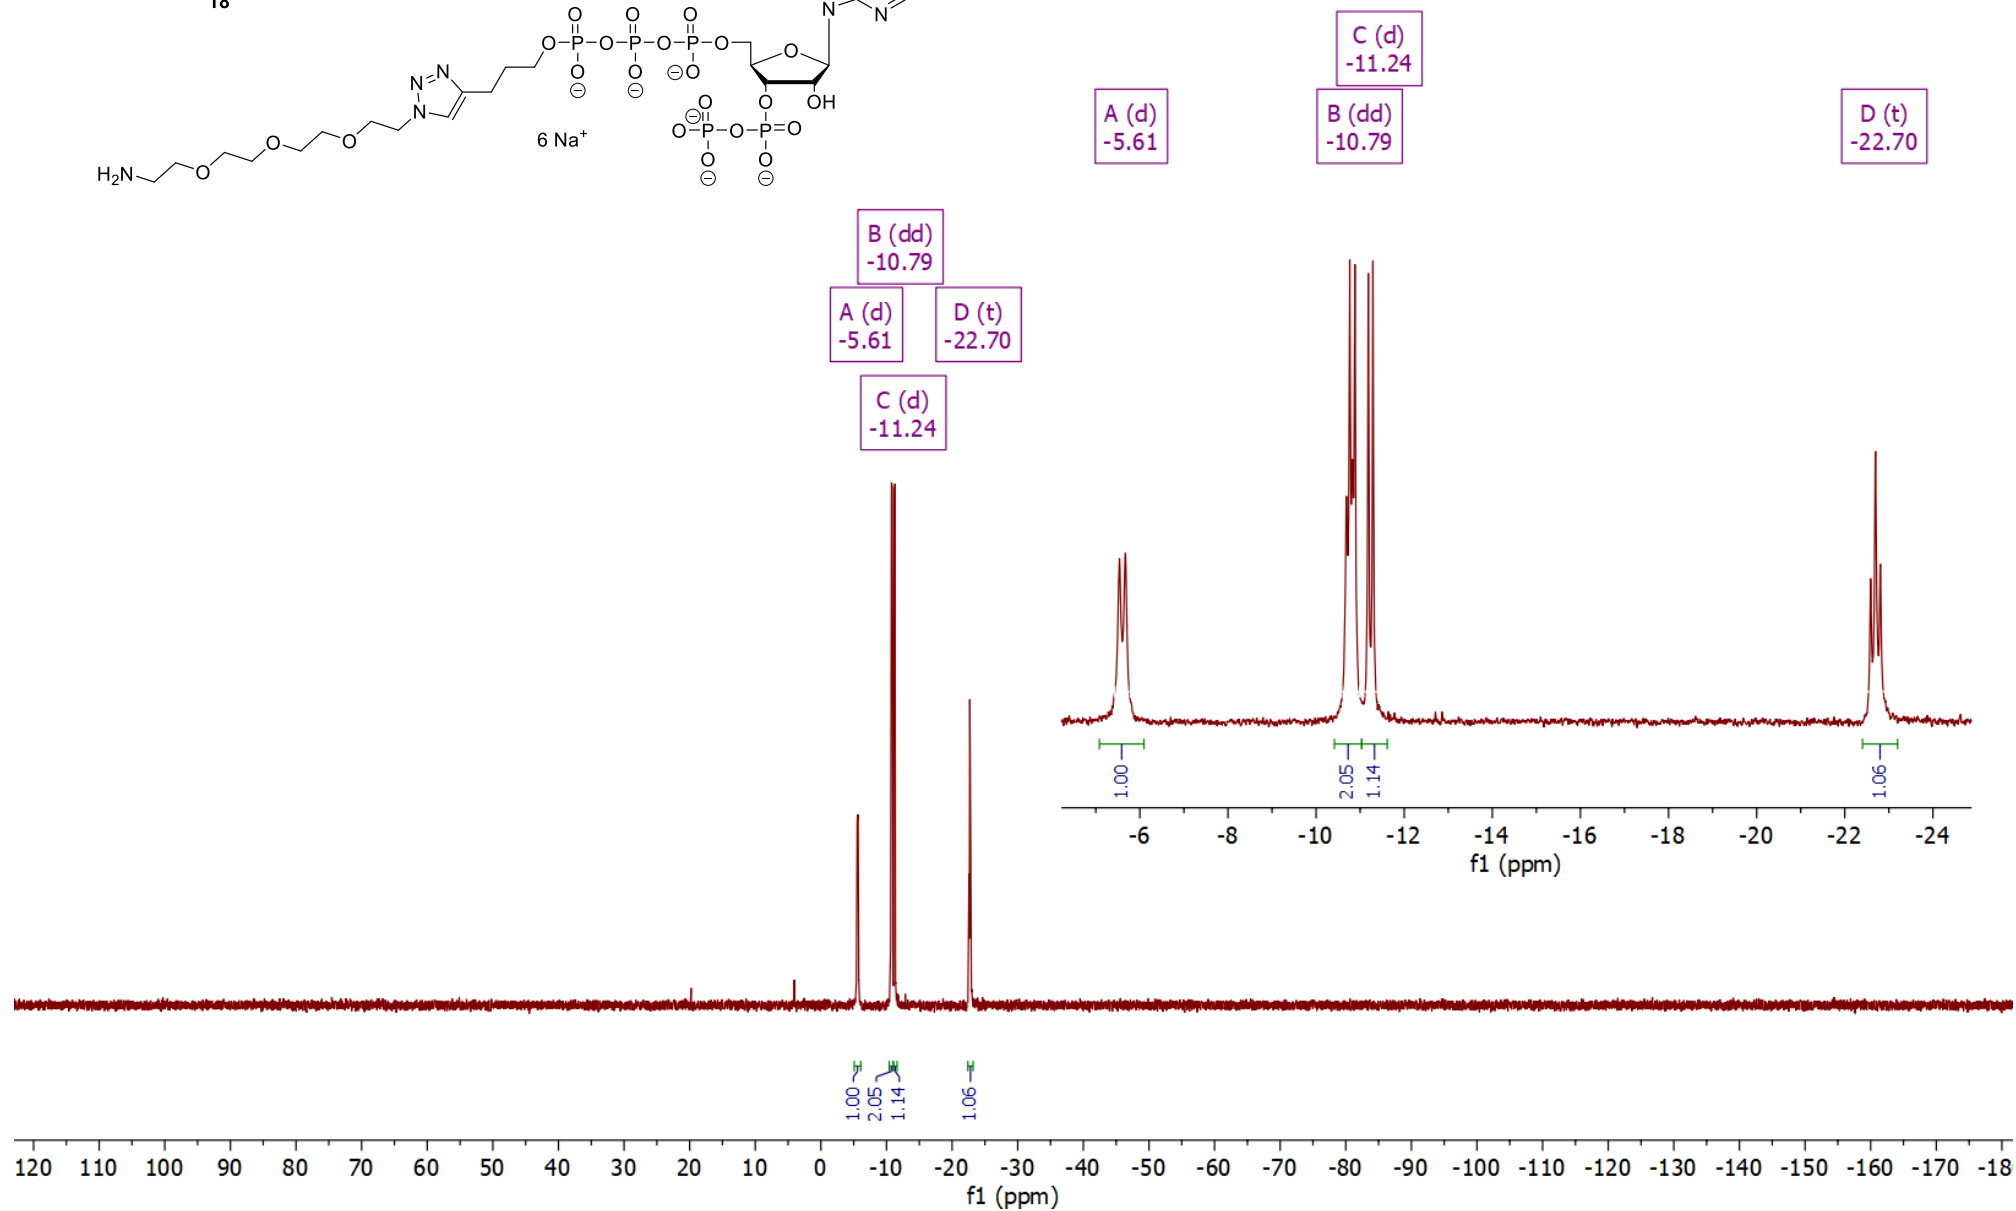

Compound **18** (amino-pppApp),  $^{13}\text{C}$ [ $^1\text{H}$ ]-NMR ( $\text{D}_2\text{O}$ , 101 MHz)

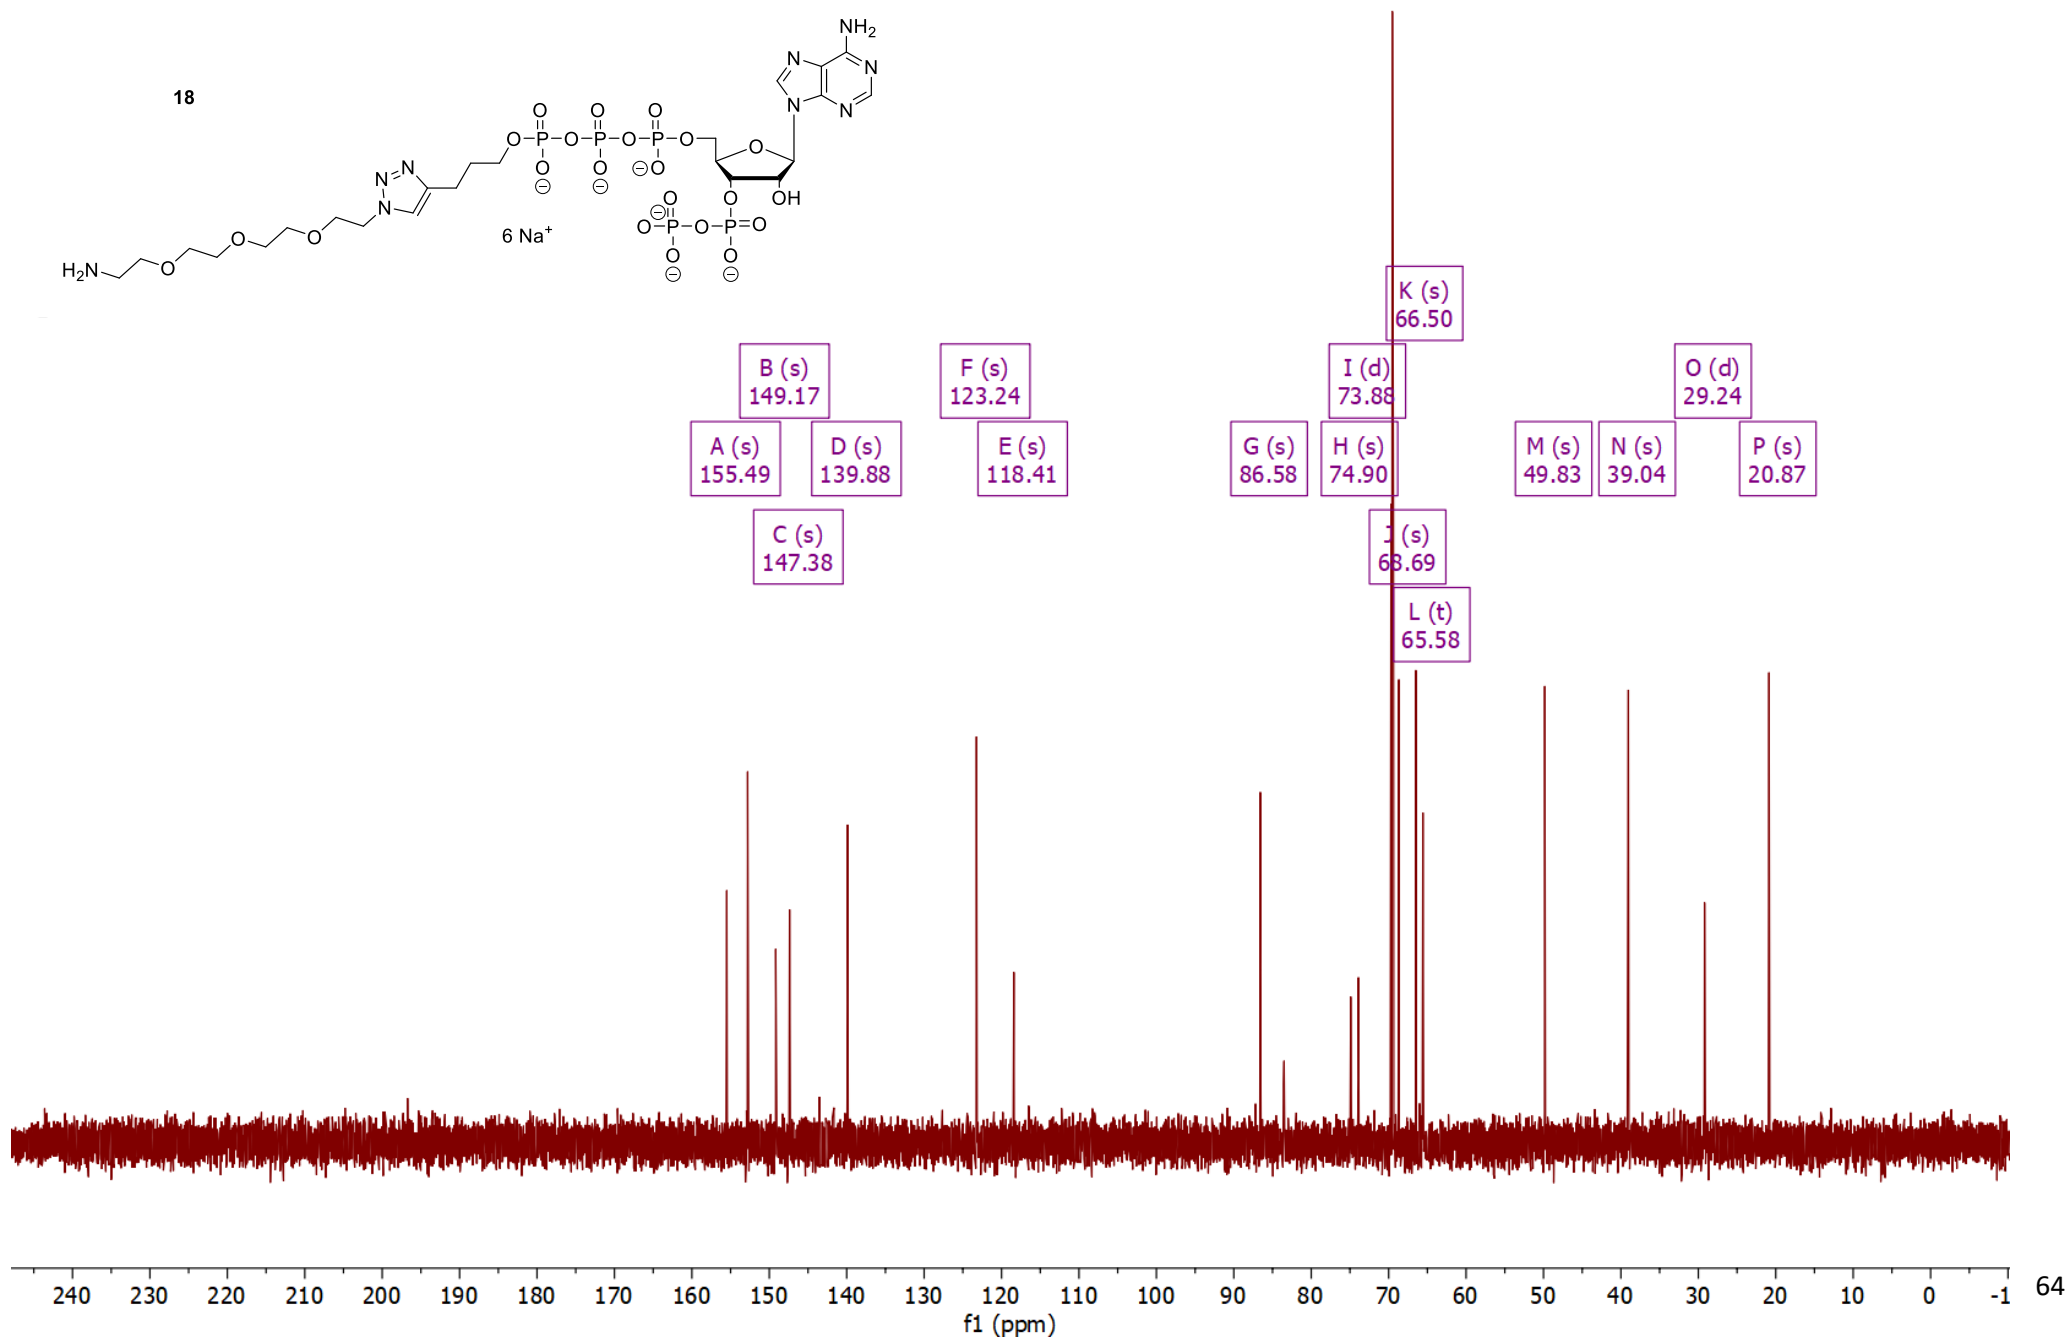

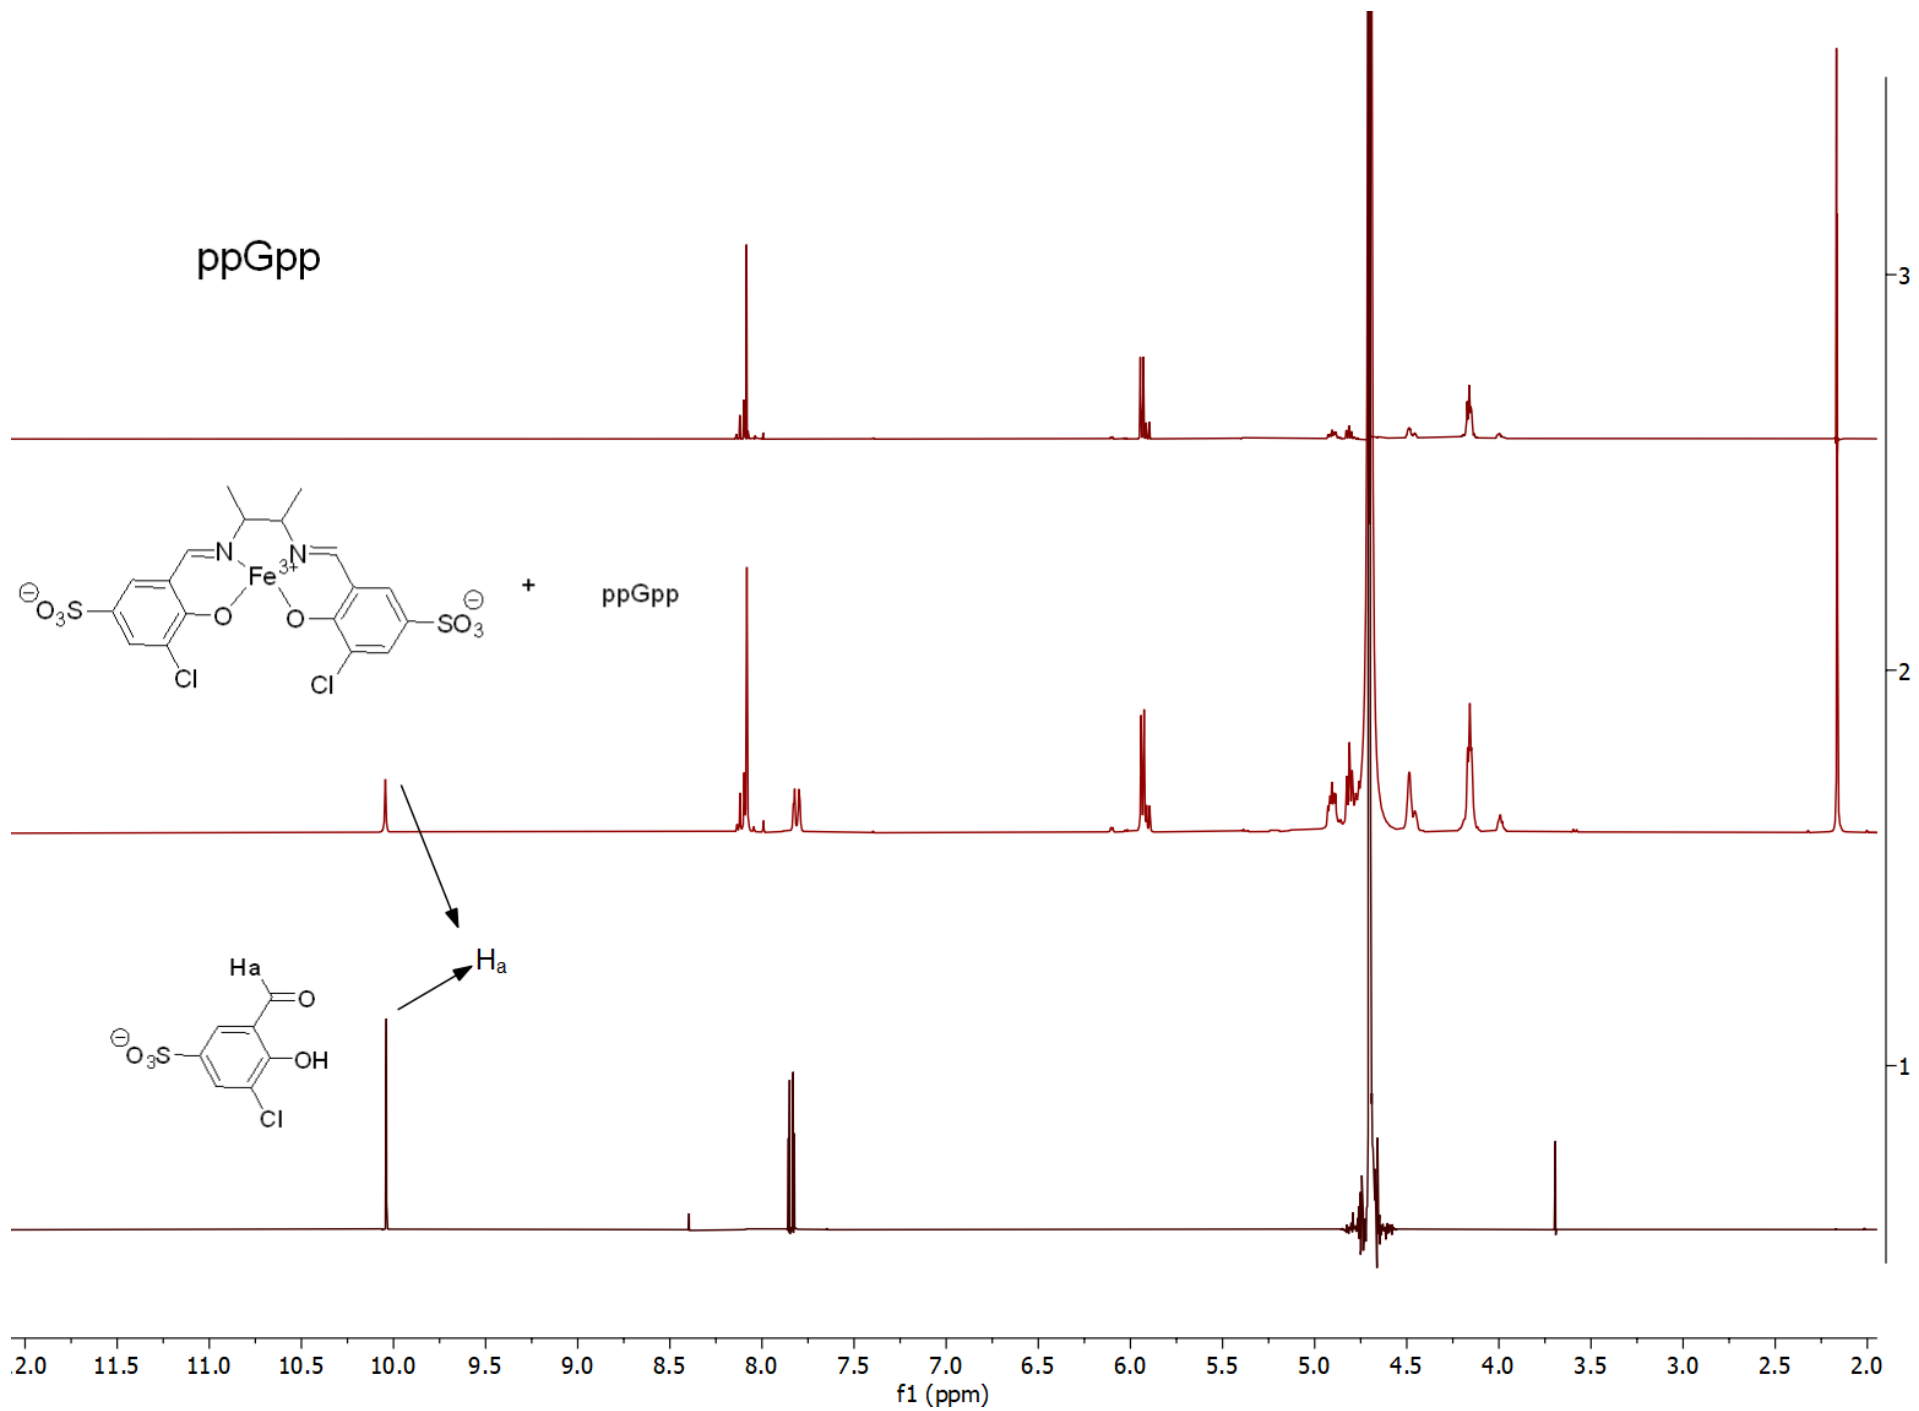

## 7. HRMS analysis

### HRMS (ESI) Analysis of compound 16: PpppAp

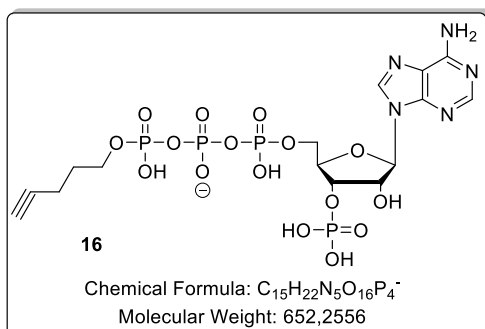

#### - Scan (rt: 0.823-1.083 min) Sub

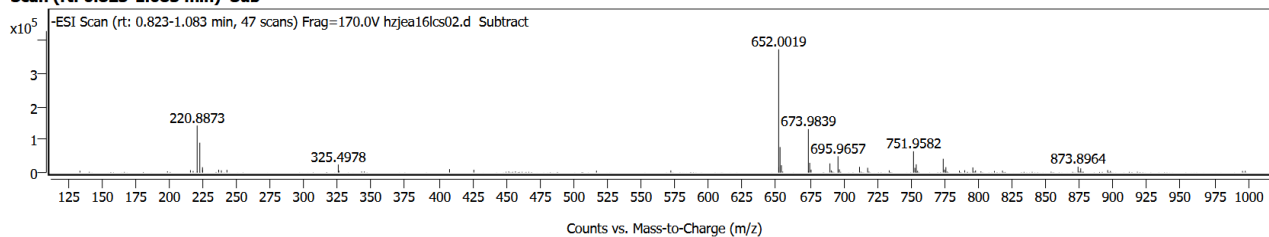

### HRMS (ESI) Analysis of compound 17: PpppApp

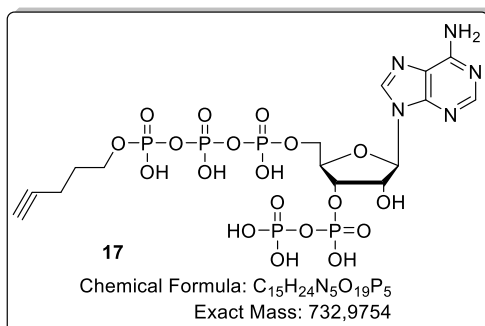

#### - Scan (rt: -0.012-0.022 min) Sub

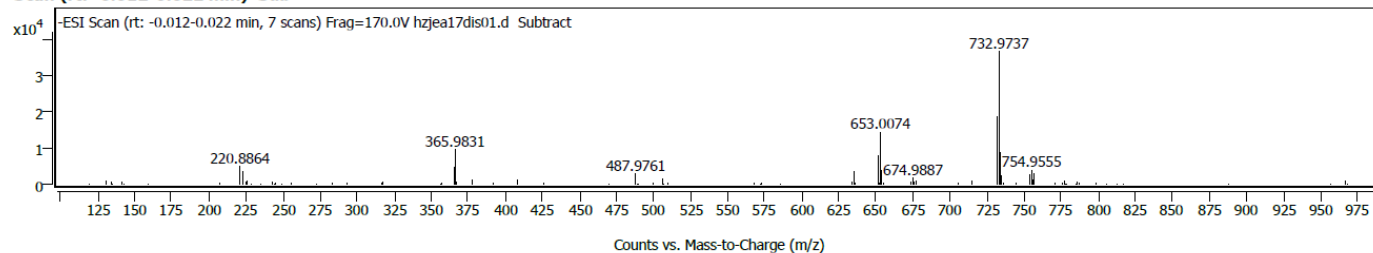

## HRMS (ESI) Analysis of compound 18: ApppApp

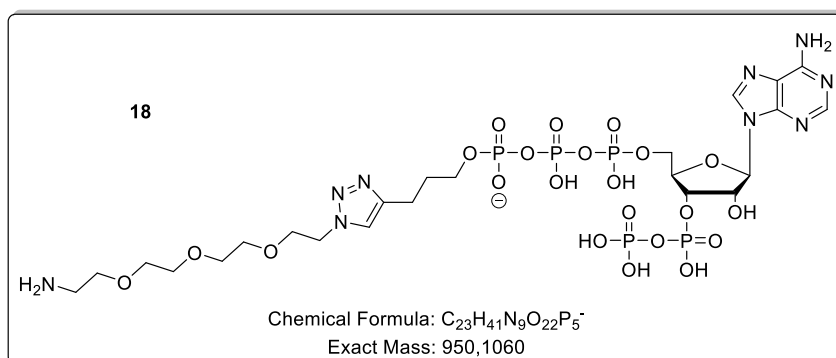

### - Scan (rt: -0.001-0.032 min) Sub

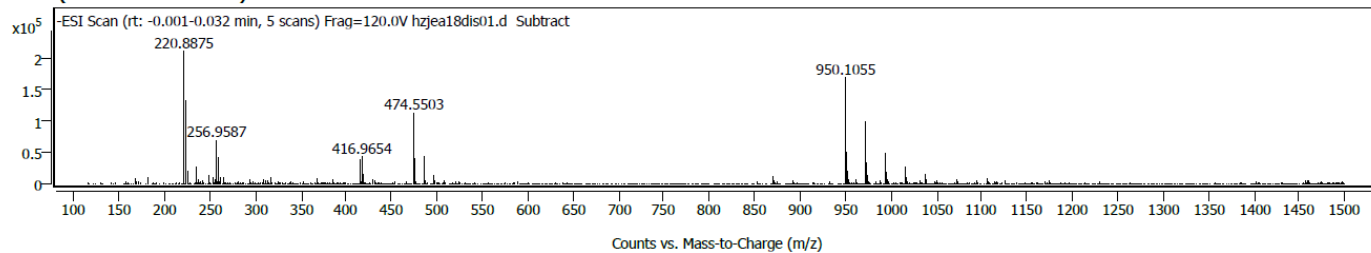

## HRMS (ESI) Analysis of compound 8: ppAp

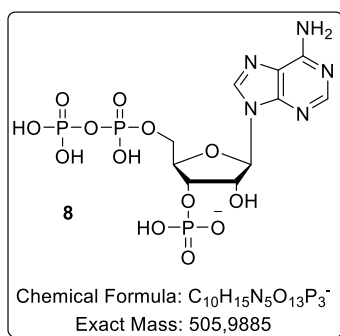

mjea38shr1 #1 RT: 0.02 AV: 1 NL: 4.09E8  
T: FTMS - p ESI Full lock ms [100.00-1100.00]

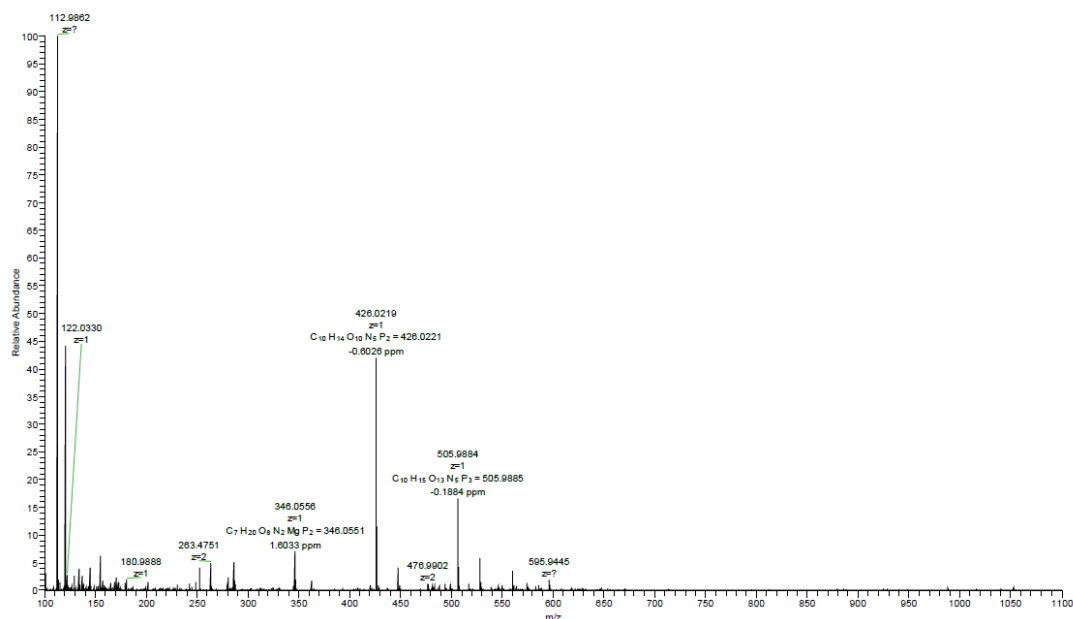

## HRMS (ESI) Analysis of compound 11: ppGp

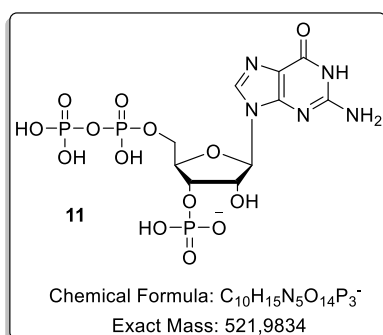

### - Scan (rt: 0.899-1.110 min) Sub

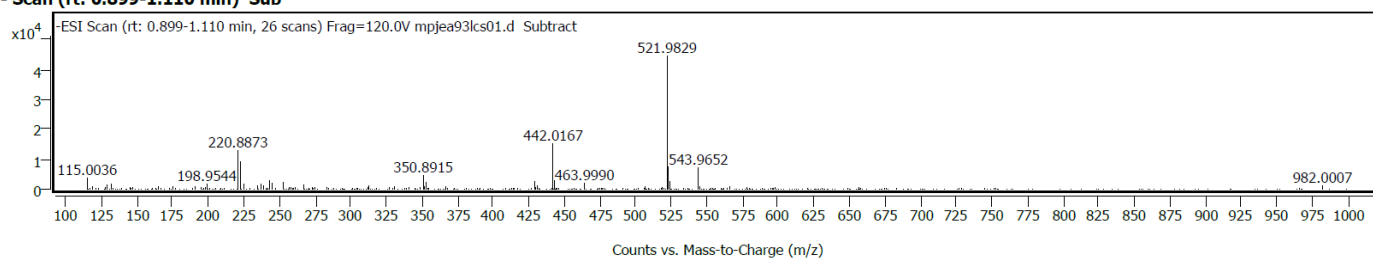

## HRMS (ESI) Analysis of compound 13: pppApp

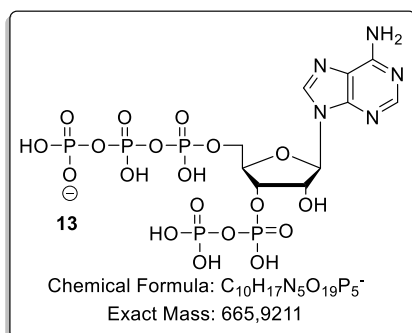

### - Scan (rt: 0.398 min) Sub (3)

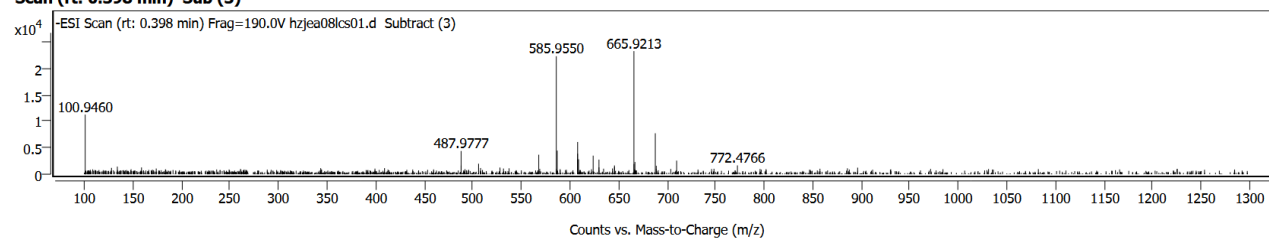

## HRMS (ESI) Analysis of compound 12: pppGpp

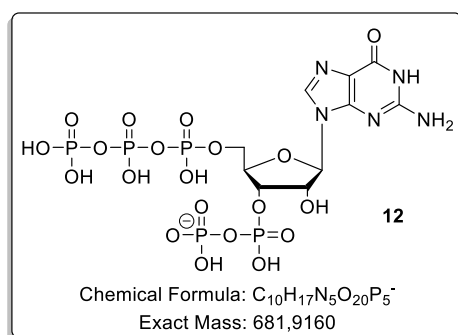

### - Scan (rt: 0.200 min) Sub

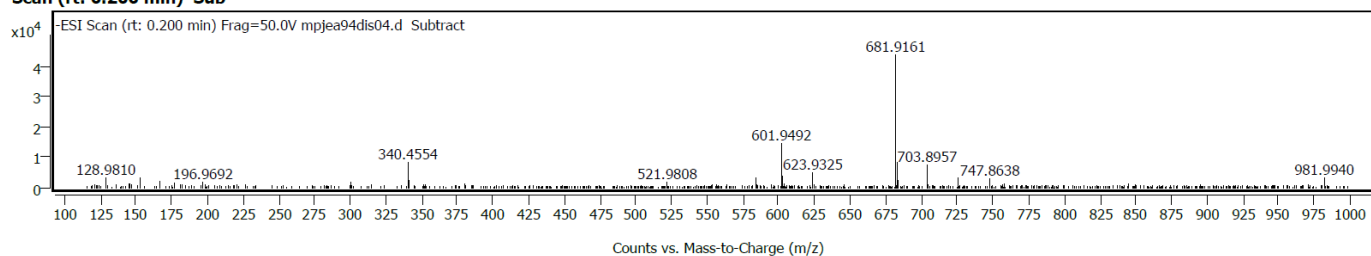

## References

- 1 L. Bialy and H. Waldmann, *Angew. Chem. Int. Ed.*, 2002, **41**, 1748.
- 2 A. Hofer, G. S. Cremonik, A. C. Müller, R. Giambruno, C. Trefzer, G. Superti-Furga, K. L. Bennett and H. J. Jessen, *Chemistry (Weinheim an der Bergstrasse, Germany)*, 2015, **21**, 10116.
- 3 T. M. Haas, P. Ebensperger, V. B. Eisenbeis, C. Nopper, T. Dürr, N. Jork, N. Steck, C. Jessen-Trefzer and H. J. Jessen, *Chemical communications (Cambridge, England)*, 2019, **55**, 5339.
- 4 J. Singh, A. Ripp, T. M. Haas, D. Qiu, M. Keller, P. A. Wender, J. S. Siegel, K. K. Baldrige and H. J. Jessen, *Journal of the American Chemical Society*, 2019, **141**, 15013.
- 5 P. J. L. M. Quaedflieg, A. P. van der Heiden, L. H. Koole, A. J. J. M. Coenen, S. van der Wal and E. M. Meijer, *J. Org. Chem.*, 1991, **56**, 5846.
- 6 A. Ripp, M. Krämer, V. Barth, P. Moser, T. M. Haas, J. Singh, T. Huck, L. Gleue, K. Friedland, M. Helm and H. J. Jessen, *Angew. Chem. Int. Ed.*, 2025, **64**, e202414537.
- 7 N. Kumari, H. Huang, H. Chao, G. Gasser and F. Zelder, *Chembiochem : a European journal of chemical biology*, 2016, **17**, 1211.
- 8 M. J. Frisch, G. W. Trucks and D. J. Fox, Gaussian 16 (Revision C.01), Gaussian, Inc., Wallingford, CT, 2019.
- 9 A. D. Becke, *The Journal of Chemical Physics*, 1993, **98**, 5648.
- 10 F. Weigend and R. Ahlrichs, *Physical chemistry chemical physics : PCCP*, 2005, **7**, 3297.
- 11 M. Dolg, U. Wedig, H. Stoll and H. Preuss, *The Journal of Chemical Physics*, 1987, **86**, 866.
- 12 J. Tomasi, B. Mennucci and R. Cammi, *Chemical reviews*, 2005, **105**, 2999.
- 13 S. Grimme, S. Ehrlich and L. Goerigk, *Journal of computational chemistry*, 2011, **32**, 1456.
